# Supplementary material for: Examining the psychological and financial impact of travel restrictions on citizens and permanent residents stranded abroad during the COVID-19 pandemic: international cross-sectional study
Source: PubMed Central journal article supplement — BMJ Open. 2022 May 19;12(5):e059922. doi: 10.1136/bmjopen-2021-059922 (PMC9121108; doi:10.1136/bmjopen-2021-059922), 2022-05-19
Supplement: bmjopen-2021-059922.draft_revisions.pdf [file bmjopen-2021-059922.draft_revisions.pdf]

# BMJ Open

BMJ Open is committed to open peer review. As part of this commitment we make the peer review history of every article we publish publicly available.

When an article is published we post the peer reviewers' comments and the authors' responses online. We also post the versions of the paper that were used during peer review. These are the versions that the peer review comments apply to.

The versions of the paper that follow are the versions that were submitted during the peer review process. They are not the versions of record or the final published versions. They should not be cited or distributed as the published version of this manuscript.

BMJ Open is an open access journal and the full, final, typeset and author-corrected version of record of the manuscript is available on our site with no access controls, subscription charges or pay-per-view fees (<http://bmjopen.bmj.com>).

If you have any questions on BMJ Open's open peer review process please email [info.bmjopen@bmj.com](mailto:info.bmjopen@bmj.com)

# BMJ Open

## Stranded abroad during the COVID-19 pandemic: examining the psychological and financial impact of border restrictions

|                               |                                                                                                                                                                                                                                                                                                                                                                                                                                                          |
|-------------------------------|----------------------------------------------------------------------------------------------------------------------------------------------------------------------------------------------------------------------------------------------------------------------------------------------------------------------------------------------------------------------------------------------------------------------------------------------------------|
| Journal:                      | <i>BMJ Open</i>                                                                                                                                                                                                                                                                                                                                                                                                                                          |
| Manuscript ID                 | bmjopen-2021-059922                                                                                                                                                                                                                                                                                                                                                                                                                                      |
| Article Type:                 | Original research                                                                                                                                                                                                                                                                                                                                                                                                                                        |
| Date Submitted by the Author: | 13-Dec-2021                                                                                                                                                                                                                                                                                                                                                                                                                                              |
| Complete List of Authors:     | McDermid, Pippa; University of New South Wales, School of Population Health<br>Craig, Adam; University of New South Wales, School of Population Health<br>Sheel, Meru; Australian National University, National Centre for Epidemiology and Population Health<br>Blazek, Katrina; University of New South Wales, School of Population Health<br>Talty, Siobhan; The Me AL/TA<br>Seale, Holly; University of New South Wales, School of Population Health |
| Keywords:                     | COVID-19, Public health < INFECTIOUS DISEASES, MENTAL HEALTH                                                                                                                                                                                                                                                                                                                                                                                             |
|                               |                                                                                                                                                                                                                                                                                                                                                                                                                                                          |

SCHOLARONE™  
Manuscripts

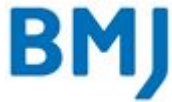

I, the Submitting Author has the right to grant and does grant on behalf of all authors of the Work (as defined in the below author licence), an exclusive licence and/or a non-exclusive licence for contributions from authors who are: i) UK Crown employees; ii) where BMJ has agreed a CC-BY licence shall apply, and/or iii) in accordance with the terms applicable for US Federal Government officers or employees acting as part of their official duties; on a worldwide, perpetual, irrevocable, royalty-free basis to BMJ Publishing Group Ltd ("BMJ") its licensees and where the relevant Journal is co-owned by BMJ to the co-owners of the Journal, to publish the Work in this journal and any other BMJ products and to exploit all rights, as set out in our [licence](#).

The Submitting Author accepts and understands that any supply made under these terms is made by BMJ to the Submitting Author unless you are acting as an employee on behalf of your employer or a postgraduate student of an affiliated institution which is paying any applicable article publishing charge ("APC") for Open Access articles. Where the Submitting Author wishes to make the Work available on an Open Access basis (and intends to pay the relevant APC), the terms of reuse of such Open Access shall be governed by a Creative Commons licence – details of these licences and which [Creative Commons](#) licence will apply to this Work are set out in our licence referred to above.

Other than as permitted in any relevant BMJ Author's Self Archiving Policies, I confirm this Work has not been accepted for publication elsewhere, is not being considered for publication elsewhere and does not duplicate material already published. I confirm all authors consent to publication of this Work and authorise the granting of this licence.

1  
2  
3 **Stranded abroad during the COVID-19 pandemic: examining the psychological and**  
4 **financial impact of border restrictions**  
5  
6  
7

8 **Authors: Pippa McDermid<sup>1</sup>, Adam Craig<sup>1</sup>, Meru Sheel<sup>2</sup>, Katrina Blazek<sup>1</sup>, Siobhan**  
9 **Talty<sup>3</sup>, and Holly Seale<sup>1</sup>**  
10  
11  
12

13 **Authors Affiliations**  
14

- 15 1. School of Population Health, University of New South Wales, Sydney, NSW, Australia.  
16  
17 2. National Centre for Epidemiology and Population Health, Research School of Population  
18 Health, ANU College of Health and Medicine, The Australian National University, Acton,  
19 ACT, Australia  
20  
21  
22 3. Freelance Monitoring, Evaluation, Accountability and Learning Technical Advisor,  
23 ME(AL). TA  
24  
25  
26

27 Correspondence  
28

29 Associate Professor. Holly Seale  
30 School of Population Health  
31 Level 2, Samuels Building  
32 Faculty of Medicine, UNSW Australia  
33 Sydney 2052, Australia  
34 Telephone: +61 (2) 9385 3129  
35 Email: [h.seale@unsw.edu.au](mailto:h.seale@unsw.edu.au)  
36  
37  
38  
39  
40  
41  
42

43 Word count: 3664

44 Abstract: 310; Main body: 3354

45  
46 Keywords: COVID-19; Pandemic; Public Health; Travel; Depression; Anxiety; Stress  
47  
48  
49  
50  
51  
52  
53  
54  
55  
56  
57  
58  
59  
60

## ABSTRACT

**Objective:** With the easing of COVID-19-related international travel restrictions in late 2021 it is time to consider the direct and indirect social, emotional, and financial impacts that these border closures have had. The study aims to evaluate the psychological and financial distress reported by people stranded abroad due to international travel restrictions introduced in response to the COVID-19 pandemic.

**Methods:** Between July and September 2021, we implemented a cross-sectional online survey targeting individuals stranded abroad due to international travel restrictions. The survey collected data about COVID-19 travel restriction-related travel impacts; personal stress, anxiety, and depression (using the validated DASS-21 tool); as well as impacts on housing and financial security; and demographic data.

**Findings:** We had 1054 participants complete the survey; most were trying to return to the Oceania region (75.4%), with 45% stranded in Europe. Overall, 64.2% reported financial distress while stranded abroad. 64.4% ( $\bar{x}$ =9.43, SD=5.81) reported either a moderate or severe (based on the DASS-21 classification) level of depression, 41.7% for anxiety ( $\bar{x}$ =5.46, SD=4.74), and 58.1% for stress ( $\bar{x}$ =10.64, SD=5.26). Statistically significant factors associated with moderate to extremely severe depression, anxiety, and stress were financial stress, an employment change, being <30yrs, having a high perceived risk of contracting COVID-19 abroad and being stranded for >2 months.

**Conclusion:** The study is among the first to explore the psychological and financial distress-related impacts associated with being stranded abroad due to COVID-19 travel restrictions. It highlights a range of unintended consequences that arise from pandemic-related travel restriction, identifies the health and social needs for a particularly vulnerable population, and provides clues as to the types of support that may be adopted to best support them. This research will assist policymakers in identifying support packages for people stranded abroad due to global disaster.

## STRENGTHS AND LIMITATIONS OF THIS STUDY

- One of the first to explore the psychological and financial distress-related impacts associated with being stranded abroad due to COVID-19 travel restrictions
- Analysing responses from respondents globally identified that 64% had moderate to extreme depression
- Respondents experienced homelessness, significant financial distress, and reported little to no support from their national governments.
- While all attempts were made to recruit participants from around the world, the study relied on convenience sampling approaches and so we may not have captured all relevant countries.

## BACKGROUND

In response to the COVID-19 pandemic, most countries around the world have implemented some level of international travel restriction or complete border closures (1-3). As of February 2020, many countries had commenced repatriation of their citizens stranded abroad. By the end of 2020, some countries like Japan and Spain claimed to have completely repatriated every citizen that wanted to return. However, reports continue to suggest stranded travellers are still trying to get to their country of residence (referred to as 'home') 20 months into the COVID-19 pandemic despite many countries reopening borders (4, 5).

Factors impacting on people's ability to return to their home have included countries placing limits on the number of passengers that can enter the country, caps on the hotel quarantine capacities, the cost of travel and hotel quarantine, and in some cases having restrictions on flights from certain high-risk countries. Our previous study (pre-print available) suggested that the support available to those who were stranded abroad was limited, and in some cases difficult to access and comprehend (6). Support provided by countries has varied from repatriation flights, emergency accommodation, mental health and medical assistance, emergency call lines and financial assistance. However, of the countries that were reviewed, we were unable to identify any one country providing all the different support types listed. Public commentary through news and social media has hinted at the level of psychosocial impact on citizens stranded abroad. These articles suggest that many of these travellers felt abandoned by their governments, had little financial support, and for some, experienced depression and homelessness (7-9). While the findings from many COVID-19 studies have reported high levels of psychological distress in nearly all populations, the focus of these studies has been on domestic populations, like healthcare and frontline workers, students and those in lockdown and quarantine (9-18). One study, with similar aims to the present study, found 63% of Saudi citizens living abroad as students during COVID-19 experienced 'psychiatric' distress symptoms (19).

There is currently limited understanding of the level of psychological distress that has been experienced by those stranded abroad wanting to return. This study examined the impacts of travel restrictions on people stranded abroad, who were unable to return to their country of citizenship/residence during the COVID-19 pandemic. We aimed to 1) measure the prevalence of psychological impact associated with being stranded overseas due to covid-related travel restrictions and 2) identify demographic and circumstantial factors associated with severe psychological impact.

## METHODS

### Population and procedures

An online survey was created and administered anonymously using the *Qualtrics* (20) survey platform, with respondents recruited through a variety of social media channels. Respondents were those people who were either still stranded away from their country of residence/home or had been stranded at some point since the commencement of the COVID-19 pandemic. There were no limitations placed on the country of residence, nor the length of time the person had been stranded for. To meet the inclusion criteria, respondents had to self-identify as having attempted to return to their country of residence but have had their travel plans changed. The survey was open between 20 July 2021 and 24 September 2021. Participants unique IP addresses prevented duplicate entries. Ethical approval for this study was granted by the UNSW Human Research Ethics Committee (#210418). All participants indicated their consent to participate.

### Patient and Public Involvement

No patient involved

### Survey instruments and measures

Demographics: included gender, age, level of education, ethnicity, employment status, history of chronic illness, and living status. Ethnicity was classified based on the nine broad groups according to the Australian Standard Classification of Cultural and Ethnic Groups (21).

Travel experiences: Respondents were asked where they were stranded abroad and where they intended to return to, and this data was recoded into geographic groups based on the World Health Organisation regions (22). Questions focused on their current situation (whether they had returned, were still stranded abroad awaiting return or still abroad but had decided to stay), flight cancellations/delays, length of time waiting to return and their experiences with travel.

Mental wellbeing: The depression, anxiety, and stress scale (DASS-21) was used in this study (23). The DASS-21 is a validated self-report tool, previously used in COVID-19 research studies (13, 24), containing 21 items assessing scores of depression, anxiety, and stress symptoms (7 items each). Respondents were asked to reflect on when they were stranded abroad (for participants who had already returned) or reflecting on the last two weeks and rate each statement on a 5-point Likert scale from 0 (unsure/do not recall; did not apply to me at all) to 3 (applied to me very much, or most of the time). Scores in each sub section are then multiplied by 2 to give a final score categorising the depression, anxiety, and stress into



1  
2  
3 normal, mild, moderate, severe, or extremely severe. Higher scores reflect increased  
4 emotional and psychological distress.

5  
6 As we suspected some potential participants having returned home already and could be  
7 potentially reflecting further than 2 weeks, we included an additional option of “unsure/do  
8 not recall” to allow for removal of recall bias during the analyses phase. Participants were  
9 asked whether they had access to crisis support or mental health services while abroad and if  
10 ‘yes’, whether they had used this service or support. Finally, respondents reported their  
11 perceived risk of contracting COVID-19 both in the country where they are/were stranded  
12 and the country where they had or were waiting to return to (Scale of 1-10; 1 being no risk  
13 and 10 being high risk).  
14

15 Financial wellbeing: Respondents were initially asked whether they felt financial stress while  
16 stranded abroad (yes/no), then if ‘yes’ were asked how they addressed the financial stress  
17 (receiving financial support from family, government loans, bank credit, or social services).  
18 Questions on employment situation and changes while abroad were asked along with a  
19 question on whether the participant experienced homelessness while abroad. Homelessness  
20 was defined as a period where participants did not have somewhere to stay/live.  
21

### 22 **Statistical analyses**

23 We aimed to collect responses from a minimum of 1,200 people to allow analysis with a  
24 margin of error of approximately 3.2%. Descriptive analysis involved the calculation of  
25 means, standard deviation, confidence interval and standard errors. Chi-square test of  
26 independence were first used to compare categorical variables. Independent variables that  
27 showed a significant association with DASS severity scores at a  $p < .2$  level was included in  
28 the model as predictor variables. The DASS scores were dichotomised to reflect either  
29 no/mild symptom severity or moderate to extremely severe. Multivariable logistic regression  
30 was then performed to analyse the effect of age, perceived risk of contracting COVID-19  
31 while stranded, financial stress, time stranded, employment change and homelessness on  
32 predicting moderate to extremely DASS. No multicollinearity amongst variables was  
33 identified. P values of  $< .05$  was considered statistically significant. All data analyses were  
34 conducted using SPSS (25).  
35  
36  
37  
38  
39  
40  
41  
42  
43  
44  
45  
46  
47  
48  
49  
50  
51  
52  
53  
54  
55  
56  
57  
58  
59  
60

## RESULTS

### Participant characteristics

A total of 1054 participants completed the full survey, while a further 296 respondents completed over 75% of the questions and were included. Demographic information is provided in Table 1. The mean age was  $41.09 \pm 13.08$ , with 69.5% being female, 43.8% of north-west European ethnicity, while most had a tertiary education (90.7%) and were stranded in the European Region (EUR) and were trying to return to the Western Pacific Region (WPR).

Almost one in four participants ( $n = 303/1214$ ) reported a historical or current COVID-19 infection, and of those the majority rated a 'mild' symptom severity (85.1%). Participants' overall level of perceived risk of contracting COVID-19 while abroad was moderate to high ( $n = 806$ ,  $M = 6.64$ ,  $SD = 2.85$ , range 1-10, where 1 = no risk, and 10 = high risk), with 25.4% rating the perceived risk while abroad at high risk (10). Comparatively, the overall level of perceived risk of contracting COVID-19 in the country where participants had returned to was low to moderate ( $n = 605$ ,  $M = 5.10$ ,  $SD = 2.72$ , range 1-10, where 1 = no risk, and 10 = high risk), with 21.4% rating the perceived risk at 'home' as low risk.

### Travel experiences

Initially 44% of respondents had left their country of residence to take up long-term employment, with over 60% stranded abroad for more than 5 months (63.6%), and just over a quarter either having had booked a flight or awaiting flight availability (26.6%). Refer to table 2 for a full breakdown of participants experiences and current situation while stranded abroad.

### Mental wellbeing

Figure 1 presents the respondents ( $n = 1133$ ) self-reported depression, anxiety, stress symptom severity scores based on the DASS-21 tool. Of the respondents, 64.4% scored moderate to extremely severe depression symptoms ( $\bar{x} = 9.43$ ,  $SD = 5.81$ ), 41.7% scoring moderate to extremely severe anxiety symptoms ( $\bar{x} = 5.46$ ,  $SD = 4.74$ ), and 58.1% scoring between moderate to extremely severe stress symptoms ( $\bar{x} = 10.64$ ,  $SD = 5.26$ ).

Many reported no access to crisis support or mental health services while abroad (63.5%) ( $n = 719/1133$ ), and of those that did have access, only 37.9% ( $n = 272/719$ ) utilised the services. A total of 12% ( $n = 133/1112$ ) experienced a period of homelessness while stranded abroad. Of those that were willing to share their experiences ( $n = 94$ ), commonly noted situations included living in temporary accommodation (32%), sleeping on the couch or in a spare bedroom at a friend/family members place (32%), and staying in emergency

1  
2  
3 accommodation (including homeless shelters) (17%). Less common experiences were those  
4 that lived on the street, trains, at the airport, in cars, in tents (<20%). Two respondents  
5 disclosed having experienced a sexual assault while homeless shelter.  
6  
7

### 8 **Financial wellbeing**

9  
10 Financial distress was reported in 64.2% (n=723/1127), and 45% (n=433/1127) reported a  
11 change in employment. A breakdown of ways in which participants sought to address  
12 financial distress along with employment changes and current employment situation are  
13 reported in Table 3.  
14  
15

### 16 **Factors associated with and predictors of depression, anxiety, and stress**

17  
18 Chi square analyses revealed significant associations between participants DASS categories  
19 and their age, time stranded abroad, financial stress, homelessness, employment change, and  
20 their perceived risk of contracting COVID-19. No associations were found between DASS  
21 severity categories and having access to crisis support or mental health services (see  
22 Supplementary file 1). For depression, logistic regression identified financial stress,  
23 employment change, and a high perceived risk of contracting COVID-19 as predictors of  
24 moderate to extremely severe depression. Overall, the model correctly discriminated 67.7%  
25 of cases and Nagelkerke R<sup>2</sup> indicated a 14% variation of depression explained by the model.  
26 For anxiety, logistic regression identified financial stress, employment change, and a high  
27 perceived risk of contracting COVID-19, as predictors of moderate to extremely severe  
28 anxiety. Overall, the model correctly discriminated 64.5% of cases and Nagelkerke R<sup>2</sup>  
29 indicated a 13% variation of anxiety explained by the model. Finally for stress, logistic  
30 regression identified financial stress, employment change, and a high perceived risk of  
31 contracting COVID-19, as predictors of moderate to extremely severe stress. Overall, the  
32 model showed goodness of fit to the data ( $\chi^2(14) = 95.772, p < .001$ ), correctly discriminated  
33 63.6% of cases and Nagelkerke R<sup>2</sup> indicated a 13% variation of stress explained by the  
34 model. Table 4 presents results of the multivariable logistic regression. Being 30 years or  
35 older and stranded for 2 months or less was associated with decreased odds of moderate to  
36 extremely severe depression, anxiety, and stress.  
37  
38  
39  
40  
41  
42  
43  
44  
45  
46  
47  
48  
49  
50  
51  
52  
53  
54  
55  
56  
57  
58  
59  
60

## DISCUSSION

This study evaluated the psychological and financial distress of individuals stranded abroad during the COVID-19 pandemic and highlights the importance of providing additional support to this vulnerable group in future public health events. Amongst our respondents we found that over half had been stranded for longer than five months, with the majority having more than one flight cancellation or change. Our results confirm sentiments shared on social media by people stranded abroad, that reflect experiences of having no financial support, depression, homelessness and a general feeling of abandonment by their governments (7-9). Given the continued flight changes and delays (incurring additional costs) in the population of individuals stranded abroad, along with changes to employment, it is perhaps not surprising that we documented a high level of financial distress (64.2%), employment changes (45%), and experiences of homelessness (12%). Our findings align with results from non-travel related COVID studies which have indicated an increase in financial distress (16), increases in experiences of homelessness (26) and growing employment changes (27) during the pandemic. Comparatively, we reported much higher findings compared to a survey of the general population conducted within the first 6 months of the pandemic, finding that 30% of Australians were financially stressed because of the pandemic (28). This difference could be explained by those stranded abroad having different elements of uncertainty (additional flight costs, additional rent, and expenses due to the length of time stranded, and uncertain employment) compared to the general population.

Based on our findings, we recommend policymakers prioritise increasing the availability of financial assistance in the form of government grants or loans for living and flight costs incurred due to being stranded abroad, or alternatively providing the option to access social support while abroad if an individual would have been eligible had they not been abroad. Furthermore, considering the proportion of people who reported experiencing homelessness, the cases of sexual assault within homeless shelters, and previous research indicating a lack of emergency accommodation options for citizens abroad during COVID-19 (6), it is recommended that policymakers provide a solution to this issue, whether it be through financial assistance or an emergency accommodation program similar to those that the French and Spanish governments introduced (6).

At this stage in the pandemic, it is almost indisputable that COVID-19 has had a psychological impact on populations around the world, whether it be healthcare workers, people in lockdown or quarantine, or specific countries or communities, the stressors were all encompassing (10-13, 29, 30). Our findings reflect much higher incidence of moderate to

1  
2  
3 extremely severe depression (64.4%), anxiety (41.7%), and stress (58.1%), compared to  
4 domestic populations around the world (24). Previous research show lower DAS severity  
5 scores (24), especially when comparing our results to studies exploring psychological  
6 impacts of COVID-19 on healthcare workers (31, 32) and domestic students (33, 34). One  
7 study observing the psychological correlates of COVID-19 on the general population in  
8 Austria, reported drastically lower scores of depression (21.6%), anxiety (28.6%) and stress  
9 (28%), and found that 'frequent contact with family or friends' was shown to be a protective  
10 factor (24).

11  
12 However, research on international students during COVID-19, have reflected high DASS  
13 severity, similar to our study findings (19, 35). Possible reasons for these differences could be  
14 the parallels between international student experiences and those stranded, both living abroad  
15 and arguably away from their immediate social support network (family). A range of factors  
16 contributed to the psychological wellbeing of individuals in this study. Having financial  
17 stress, any employment change, being aged <50yrs, having a high perceived risk of  
18 contracting COVID-19 and being stranded for >5months were all associated with predicting  
19 moderate to extremely severe depression, anxiety, and stress. These results are not surprising  
20 considering the literature shows that many stressors, like financial distress, fear of COVID-19  
21 infection, loneliness, inadequate information, and employment issues have all presented as  
22 predictors of poor mental health and in the case of financial distress, can go further than  
23 predicting depression to suicidal thoughts and behaviours (30, 36). Unique to this study,  
24 however, is the finding that the longer an individual is stranded abroad the more likely they  
25 are to present with moderate to severe DAS symptoms.

26  
27 Interestingly, of the age categories in this investigation, participants >69yrs had lower scores  
28 of depression, anxiety, and stress, inconsistent with research conducted in Spain and Canada  
29 suggesting increased DASS scores in elders (37, 38). This, as was noted by the authors of the  
30 Sightlines Project (39), may be due to older people being more financial secure than other  
31 age groups. It may also reflect that older people were less likely to have insecurity associated  
32 with employment or have younger dependent family members to provide direct care to. This  
33 may have provided more opportunity for flexibility in their travel plans.

34  
35 These results reflecting high severity of DASS in those stranded abroad, provides both  
36 current and future direction for policymakers. We recommend policymakers provide  
37 adequate mental health interventions be available to those stranded abroad, either online or  
38 face-to-face where possible through a local consulate.

1  
2  
3 It is hard to deny that people have been deprived of the ability to return to their country of  
4 citizenship or permanent residence, as shown by the 63.3% of our respondents being stranded  
5 abroad for longer than 5 months. Addressing public health threats from a health security  
6 perspective has already increased fears that it legitimises government actions, potentially  
7 undermining personal sovereignty, and impeding human rights (40). A commonly cited  
8 human rights treaty in response to imposed restrictions is Article 12 (41) of the International  
9 Covenant on Civil and Political Rights (ICCPR), a treaty with 74 signatories and 173 parties  
10 which states that “No one shall be arbitrarily deprived of the right to enter his own country”  
11 (41).  
12

13  
14 The most frequently mentioned human rights breach was the Australian government  
15 imposing not only a complete ban on incoming flights from India, but potential criminal  
16 penalties of up to five years imprisonment, and/or fines up to \$66000 (AUD) (42). Mostly in  
17 reference to breaching Article 12 (41) of the International Covenant on Civil and Political  
18 Rights (ICCPR), this ban, implemented under the *Biosecurity Act 2015*(43), between April  
19 and May 2021, has been labelled a ‘racist rights breach’ (44), with the Australian Human  
20 Rights Commission approaching the federal government directly with their concerns (42).  
21 Due to impacts of ongoing border closures and individuals struggling to return home, as  
22 further highlighted in this study, Australian citizens stranded abroad submitted a human  
23 rights complaint to the United Nations Human Rights Committee under the ICCPR, with the  
24 UN Human Rights Committee already successfully requesting to the Australian Government  
25 the prompt repatriation of two Australians in April 2021 (45).  
26

27  
28 Due to the results of our study alongside the probable human rights breaches, we recommend  
29 policymakers seriously reconsider current and future restriction of movement of citizens and  
30 permanent residents returning home who are at risk of financial distress and severe DASS the  
31 longer that they are stranded for. With international borders reopening around the world,  
32 some being restricted for nearly 20 months, it is critical to not only look at the impact of  
33 travel restrictions from the perspective of reducing infectious disease importations, but also  
34 from the perspective of those stranded abroad, who were arguably one of the most impacted  
35 by them. In doing so, policymakers can determine where further support is needed in future  
36 emergency situations resulting in people stranded abroad.  
37

### 38 **Limitations**

39  
40 This work is not without limitations. Firstly, like other cross sectional survey studies, it lacks  
41 a longitudinal follow up on participants. Secondly, the self-report questionnaire for  
42 psychological symptoms raises possible selection bias and subjectivity, however our sample  
43  
44  
45  
46  
47  
48  
49  
50  
51  
52  
53  
54  
55  
56  
57  
58  
59  
60

1  
2  
3 size being large, and the addition of an optional 'do not recall' response should mitigate  
4 certain bias. Thirdly, we were unable to capture the specific immigration status of those  
5 returning, i.e., whether they were citizens, permanent residents, or short-term visa holders.  
6  
7 Finally, we did not examine pre-existing mental health conditions which could prove to be a  
8  
9 confounding factor, and there was an over representation of women, those returning to the  
10  
11 western pacific region and participants with an academic background, possible due to  
12  
13 convenience sampling issues and survey distribution from Australia, which may not fully  
14  
15 represent the population of people who were stranded abroad. Notwithstanding the previously  
16  
17 mentioned limitations, findings from this study provide insights not previously reported into  
18  
19 the psychological and financial impacts and support needed for individuals stranded abroad  
20  
21 due to COVID-19 travel restrictions. These insights will be valuable for policy makers as  
22  
23 they design and deliver support programs in response and prepare for future events.

### 24 **Conclusion**

25 This research suggests that being stranded abroad during COVID-19 may lead to not only an  
26  
27 increase in financial stress, but quite severe depression, anxiety, and stress. Our findings  
28  
29 show that being young, stranded abroad for longer, having a high perception of infection risk,  
30  
31 experiencing employment changes and financial stress are all associated with increased  
32  
33 severity of depression, anxiety, and stress. Participants reported that lack of mental and social  
34  
35 health support while stranded. This indicates that there are gaps in services available for this  
36  
37 vulnerable population or lack of communication as to how to access them; both issues that  
38  
39 need to be resolved.  
40  
41  
42  
43  
44  
45  
46  
47  
48  
49  
50  
51  
52  
53  
54  
55  
56  
57  
58  
59  
60

## ABBREVIATIONS

**AFR:** African region

**AMR:** Region of the Americas

**COVID-19:** Novel coronavirus disease 2019

**DAS:** Depression, anxiety, and stress

**DASS-21:** The 21-item depression, anxiety, and stress scale

**EMR:** Eastern Mediterranean region

**EUR:** European region

**SEAR:** South-East Asian region

**WPR:** Western Pacific region



## REFERENCES

1. Chinazzi M, Davis JT, Ajelli M, Gioannini C, Litvinova M, Merler S, et al. The effect of travel restrictions on the spread of the 2019 novel coronavirus (COVID-19) outbreak. *Science*. 2020;368(6489):395-400.
2. Seyfi S, Hall CM, Shabani B. COVID-19 and international travel restrictions: the geopolitics of health and tourism. *Tourism Geographies*. 2020:1-17.
3. von Tigerstrom BJ, Halabi SF, Wilson KR. The International Health Regulations (2005) and the re-establishment of international travel amidst the COVID-19 pandemic. *Journal of Travel Medicine*. 2020;27(8).
4. Ministry of Foreign Affairs to complete repatriation of Spaniards on close to 50 flights: Ministerio de Asuntos Exteriores; 2020 [Available from: [http://www.exteriores.gob.es/Portal/en/SalaDePrensa/NotasdePrensa/Paginas/2020\\_NOTAS\\_P/20200430\\_NOTA065.aspx](http://www.exteriores.gob.es/Portal/en/SalaDePrensa/NotasdePrensa/Paginas/2020_NOTAS_P/20200430_NOTA065.aspx)].
5. Keynote Speech by Foreign Minister MOTEGI at the 2ND TOKYO GLOBAL DIALOGUE “Japan’s Foreign Policy towards the post-COVID-19 world”: Ministry of Foreign Affairs of Japan; 2021 [Available from: [https://www.mofa.go.jp/fp/pp/page3e\\_001109.html](https://www.mofa.go.jp/fp/pp/page3e_001109.html)].
6. McDermid P, Craig A, Sheel M, Seale H. How have governments supported citizens stranded abroad due to COVID-19 travel restrictions? A comparative analysis of the financial and health support in eleven countries. *Research Square*; 2021.
7. Devlin M. "It was the worst possible situation": Canadians stuck abroad months into pandemic. *DH News*. 2020.
8. Fuller K. Australians stranded overseas 'betrayed', says a man telling of months of injury, illness and homelessness. *ABC Illawarra*. 2020.
9. Capper S. Abandoned overseas: The mental health toll of Australia's closed borders on its citizens. *SBS News*. 2021.
10. Burke T, Berry A, Taylor LK, Stafford O, Murphy E, Shevlin M, et al. Increased Psychological Distress during COVID-19 and Quarantine in Ireland: A National Survey. *J Clin Med*. 2020;9(11):3481.
11. Dawel A, Shou Y, Smithson M, Cherbuin N, Banfield M, Calear AL, et al. The Effect of COVID-19 on Mental Health and Wellbeing in a Representative Sample of Australian Adults. *Frontiers in Psychiatry*. 2020;11(1026).
12. Kalok A, Sharip S, Abdul Hafizz AM, Zainuddin ZM, Shafiee MN. The Psychological Impact of Movement Restriction during the COVID-19 Outbreak on Clinical Undergraduates: A Cross-Sectional Study. *Int J Environ Res Public Health*. 2020;17(22).
13. Newby JM, O’Moore K, Tang S, Christensen H, Faasse K. Acute mental health responses during the COVID-19 pandemic in Australia. *PLOS ONE*. 2020;15(7):e0236562.
14. O’Sullivan D, Rahamathulla M, Pawar M. The Impact and Implications of COVID-19: An Australian Perspective. *The International Journal of Community and Social Development*. 2020;2(2):134-51.
15. Rajkumar RP. COVID-19 and mental health: A review of the existing literature. *Asian J Psychiatr*. 2020;52:102066-.
16. Robillard R, Saad M, Edwards J, Solomonova E, Pennestri M-H, Daros A, et al. Social, financial and psychological stress during an emerging pandemic: observations from a population survey in the acute phase of COVID-19. *BMJ Open*. 2020;10(12):e043805.
17. Sher L. The impact of the COVID-19 pandemic on suicide rates. *Qjm*. 2020;113(10):707-12.
18. Stevenson C, Wakefield JRH. Financial distress and suicidal behaviour during COVID-19: Family identification attenuates the negative relationship between COVID-

1  
2  
3 related financial distress and mental ill-health. *Journal of Health*  
4 *Psychology*.0(0):13591053211014597.

5 19. Behisi MA, Altaweel HM, Gassas RF, Aldehaiman M, Alkhamees AA. COVID-19  
6 Pandemic and Mental Health Status of Saudi Citizens Living Abroad. *International journal of*  
7 *environmental research and public health*. 2021;18(15).

8 20. Qualtrics. Qualtrics. Provo, Utah, USA2005.

9 21. Australian Standard Classification of Cultural and Ethnic Groups (ASCCEG) (2016).

10 22. Alderslade R, Bellman M, Rawson N, al. e. The national childhood encephalopathy  
11 study: a report on 1000 cases of serious neurologic disorders in infants and young children  
12 from the NCES research team. In: Whooping cough: reports from the Committee on the  
13 Safety of Medicines and the Joint Committee on Vaccination and Immunisation. Department  
14 of Health & Social Security, HMSO; 1981 1981. Report No.: 1-184.

15 23. Lovibond PF, Lovibond SH. The structure of negative emotional states: Comparison  
16 of the Depression Anxiety Stress Scales (DASS) with the Beck Depression and Anxiety  
17 Inventories. *Behaviour Research and Therapy*. 1995;33(3):335-43.

18 24. Traunmüller C, Stefitz R, Gaisbachgrabner K, Schwerdtfeger A. Psychological  
19 correlates of COVID-19 pandemic in the Austrian population. *BMC Public Health*.  
20 2020;20(1):1395.

21 25. IBM SPSS Statistics for Mac. 28 ed. Armonk, NY: IBM Corp.; 2021.

22 26. Kunz. RSaM. COVID-19 IMPACTS US ALL: Ensuring the safety and well-being of  
23 people  
24 on temporary visas during COVID-19.; 2020.

25 27. Tušl M, Brauchli R, Kerksieck P, Bauer GF. Impact of the COVID-19 crisis on work  
26 and private life, mental well-being and self-rated health in German and Swiss employees: a  
27 cross-sectional online survey. *BMC Public Health*. 2021;21(1):741.

28 28. Taking the pulse of the nation: Melbourne Institute's Survey of the Impact of  
29 COVID-19 in Australia. The University of Melbourne; 2020.

30 29. Xiong J, Lipsitz O, Nasri F, Lui LMW, Gill H, Phan L, et al. Impact of COVID-19  
31 pandemic on mental health in the general population: A systematic review. *J Affect Disord*.  
32 2020;277:55-64.

33 30. Stevenson C, Wakefield JRH. Financial distress and suicidal behaviour during  
34 COVID-19: Family identification attenuates the negative relationship between COVID-  
35 related financial distress and mental ill-health. *Journal of Health Psychology*.  
36 2021;26(14):2665-75.

37 31. Hammond NE, Crowe L, Abbenbroek B, Elliott R, Tian DH, Donaldson LH, et al.  
38 Impact of the coronavirus disease 2019 pandemic on critical care healthcare workers'  
39 depression, anxiety, and stress levels. *Aust Crit Care*. 2021;34(2):146-54.

40 32. Lenzo V, Quattropiani MC, Sardella A, Martino G, Bonanno GA. Depression,  
41 Anxiety, and Stress Among Healthcare Workers During the COVID-19 Outbreak and  
42 Relationships With Expressive Flexibility and Context Sensitivity. *Frontiers in Psychology*.  
43 2021;12(348).

44 33. Juchnowicz D, Baj J, Forma A, Karakuła K, Sitarz E, Bogucki J, et al. The Outbreak  
45 of SARS-CoV-2 Pandemic and the Well-Being of Polish Students: The Risk Factors of the  
46 Emotional Distress during COVID-19 Lockdown. *J Clin Med*. 2021;10(5):944.

47 34. Vala NH, Vachhani MV, Sorani AM. Study of anxiety, stress, and depression level  
48 among medical students during COVID-19 pandemic phase in Jamnagar city. *National*  
49 *Journal of Physiology, Pharmacy and Pharmacology*. 2020;10(12):1043-5.

50 35. Alam MD, Lu J, Ni L, Hu S, Xu Y. Psychological Outcomes and Associated Factors  
51 Among the International Students Living in China During the COVID-19 Pandemic.  
52 *Frontiers in Psychiatry*. 2021;12(1372).

- 1  
2  
3 36. Serafini G, Parmigiani B, Amerio A, Aguglia A, Sher L, Amore M. The  
4 psychological impact of COVID-19 on the mental health in the general population. *QJM: An*  
5 *International Journal of Medicine*. 2020;113(8):531-7.  
6  
7 37. Ozamiz-Etxebarria N, Dosil-Santamaria M, Picaza-Gorrochategui M, Idoiaga-  
8 Mondragon N. Stress, anxiety, and depression levels in the initial stage of the COVID-19  
9 outbreak in a population sample in the northern Spain. *Cad Saude Publica*.  
10 2020;36(4):e00054020.  
11  
12 38. Nwachukwu I, Nkire N, Shalaby R, Hrabok M, Vuong W, Gusnowski A, et al.  
13 COVID-19 Pandemic: Age-Related Differences in Measures of Stress, Anxiety and  
14 Depression in Canada. *Int J Environ Res Public Health*. 2020;17(17).  
15  
16 39. The Sightlines Project: seeing our way to living long & living well in 21st century  
17 America: Stanford Center on Longevity; 2016 [Available from:  
18 [https://www.soa.org/globalassets/assets/files/research/projects/research-2016-sightlines-](https://www.soa.org/globalassets/assets/files/research/projects/research-2016-sightlines-report.pdf)  
19 [report.pdf](https://www.soa.org/globalassets/assets/files/research/projects/research-2016-sightlines-report.pdf).  
20  
21 40. Harrington J. Indicators, security and sovereignty during COVID-19 in the Global  
22 South. *International Journal of Law in Context*. 2021;17(2):249-60.  
23  
24 41. International Covenant on Civil and Political Rights (16 December 1966).  
25  
26 42. Statement on travel ban and sanctions on Australians travelling from India. Australian  
27 Human Rights Commission. 2021.  
28  
29 43. Biosecurity Act Sect. 477 (2015).  
30  
31 44. Australia's India ban criticised as 'racist' rights breach. BBC News. 2021.  
32  
33 45. Hicks E. A Right to Come Home? Repatriation Rights & Policy in Australia.  
34 Melbourne: The Univeristy of Melbourne; 2021.  
35  
36  
37  
38  
39  
40  
41  
42  
43  
44  
45  
46  
47  
48  
49  
50  
51  
52  
53  
54  
55  
56  
57  
58  
59  
60

## DECLARATIONS

### Ethics approval and consent to participate

Ethical approval for this study was granted by the UNSW Human Research Ethics Committee (#210418). All participants were anonymous and indicated their consent to participate.

### Competing interests

The authors declare that they have no competing interests.

### Contribution statement

PM conducted data collection, data analysis, manuscript writing and contributed to study design. AC, MS and HS conceived study design, interpretation of the data and were involved with manuscript writing and had final oversight. KB supported the statistical analysis of the data and ST supported the interpretation and write up of the findings. All authors read and approved the final manuscript.

### Funding

Not applicable

### Data sharing

The data used in this study is available upon request from the authors.

### Supplementary information

Supplementary file 1: Associations between participant factors and levels of depression, anxiety, and stress

### Figure Legend

Figure 1. Depression, anxiety, and stress categories of citizens stranded abroad during COVID-19 (% of sample)

**Table 1. Characteristics of participants stranded during COVID-19**

| <b>Variables</b>                            | <b><i>n</i></b> | <b>%</b> |
|---------------------------------------------|-----------------|----------|
| <b>Sex recorded at birth</b>                | <b>(1054)</b>   |          |
| Female                                      | 733             | 69.5     |
| Male                                        | 308             | 29.2     |
| Another term                                | 2               | .2       |
| Prefer not to say                           | 11              | .8       |
| <b>Gender</b>                               | <b>(1054)</b>   |          |
| Female                                      | 732             | 69.4     |
| Male                                        | 304             | 28.8     |
| Another term                                | 5               | .5       |
| Prefer not to say                           | 13              | 1.2      |
| <b>Age</b>                                  | <b>(1054)</b>   |          |
| 18-29                                       | 226             | 21.4     |
| 30-49                                       | 545             | 51.7     |
| 50-69                                       | 262             | 24.9     |
| 70+                                         | 21              | 1.1      |
| <b>Main language spoken at home</b>         | <b>(1054)</b>   |          |
| English                                     | 940             | 89.2     |
| Other                                       | 83              | 7.9      |
| Spanish                                     | 11              | 1.0      |
| Urdu                                        | 7               | .7       |
| French                                      | 7               | .7       |
| Chinese                                     | 6               | .6       |
| <b>Highest level of education</b>           | <b>(1054)</b>   |          |
| Tertiary education                          | 956             | 90.7     |
| Secondary education                         | 91              | 8.6      |
| Primary education                           | 5               | .5       |
| No formal education                         | 2               | .2       |
| <b>Current employment situation</b>         | <b>(1250)</b>   |          |
| Working now for pay                         | 620             | 56.0     |
| Unemployed                                  | 240             | 21.7     |
| Other                                       | 95              | 8.6      |
| Student                                     | 88              | 7.9      |
| Live with parents/guardians                 | 86              | 8.0      |
| Stay at home parent/caregiver               | 84              | 7.6      |
| Retired                                     | 82              | 7.4      |
| Volunteer                                   | 23              | 2.1      |
| Unable to work due to disability or illness | 18              | 1.6      |
| <b>Ethnicity</b>                            | <b>(1054)</b>   |          |
| North-West European                         | 462             | 43.8     |
| Oceanian                                    | 242             | 23       |
| Unsure                                      | 134             | 12.7     |

|    |                                                                                         |                                  |               |
|----|-----------------------------------------------------------------------------------------|----------------------------------|---------------|
| 1  |                                                                                         |                                  |               |
| 2  |                                                                                         |                                  |               |
| 3  |                                                                                         | South-East Asian                 | 70 6.6        |
| 4  |                                                                                         | Southern and Eastern European    | 68 6.5        |
| 5  |                                                                                         | Southern and Central Asian       | 27 2.6        |
| 6  |                                                                                         | People of the Americas           | 26 2.5        |
| 7  |                                                                                         | North-East Asian                 | 11 1.0        |
| 8  |                                                                                         | North African and Middle Eastern | 10 .9         |
| 9  |                                                                                         | Sub-Saharan African              | 4 .4          |
| 10 |                                                                                         |                                  |               |
| 11 |                                                                                         |                                  |               |
| 12 | <b>Usual country of residence</b>                                                       |                                  | <b>(1341)</b> |
| 13 |                                                                                         | WPR                              | 1011 75.4     |
| 14 |                                                                                         | EUR                              | 176 13.1      |
| 15 |                                                                                         | AMR                              | 93 6.9        |
| 16 |                                                                                         | SEAR                             | 29 2.2        |
| 17 |                                                                                         | EMR                              | 25 1.9        |
| 18 |                                                                                         | AFR                              | 7 .5          |
| 19 |                                                                                         |                                  |               |
| 20 | <b>Country where stranded</b>                                                           |                                  | <b>(1341)</b> |
| 21 |                                                                                         | EUR                              | 608 45.3      |
| 22 |                                                                                         | WPR                              | 311 23.2      |
| 23 |                                                                                         | AMR                              | 238 17.7      |
| 24 |                                                                                         | EMR                              | 79 5.9        |
| 25 |                                                                                         | SEAR                             | 78 5.8        |
| 26 |                                                                                         | AFR                              | 27 2.0        |
| 27 |                                                                                         |                                  |               |
| 28 | <b>Initial reason for leaving</b>                                                       |                                  | <b>(1245)</b> |
| 29 | <b>country of residence</b>                                                             |                                  |               |
| 30 |                                                                                         | Long-term employment             | 550 44.2      |
| 31 |                                                                                         | Other                            | 272 21.8      |
| 32 |                                                                                         | Visiting family or friends       | 260 20.9      |
| 33 |                                                                                         | Travel to study overseas         | 72 5.8        |
| 34 |                                                                                         | Travel for business              | 54 4.3        |
| 35 |                                                                                         | Tourism                          | 37 3.0        |
| 36 |                                                                                         |                                  |               |
| 37 |                                                                                         |                                  |               |
| 38 | <b>AFR, African Region; AMR, Region of the Americas; SEAR, South-East Asian Region;</b> |                                  |               |
| 39 | <b>EUR, European Region; EMR, Eastern Mediterranean Region; WPR, Western Pacific</b>    |                                  |               |
| 40 | <b>Region</b>                                                                           |                                  |               |
| 41 |                                                                                         |                                  |               |
| 42 |                                                                                         |                                  |               |
| 43 |                                                                                         |                                  |               |
| 44 |                                                                                         |                                  |               |
| 45 |                                                                                         |                                  |               |
| 46 |                                                                                         |                                  |               |
| 47 |                                                                                         |                                  |               |
| 48 |                                                                                         |                                  |               |
| 49 |                                                                                         |                                  |               |
| 50 |                                                                                         |                                  |               |
| 51 |                                                                                         |                                  |               |
| 52 |                                                                                         |                                  |               |
| 53 |                                                                                         |                                  |               |
| 54 |                                                                                         |                                  |               |
| 55 |                                                                                         |                                  |               |
| 56 |                                                                                         |                                  |               |
| 57 |                                                                                         |                                  |               |
| 58 |                                                                                         |                                  |               |
| 59 |                                                                                         |                                  |               |
| 60 |                                                                                         |                                  |               |

**Table 2. Travel experiences of participants stranded abroad during COVID-19**

| <b>Variables</b>                                              | <b><i>n</i></b> | <b>%</b> |
|---------------------------------------------------------------|-----------------|----------|
| <b>Time stranded abroad</b>                                   | <b>(1341)</b>   |          |
| <1 month                                                      | 89              | 6.6      |
| 1-2 months                                                    | 91              | 6.8      |
| 2-3 months                                                    | 128             | 9.5      |
| 3-5 months                                                    | 98              | 7.3      |
| >5 months                                                     | 853             | 63.6     |
| No wait                                                       | 82              | 6.1      |
| <b>Number of flight cancellation/changes</b>                  | <b>(1245)</b>   |          |
| Not applicable                                                | 319             | 25.6     |
| 0 changes                                                     | 152             | 12.2     |
| 1 cancellation or delay                                       | 245             | 19.7     |
| 2 cancellation or delay                                       | 196             | 15.7     |
| 3 cancellation or delay                                       | 147             | 11.8     |
| 4 cancellation or delay                                       | 65              | 5.2      |
| 5 cancellation or delay                                       | 31              | 2.5      |
| >5 cancellations or delays                                    | 90              | 7.2      |
| <b>Experiences while trying to return</b>                     | <b>(1245)</b>   |          |
| Limit on the number of people who could enter the country     | 740             | 59.4     |
| Inability to book a flight                                    | 671             | 53.9     |
| Flight cancellation                                           | 660             | 15.3     |
| COVID-19 testing requirements prior to flying                 | 281             | 22.6     |
| Other                                                         | 229             | 18.4     |
| Separation from family/companion                              | 172             | 13.8     |
| Visa issues                                                   | 147             | 11.8     |
| Delays during transit                                         | 44              | 3.5      |
| <b>Current situation</b>                                      | <b>(1245)</b>   |          |
| Booked a flight/waiting for flight availability               | 357             | 26.6     |
| Unable to return but have decided to stay                     | 352             | 26.2     |
| Returned to country of residence after delays                 | 323             | 24.1     |
| Other                                                         | 295             | 22       |
| Returned to country of residence after being stuck in transit | 14              | 1        |

**Table 3. Financial and employment characteristics of participants stranded abroad during COVID-19**

| <b>Variables</b>                                                                                     | <b><i>n</i></b> | <b>%</b> |
|------------------------------------------------------------------------------------------------------|-----------------|----------|
| <b>Addressing financial stress</b>                                                                   | <b>(763)</b>    |          |
| Received financial support from family or friends                                                    | 354             | 46.4     |
| Borrowed money from a bank                                                                           | 58              | 7.6      |
| Received a government loan to cover your living costs                                                | 14              | 1.8      |
| Received a government loan to cover the cost of a flight home                                        | 8               | 1        |
| Accessed emergency financial support from the organisation or services in the country you were stuck | 43              | 5.6      |
| Received financial support from an insurance company                                                 | 6               | .8       |
| Received financial support from your employer                                                        | 39              | 5.1      |
| Applied but did not receive a government loan                                                        | 39              | 5.1      |
| Personal savings                                                                                     | 47              | 6.2      |
| Early withdrawal of superannuation                                                                   | 27              | 3.5      |
| Other                                                                                                | 128             | 16.8     |
| <b>Current employment situation</b>                                                                  | <b>(1250)</b>   |          |
| Working now for pay                                                                                  | 620             | 56.0     |
| Unemployed                                                                                           | 240             | 21.7     |
| Retired                                                                                              | 82              | 7.4      |
| Student                                                                                              | 88              | 7.9      |
| Unable to work due to disability or illness                                                          | 18              | 1.6      |
| Volunteer                                                                                            | 23              | 2.1      |
| Stay at home parent/caregiver                                                                        | 84              | 7.6      |
| Other                                                                                                | 95              | 8.6      |
| <b>Employment change while abroad</b>                                                                | <b>(717)</b>    |          |
| Worked remotely                                                                                      | 123             | 17.2     |
| Lost job                                                                                             | 119             | 16.6     |
| Stood down, not working for pay, but not fired                                                       | 45              | 6.3      |
| Pay cut                                                                                              | 32              | 4.5      |
| Reduction of hours                                                                                   | 63              | 8.8      |
| Not working but receiving government assistance                                                      | 27              | 3.8      |
| Back in paid work                                                                                    | 31              | 4.3      |
| Resigned                                                                                             | 77              | 10.7     |
| Contract not renewed                                                                                 | 69              | 9.6      |
| Increase in hours                                                                                    | 18              | 2.5      |
| Other                                                                                                | 113             | 15.8     |



**Table 4. Predictors of moderate to extremely severe depression, anxiety, and stress in participants stranded abroad during COVID-19 (n=956)**

| Variables                         | Depression |         |                 | Anxiety     |         |                 | Stress |                 |             |       |       |                 |
|-----------------------------------|------------|---------|-----------------|-------------|---------|-----------------|--------|-----------------|-------------|-------|-------|-----------------|
|                                   | OR         | 95% C.I | <i>p</i>        | OR          | 95% C.I | <i>p</i>        | OR     | 95% C.I         | <i>p</i>    |       |       |                 |
| <b>Age (yrs)</b>                  |            |         | <b>.005</b>     |             |         | <b>.030</b>     |        |                 | <b>.007</b> |       |       |                 |
| 18-29*                            |            |         |                 |             |         |                 |        |                 |             |       |       |                 |
| 30-49                             | .535       | .366    | .780            | .646        | .461    | .906            | .644   | .452            | .917        |       |       |                 |
| 50-69                             | .542       | .350    | .839            | .563        | .375    | .845            | .579   | .383            | .873        |       |       |                 |
| >69                               | .303       | .097    | .945            | .767        | .238    | 2.407           | .174   | .046            | .660        |       |       |                 |
| <b>Perceived risk of COVID-19</b> |            |         | <b>.026</b>     |             |         | <b>.003</b>     |        |                 | <b>.003</b> |       |       |                 |
| Not applicable                    | 1.595      | .384    | 6.627           | 1.608       | .433    | 5.840           | 2.317  | .573            | 9.368       |       |       |                 |
| Low risk*                         |            |         |                 |             |         |                 |        |                 |             |       |       |                 |
| Moderate risk                     | 1.099      | .723    | 1.672           | .700        | .456    | 1.076           | 1.042  | .691            | 1.571       |       |       |                 |
| High risk                         | 1.617      | 1.147   | 2.279           | 1.364       | .973    | 1.912           | 1.708  | 1.223           | 2.387       |       |       |                 |
| <b>Time stranded</b>              |            |         | <b>&lt;.001</b> |             |         | <b>&lt;.001</b> |        |                 | <b>.003</b> |       |       |                 |
| No wait                           | .893       | .399    | 1.997           | .697        | .308    | 1.579           | .936   | .421            | 2.082       |       |       |                 |
| <1 month                          | .357       | .174    | .735            | .332        | .149    | .738            | .459   | .224            | .940        |       |       |                 |
| 1-2 months                        | .396       | .201    | .781            | .420        | .208    | .849            | .475   | .242            | .932        |       |       |                 |
| 2-3 months                        | .587       | .313    | 1.101           | .571        | .303    | 1.078           | .702   | .377            | 1.308       |       |       |                 |
| 3-5 months*                       |            |         |                 |             |         |                 |        |                 |             |       |       |                 |
| >5 months                         | 1.281      | .770    | 2.129           | .984        | .601    | 1.610           | 1.062  | .647            | 1.743       |       |       |                 |
| <b>Homelessness, ref.no</b>       | 1.522      | .947    | 2.444           | .082        | 1.392   | .920            | 2.105  | .118            | 1.186       | .767  | 1.834 | .444            |
| <b>Employment Change, ref.no</b>  | 1.405      | 1.040   | 1.900           | <b>.027</b> | 1.569   | 1.177           | 2.092  | <b>.002</b>     | 1.564       | 1.171 | 2.090 | <b>.002</b>     |
| <b>Financial Stress, ref.no</b>   | 1.501      | 1.103   | 2.041           | <b>.010</b> | 1.728   | 1.268           | 2.345  | <b>&lt;0.00</b> | 1.682       | 1.246 | 2.269 | <b>&lt;.001</b> |

1

\*Reference variable

OR, log odds ratio controlling for other variables in the model; EXP (B), adjusted odds ratio; C.I, confidence interval; *p*, probability value (statistically significant <.05).

1  
2  
3  
4  
5  
6  
7  
8  
9  
10  
11  
12  
13  
14  
15  
16  
17  
18  
19  
20  
21  
22  
23  
24  
25  
26  
27  
28  
29  
30  
31  
32  
33  
34  
35  
36  
37  
38  
39  
40  
41  
42  
43  
44  
45  
46  
47  
48  
49  
50  
51  
52  
53  
54  
55  
56  
57  
58  
59  
60

For peer review only

1  
2  
3  
4  
5  
6  
7  
8  
9  
10  
11  
12  
13  
14  
15  
16  
17  
18  
19  
20  
21  
22  
23  
24  
25  
26  
27  
28  
29  
30  
31  
32  
33  
34  
35  
36  
37  
38  
39  
40  
41  
42  
43  
44  
45  
46  
47  
48  
49  
50  
51  
52  
53  
54  
55  
56  
57  
58  
59  
60

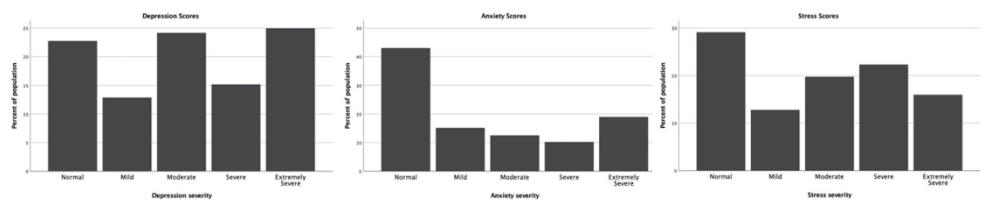

Depression, anxiety, and stress categories of citizens stranded abroad during COVID-19 (% of sample)

427x94mm (144 x 144 DPI)

## Supplementary file 1. Associations between participant factors and levels of depression, anxiety, and stress

| Variables                              | Depression  |             |             |             |                  | $\chi^2$ | df | p     |
|----------------------------------------|-------------|-------------|-------------|-------------|------------------|----------|----|-------|
|                                        | Normal      | Mild        | Moderate    | Severe      | Extremely Severe |          |    |       |
| <b>Age</b>                             |             |             |             |             |                  | 33.482   | 12 | <.001 |
| 18-29                                  | 38 (15.4%)  | 19 (14.4%)  | 55 (21.7%)  | 41 (25.8%)  | 73 (27.8%)       |          |    |       |
| 30-49                                  | 121 (49.2%) | 79 (59.8%)  | 131 (51.6%) | 77 (48.4%)  | 137 (52.1%)      |          |    |       |
| 50-69                                  | 76 (30.9%)  | 33 (25%)    | 64 (25.2%)  | 38 (23.9%)  | 51 (19.4%)       |          |    |       |
| 70+                                    | 11 (4.5%)   | 1 (0.8%)    | 4 (1.6%)    | 3 (1.9%)    | 2 (0.8%)         |          |    |       |
| <b>Time stranded abroad</b>            |             |             |             |             |                  | 82.982   | 20 | <.001 |
| No wait                                | 20 (7.8%)   | 4 (2.7%)    | 12 (4.4%)   | 6 (3.5%)    | 11 (3.9%)        |          |    |       |
| Up to 1 month                          | 32 (12.4%)  | 16 (11%)    | 14 (5.1%)   | 5 (2.9%)    | 7 (2.5%)         |          |    |       |
| 1-2 months                             | 32 (12.4%)  | 10 (6.8%)   | 23 (8.4%)   | 7 (4.1%)    | 8 (2.8%)         |          |    |       |
| 2-3 months                             | 32 (12.4%)  | 18 (12.3%)  | 22 (8%)     | 22 (12.8%)  | 23 (8.1%)        |          |    |       |
| 4-5 months                             | 21 (8.1%)   | 15 (10.3%)  | 22 (8%)     | 15 (8.7%)   | 21 (7.4%)        |          |    |       |
| 5+ months                              | 121 (46.9%) | 83 (56.8%)  | 181 (66.1%) | 117 (68%)   | 213 (75.3%)      |          |    |       |
| <b>Financial stress</b>                |             |             |             |             |                  | 35.123   | 4  | <.001 |
| Yes                                    | 140 (54.3%) | 85 (58.6%)  | 172 (63%)   | 109 (64.1%) | 218 (77.6%)      |          |    |       |
| No                                     | 118 (45.7%) | 60 (41.4%)  | 101 (37%)   | 61 (35.9%)  | 63 (22.4%)       |          |    |       |
| <b>Homelessness</b>                    |             |             |             |             |                  | 30.149   | 4  | <.001 |
| Yes                                    | 17 (6.6%)   | 16 (11.3%)  | 26 (9.7%)   | 16 (9.5%)   | 58 (20.9%)       |          |    |       |
| No                                     | 239 (93.4%) | 125 (88.7%) | 243 (90.3%) | 152 (90.5%) | 220 (79.1%)      |          |    |       |
| <b>Employment Change</b>               |             |             |             |             |                  | 22.648   | 4  | <.001 |
| Yes                                    | 89 (38.2%)  | 45 (34.9%)  | 107 (43.5%) | 74 (49%)    | 138 (55.9%)      |          |    |       |
| No                                     | 144 (61.8%) | 84 (65.1%)  | 139 (56.5%) | 77 (51%)    | 109 (44.1%)      |          |    |       |
| <b>Flight changes or cancellations</b> |             |             |             |             |                  | 36.694   | 24 | .029  |
| 0 changes                              | 23 (11.5%)  | 21 (20%)    | 31 (17.3%)  | 21 (16.9%)  | 26 (12.9%)       |          |    |       |
| 1 cancelation or delay                 | 70 (35%)    | 28 (26.7%)  | 48 (26.8%)  | 34 (27.4%)  | 34 (16.8%)       |          |    |       |

|                                                            |               |             |                 |               |                         |                            |           |                 |
|------------------------------------------------------------|---------------|-------------|-----------------|---------------|-------------------------|----------------------------|-----------|-----------------|
| 2 cancelations or delay                                    | 42 (21%)      | 20 (19%)    | 34 (19%)        | 30 (24.2%)    | 45 (22.3%)              |                            |           |                 |
| 3 cancelations or delay                                    | 30 (15%)      | 18 (17.1%)  | 32 (17.9%)      | 21 (16.9%)    | 32 (15.8%)              |                            |           |                 |
| 4 cancelations or delay                                    | 14 (7%)       | 6 (5.7%)    | 13 (7.3%)       | 6 (4.8%)      | 19 (9.4%)               |                            |           |                 |
| 5 cancelations or delay                                    | 4 (2%)        | 3 (2.9%)    | 5 (2.8%)        | 3 (2.4%)      | 13 (6.4%)               |                            |           |                 |
| 5+ cancelations or delay                                   | 17 (8.5%)     | 9 (8.6%)    | 16 (8.9%)       | 9 (7.3%)      | 33 (16.3%)              |                            |           |                 |
| <b>Perceived risk of contracting COVID-19 (1-10 scale)</b> |               |             |                 |               |                         |                            |           |                 |
| 1                                                          | 29 (11.2%)    | 13 (8.9%)   | 21 (7.7%)       | 8 (4.7%)      | 20 (7.1%)               |                            |           |                 |
| 2                                                          | 34 (13.2%)    | 10 (6.8%)   | 12 (4.4%)       | 6 (3.5%)      | 14 (4.9%)               |                            |           |                 |
| 3                                                          | 25 (9.7%)     | 11 (7.5%)   | 21 (7.7%)       | 14 (8.1%)     | 17 (6%)                 |                            |           |                 |
| 4                                                          | 13 (5%)       | 7 (4.8%)    | 12 (4.4%)       | 6 (3.5%)      | 12 (4.2%)               |                            |           |                 |
| 5                                                          | 31 (12%)      | 19 (13%)    | 21 (7.7%)       | 16 (9.3%)     | 24 (8.5%)               |                            |           |                 |
| 6                                                          | 10 (3.9%)     | 8 (5.5%)    | 19 (6.9%)       | 11 (6.4%)     | 13 (4.6%)               |                            |           |                 |
| 7                                                          | 28 (10.9%)    | 16 (11%)    | 35 (12.8%)      | 19 (11%)      | 29 (10.2%)              |                            |           |                 |
| 8                                                          | 30 (11.6%)    | 14 (9.6%)   | 35 (12.8%)      | 31 (18%)      | 40 (14.1%)              |                            |           |                 |
| 9                                                          | 14 (5.4%)     | 12 (8.2%)   | 17 (6.2%)       | 5 (2.9%)      | 21 (7.4%)               |                            |           |                 |
| 10                                                         | 42 (16.3%)    | 32 (21.9%)  | 75 (27.4%)      | 51 (29.7%)    | 83 (29.3%)              |                            |           |                 |
| Not Applicable                                             | 2 (0.8%)      | 4 (2.7%)    | 6 (2.2%)        | 5 (2.9%)      | 10 (3.5%)               | 3.314                      | 4         | .507            |
| <b>Access to crisis support or mental health services</b>  |               |             |                 |               |                         |                            |           |                 |
| Yes                                                        | 95 (36.8%)    | 55 (37.7%)  | 109 (39.8%)     | 63 (36.6%)    | 92 (32.5%)              |                            |           |                 |
| No                                                         | 163 (63.2%)   | 91 (62.35)  | 165 (60.2%)     | 109 (63.4%)   | 191 (67.5%)             |                            |           |                 |
| <b>Anxiety</b>                                             |               |             |                 |               |                         |                            |           |                 |
| <b>Variables</b>                                           | <b>Normal</b> | <b>Mild</b> | <b>Moderate</b> | <b>Severe</b> | <b>Extremely Severe</b> | <b><math>\chi^2</math></b> | <b>df</b> | <b><i>p</i></b> |
| <b>Age</b>                                                 |               |             |                 |               |                         | 35.225                     | 12        | <.001           |
| 18-29                                                      | 69 (15.4%)    | 36 (22.5%)  | 35 (25.7%)      | 36 (32.7%)    | 50 (25.1%)              |                            |           |                 |
| 30-49                                                      | 229 (51%)     | 86 (53.8%)  | 66 (48.55)      | 52 (47.3%)    | 112 (56.3%)             |                            |           |                 |
| 50-69                                                      | 138 (30.7%)   | 35 (21.9%)  | 32 (23.5%)      | 21 (19.1%)    | 36 (18.1%)              |                            |           |                 |
| 70+                                                        | 13 (2.9%)     | 3 (1.9%)    | 3 (2.2%)        | 1 (0.9%)      | 1 (0.5%)                |                            |           |                 |

|                                                           |             |             |             |             |             |        |    |       |
|-----------------------------------------------------------|-------------|-------------|-------------|-------------|-------------|--------|----|-------|
| <b>Time stranded abroad</b>                               |             |             |             |             |             | 49.486 | 20 | <.001 |
| No wait                                                   | 22 (4.5%)   | 12 (7%)     | 9 (6.3%)    | 3 (2.6%)    | 7 (3.3%)    |        |    |       |
| Up to 1 month                                             | 51 (10.5%)  | 8 (4.7%)    | 7 (4.9%)    | 3 (2.6%)    | 5 (2.3%)    |        |    |       |
| 1-2 months                                                | 43 (8.8%)   | 12 (7%)     | 6 (4.2%)    | 10 (8.6%)   | 9 (4.2%)    |        |    |       |
| 2-3 months                                                | 55 (11.3%)  | 20 (11.6%)  | 11 (7.7%)   | 15 (12.9%)  | 16 (7.4%)   |        |    |       |
| 4-5 months                                                | 38 (7.8%)   | 15 (8.7%)   | 17 (12.0%)  | 5 (4.3%)    | 19 (8.8%)   |        |    |       |
| 5+ months                                                 | 279 (57.2%) | 105 (61%)   | 92 (64.8%)  | 80 (69%)    | 7 (3.3%)    |        |    |       |
| <b>Financial stress</b>                                   |             |             |             |             |             | 53.944 | 4  | <.001 |
| Yes                                                       | 258 (53.2%) | 114 (66.3%) | 97 (68.8%)  | 85 (73.3%)  | 170 (79.8%) |        |    |       |
| No                                                        | 227 (46.8%) | 58 (33.7%)  | 44 (31.2%)  | 31 (26.7%)  | 43 (20.2%)  |        |    |       |
| <b>Homelessness</b>                                       |             |             |             |             |             | 18.517 | 4  | <.001 |
| Yes                                                       | 44 (9.2%)   | 15 (8.9%)   | 16 (11.4%)  | 16 (13.8%)  | 42 (20.1%)  |        |    |       |
| No                                                        | 434 (90.8%) | 154 (91.1%) | 124 (88.6%) | 100 (86.2%) | 167 (79.9%) |        |    |       |
| <b>Employment Change</b>                                  |             |             |             |             |             | 34.917 | 4  | <.001 |
| Yes                                                       | 156 (35.7%) | 66 (44.6%)  | 65 (50%)    | 57 (52.8%)  | 109 (59.6%) |        |    |       |
| No                                                        | 281 (64.3%) | 82 (55.4%)  | 65 (50%)    | 51 (47.2%)  | 74 (40.4%)  |        |    |       |
| <b>Flight changes or cancellations</b>                    |             |             |             |             |             | 29.009 | 24 | .220  |
| 0 changes                                                 | 50 (14.3%)  | 16 (13.7%)  | 19 (19.4%)  | 15 (17.2%)  | 22 (13.8%)  |        |    |       |
| 1 cancelation or delay                                    | 110 (31.5%) | 27 (23.1%)  | 21 (21.4%)  | 23 (26.4%)  | 33 (20.8%)  |        |    |       |
| 2 cancelations or delay                                   | 79 (22.6%)  | 23 (19.7%)  | 15 (15.3%)  | 13 (14.9%)  | 41 (25.8%)  |        |    |       |
| 3 cancelations or delay                                   | 48 (13.8%)  | 23 (19.7%)  | 22 (22.4%)  | 19 (21.8%)  | 21 (13.2%)  |        |    |       |
| 4 cancelations or delay                                   | 21 (6%)     | 9 (7.7%)    | 8 (8.2%)    | 7 (8%)      | 13 (8.2%)   |        |    |       |
| 5 cancelations or delay                                   | 9 (2.6%)    | 7 (6%)      | 2 (2%)      | 2 (2.3%)    | 8 (5%)      |        |    |       |
| 5+ cancelations or delay                                  | 32 (9.2%)   | 12 (10.3%)  | 11 (11.2%)  | 8 (9.2%)    | 21 (13.2%)  |        |    |       |
| <b>Perceived risk of contracted COVID-19 (1-10 scale)</b> |             |             |             |             |             | 81.128 | 40 | <.001 |
| 1                                                         | 47 (9.6%)   | 8 (4.7%)    | 12 (8.5%)   | 9 (7.8%)    | 15 (7%)     |        |    |       |
| 2                                                         | 49 (10%)    | 5 (2.9%)    | 7 (4.9%)    | 1 (0.9%)    | 14 (6.5%)   |        |    |       |

|                                                           |               |             |                 |               |                         |                            |           |                 |
|-----------------------------------------------------------|---------------|-------------|-----------------|---------------|-------------------------|----------------------------|-----------|-----------------|
| 3                                                         | 43 (8.8%)     | 11 (6.4%)   | 14 (9.9%)       | 6 (5.2%)      | 14 (6.5%)               |                            |           |                 |
| 4                                                         | 20 (4.1%)     | 14 (8.1%)   | 7 (4.9%)        | 2 (1.7%)      | 7 (3.3%)                |                            |           |                 |
| 5                                                         | 62 (12.7%)    | 13 (7.6%)   | 8 (5.6%)        | 9 (7.8%)      | 19 (8.8%)               |                            |           |                 |
| 6                                                         | 25 (5.1%)     | 13 (7.6%)   | 9 (6.3%)        | 5 (4.3%)      | 9 (4.2%)                |                            |           |                 |
| 7                                                         | 62 (12.7%)    | 15 (8.7%)   | 13 (9.2%)       | 17 (14.7%)    | 20 (9.3%)               |                            |           |                 |
| 8                                                         | 54 (11.1%)    | 32 (18.6%)  | 20 (14.1%)      | 15 (12.9%)    | 29 (13.5%)              |                            |           |                 |
| 9                                                         | 24 (4.9%)     | 17 (9.9%)   | 10 (7%)         | 7 (6%)        | 11 (5.1%)               |                            |           |                 |
| 10                                                        | 92 (18.9%)    | 39 (22.7%)  | 39 (27.5%)      | 41 (35.3%)    | 72 (33.5%)              |                            |           |                 |
| Not applicable                                            | 10 (2%)       | 5 (2.9%)    | 3 (2.1%)        | 4 (3.4%)      | 5 (2.3%)                |                            |           |                 |
| <b>Access to crisis support or mental health services</b> |               |             |                 |               |                         | 2.210                      | 4         | .697            |
| Yes                                                       | 188 (38.5%)   | 59 (34.3%)  | 49 (34.5%)      | 38 (32.8%)    | 80 (37.2%)              |                            |           |                 |
| No                                                        | 300 (61.5%)   | 113 (65.7%) | 93 (65.5%)      | 78 (67.2%)    | 135 (62.8%)             |                            |           |                 |
|                                                           | <b>Stress</b> |             |                 |               |                         |                            |           |                 |
| <b>Variables</b>                                          | <b>Normal</b> | <b>Mild</b> | <b>Moderate</b> | <b>Severe</b> | <b>Extremely Severe</b> | <b><math>\chi^2</math></b> | <b>df</b> | <b><i>p</i></b> |
| <b>Age</b>                                                |               |             |                 |               |                         | 51.326                     | 12        | <.001           |
| 18-29                                                     | 47 (15%)      | 23 (17.2%)  | 44 (21.3%)      | 69 (29.9%)    | 43 (25.4%)              |                            |           |                 |
| 30-49                                                     | 154 (49.2%)   | 76 (56.7%)  | 106 (51.2%)     | 113 (48.9%)   | 96 (56.8%)              |                            |           |                 |
| 50-69                                                     | 96 (30.7%)    | 34 (25.4%)  | 56 (27.1%)      | 46 (19.9%)    | 30 (17.8%)              |                            |           |                 |
| 70+                                                       | 16 (5.1%)     | 1 (0.7%)    | 1 (0.5%)        | 3 (1.3%)      | 0                       |                            |           |                 |
| <b>Time stranded abroad</b>                               |               |             |                 |               |                         | 50.180                     | 20        | <.001           |
| No wait                                                   | 22 (6.7%)     | 3 (2.1%)    | 12 (5.4%)       | 12 (4.7%)     | 4 (2.2%)                |                            |           |                 |
| Up to 1 month                                             | 38 (11.5%)    | 9 (6.2%)    | 9 (4%)          | 13 (5.1%)     | 5 (2.8%)                |                            |           |                 |
| 1-2 months                                                | 27 (8.2%)     | 15 (10.3%)  | 16 (7.1%)       | 16 (6.3%)     | 6 (3.3%)                |                            |           |                 |
| 2-3 months                                                | 36 (10.9%)    | 15 (10.3%)  | 23 (10.3%)      | 30 (11.9%)    | 13 (7.2%)               |                            |           |                 |
| 4-5 months                                                | 28 (8.5%)     | 11 (7.6%)   | 17 (7.6%)       | 27 (10.7%)    | 11 (6.1%)               |                            |           |                 |
| 5+ months                                                 | 179(54.2%)    | 92 (63.4%)  | 147 (65.6%)     | 155 (61.3%)   | 142 (78.5%)             |                            |           |                 |
| <b>Financial stress</b>                                   |               |             |                 |               |                         | 40.368                     | 4         | <.001           |
| Yes                                                       | 176 (53.5%)   | 85 (58.6%)  | 146 (65.8%)     | 174 (69%)     | 143(79.9%)              |                            |           |                 |

|                                                           |             |             |             |             |             |        |    |       |
|-----------------------------------------------------------|-------------|-------------|-------------|-------------|-------------|--------|----|-------|
| No                                                        | 153 (46.5%) | 60(41.4%)   | 76 (34.2%)  | 78 (31%)    | 36 (20.1%)  |        |    |       |
| <b>Homelessness</b>                                       |             |             |             |             |             | 13.393 | 4  | .010  |
| Yes                                                       | 28 (8.5%)   | 15 (10.7%)  | 24 (10.9%)  | 32 (13%)    | 34 (19.3%)  |        |    |       |
| No                                                        | 300 (91.5%) | 125 (89.3%) | 197 (89.1%) | 215 (87%)   | 142 (80.7%) |        |    |       |
| <b>Employment Change</b>                                  |             |             |             |             |             | 31.232 | 4  | <.001 |
| Yes                                                       | 101 (33.8%) | 50 (40.7%)  | 96 (47.1%)  | 113 (51.4%) | 93 (58.1%)  |        |    |       |
| No                                                        | 198 (66.2%) | 73 (59.3%)  | 108 (52.9%) | 107 (48.6%) | 67 (41.9%)  |        |    |       |
| <b>Flight changes or cancellations</b>                    |             |             |             |             |             | 27.073 | 24 | .301  |
| 0 changes                                                 | 28 (11.5%)  | 15 (15%)    | 28 (18.8%)  | 31 (17%)    | 20 (14.8%)  |        |    |       |
| 1 cancelation or delay                                    | 79 (32.4%)  | 26 (26%)    | 43 (28.9%)  | 42 (23.1%)  | 24 (17.8%)  |        |    |       |
| 2 cancelations or delay                                   | 56 (23%)    | 21 (21%)    | 31 (20.8%)  | 36 (19.8%)  | 27 (20%)    |        |    |       |
| 3 cancelations or delay                                   | 36 (14.8%)  | 18 (18%)    | 24 (16.1%)  | 32 (17.6%)  | 23 (17%)    |        |    |       |
| 4 cancelations or delay                                   | 16 (6.6%)   | 6 (6%)      | 11 (7.4%)   | 14 (7.7%)   | 11 (8.1%)   |        |    |       |
| 5 cancelations or delay                                   | 9 (3.7%)    | 2 (2%)      | 2 (1.3%)    | 7 (3.8%)    | 8 (5.9%)    |        |    |       |
| 5+ cancelations or delay                                  | 20 (8.2%)   | 12 (12%)    | 10 (6.7%)   | 20 (11%)    | 22 (16.3%)  |        |    |       |
| <b>Perceived risk of contracted COVID-19 (1-10 scale)</b> |             |             |             |             |             | 66.487 | 40 | .005  |
| 1                                                         | 35 (10.6%)  | 11 (7.6%)   | 14 (6.3%)   | 16 (6.3%)   | 15 (8.3%)   |        |    |       |
| 2                                                         | 34 (10.3%)  | 10 (6.9%)   | 14 (6.3%)   | 11 (4.3%)   | 7 (3.9%)    |        |    |       |
| 3                                                         | 28 (8.5%)   | 14 (9.7%)   | 18 (8%)     | 20 (7.9%)   | 8 (4.4%)    |        |    |       |
| 4                                                         | 17 (5.2%)   | 7 (4.8%)    | 7 (3.1%)    | 13 (5.1%)   | 6 (3.3%)    |        |    |       |
| 5                                                         | 40 (12.1%)  | 15 (10.3%)  | 22 (9.8%)   | 19 (7.5%)   | 15 (8.35)   |        |    |       |
| 6                                                         | 21 (6.4%)   | 6 (4.1%)    | 12 (5.4%)   | 13 (5.1%)   | 9 (5%)      |        |    |       |
| 7                                                         | 34 (10.3%)  | 26 (17.9%)  | 24 (10.7%)  | 27 (10.7%)  | 16 (8.8%)   |        |    |       |
| 8                                                         | 41 (12.4%)  | 18 (12.4%)  | 35 (15.6%)  | 30 (11.9%)  | 26 (14.4%)  |        |    |       |
| 9                                                         | 14 (4.2%)   | 10 (6.9%)   | 20 (8.9%)   | 18 (7.1%)   | 7 (3.9%)    |        |    |       |
| 10                                                        | 62 (18.8%)  | 25 (17.2%)  | 53 (23.7%)  | 78 (30.8%)  | 65 (35.9%)  |        |    |       |
| Not applicable                                            | 4 (1.2%)    | 3 (2.1%)    | 5 (2.2%)    | 8 (3.2%)    | 7 (3.9%)    |        |    |       |



1  
2  
3  
4  
5  
6  
7  
8  
9  
10  
11  
12  
13  
14  
15  
16  
17  
18  
19  
20  
21  
22  
23  
24  
25  
26  
27  
28  
29  
30  
31  
32  
33  
34  
35  
36  
37  
38  
39  
40  
41  
42  
43  
44  
45  
46

|                                                                                                                                   |             |            |             |             |             |       |   |      |
|-----------------------------------------------------------------------------------------------------------------------------------|-------------|------------|-------------|-------------|-------------|-------|---|------|
| <b>Access to crisis support or mental health services</b>                                                                         |             |            |             |             |             | 3.371 | 4 | .498 |
| Yes                                                                                                                               | 113 (34.2%) | 60 (41.4%) | 82 (36.6%)  | 98 (38.7%)  | 61 (33.7%)  |       |   |      |
| No                                                                                                                                | 217 (65.8%) | 85 (58.6%) | 142 (63.4%) | 155 (61.3%) | 120 (66.3%) |       |   |      |
| <b><math>\chi^2</math>, chi squared; df, degrees of freedom; <i>p</i>, probability value (statistically significant &lt;.05).</b> |             |            |             |             |             |       |   |      |

For peer review only

STROBE Statement—Checklist of items that should be included in reports of *cross-sectional studies*

|                              | Item No | Recommendation                                                                                                                                                                                               | Page No |
|------------------------------|---------|--------------------------------------------------------------------------------------------------------------------------------------------------------------------------------------------------------------|---------|
| <b>Title and abstract</b>    | 1       | (a) Indicate the study's design with a commonly used term in the title or the abstract                                                                                                                       | 2       |
|                              |         | (b) Provide in the abstract an informative and balanced summary of what was done and what was found                                                                                                          | 2       |
| <b>Introduction</b>          |         |                                                                                                                                                                                                              |         |
| Background/rationale         | 2       | Explain the scientific background and rationale for the investigation being reported                                                                                                                         | 3       |
| Objectives                   | 3       | State specific objectives, including any prespecified hypotheses                                                                                                                                             | 3       |
| <b>Methods</b>               |         |                                                                                                                                                                                                              |         |
| Study design                 | 4       | Present key elements of study design early in the paper                                                                                                                                                      | 4       |
| Setting                      | 5       | Describe the setting, locations, and relevant dates, including periods of recruitment, exposure, follow-up, and data collection                                                                              | 4       |
| Participants                 | 6       | (a) Give the eligibility criteria, and the sources and methods of selection of participants                                                                                                                  | 4       |
| Variables                    | 7       | Clearly define all outcomes, exposures, predictors, potential confounders, and effect modifiers. Give diagnostic criteria, if applicable                                                                     | 4-5     |
| Data sources/<br>measurement | 8*      | For each variable of interest, give sources of data and details of methods of assessment (measurement). Describe comparability of assessment methods if there is more than one group                         | 4-5     |
| Bias                         | 9       | Describe any efforts to address potential sources of bias                                                                                                                                                    | 5       |
| Study size                   | 10      | Explain how the study size was arrived at                                                                                                                                                                    |         |
| Quantitative variables       | 11      | Explain how quantitative variables were handled in the analyses. If applicable, describe which groupings were chosen and why                                                                                 | 5       |
| Statistical methods          | 12      | (a) Describe all statistical methods, including those used to control for confounding                                                                                                                        | 5       |
|                              |         | (b) Describe any methods used to examine subgroups and interactions                                                                                                                                          | 5       |
|                              |         | (c) Explain how missing data were addressed                                                                                                                                                                  | 5       |
|                              |         | (d) If applicable, describe analytical methods taking account of sampling strategy                                                                                                                           | 5       |
|                              |         | (e) Describe any sensitivity analyses                                                                                                                                                                        | 5       |
| <b>Results</b>               |         |                                                                                                                                                                                                              |         |
| Participants                 | 13*     | (a) Report numbers of individuals at each stage of study—eg numbers potentially eligible, examined for eligibility, confirmed eligible, included in the study, completing follow-up, and analysed            | 6       |
|                              |         | (b) Give reasons for non-participation at each stage                                                                                                                                                         | 6       |
|                              |         | (c) Consider use of a flow diagram                                                                                                                                                                           | NA      |
| Descriptive data             | 14*     | (a) Give characteristics of study participants (eg demographic, clinical, social) and information on exposures and potential confounders                                                                     | 6       |
|                              |         | (b) Indicate number of participants with missing data for each variable of interest                                                                                                                          | Tables  |
| Outcome data                 | 15*     | Report numbers of outcome events or summary measures                                                                                                                                                         | 6-7     |
| Main results                 | 16      | (a) Give unadjusted estimates and, if applicable, confounder-adjusted estimates and their precision (eg, 95% confidence interval). Make clear which confounders were adjusted for and why they were included | 6-7     |

|                          |    |                                                                                                                                                                            |       |
|--------------------------|----|----------------------------------------------------------------------------------------------------------------------------------------------------------------------------|-------|
|                          |    | (b) Report category boundaries when continuous variables were categorized                                                                                                  |       |
|                          |    | (c) If relevant, consider translating estimates of relative risk into absolute risk for a meaningful time period                                                           |       |
| Other analyses           | 17 | Report other analyses done—eg analyses of subgroups and interactions, and sensitivity analyses                                                                             | 6-7   |
| <b>Discussion</b>        |    |                                                                                                                                                                            |       |
| Key results              | 18 | Summarise key results with reference to study objectives                                                                                                                   | 8     |
| Limitations              | 19 | Discuss limitations of the study, taking into account sources of potential bias or imprecision. Discuss both direction and magnitude of any potential bias                 | 10-11 |
| Interpretation           | 20 | Give a cautious overall interpretation of results considering objectives, limitations, multiplicity of analyses, results from similar studies, and other relevant evidence | 8-11  |
| Generalisability         | 21 | Discuss the generalisability (external validity) of the study results                                                                                                      | 8-11  |
| <b>Other information</b> |    |                                                                                                                                                                            |       |
| Funding                  | 22 | Give the source of funding and the role of the funders for the present study and, if applicable, for the original study on which the present article is based              | NA    |

\*Give information separately for exposed and unexposed groups.

**Note:** An Explanation and Elaboration article discusses each checklist item and gives methodological background and published examples of transparent reporting. The STROBE checklist is best used in conjunction with this article (freely available on the Web sites of PLoS Medicine at <http://www.plosmedicine.org/>, Annals of Internal Medicine at <http://www.annals.org/>, and Epidemiology at <http://www.epidem.com/>). Information on the STROBE Initiative is available at [www.strobe-statement.org](http://www.strobe-statement.org).

# BMJ Open

**International cross-sectional study examining the psychological and financial impact of travel restrictions on citizens and permanent residents stranded abroad during the COVID-19 pandemic**

|                                 |                                                                                                                                                                                                                                                                                                                                                                                                                            |
|---------------------------------|----------------------------------------------------------------------------------------------------------------------------------------------------------------------------------------------------------------------------------------------------------------------------------------------------------------------------------------------------------------------------------------------------------------------------|
| Journal:                        | <i>BMJ Open</i>                                                                                                                                                                                                                                                                                                                                                                                                            |
| Manuscript ID                   | bmjopen-2021-059922.R1                                                                                                                                                                                                                                                                                                                                                                                                     |
| Article Type:                   | Original research                                                                                                                                                                                                                                                                                                                                                                                                          |
| Date Submitted by the Author:   | 01-Mar-2022                                                                                                                                                                                                                                                                                                                                                                                                                |
| Complete List of Authors:       | McDermid, Pippa; University of New South Wales, School of Population Health<br>Craig, Adam; University of New South Wales, School of Population Health<br>Sheel, Meru; The University of Sydney, Sydney School of Public Health<br>Blazek, Katrina; University of New South Wales, School of Population Health<br>Talty, Siobhan; The Me AL/TA<br>Seale, Holly; University of New South Wales, School of Population Health |
| <b>Primary Subject Heading</b>: | Infectious diseases                                                                                                                                                                                                                                                                                                                                                                                                        |
| Secondary Subject Heading:      | Global health, Public health, Mental health                                                                                                                                                                                                                                                                                                                                                                                |
| Keywords:                       | COVID-19, Public health < INFECTIOUS DISEASES, MENTAL HEALTH, INFECTIOUS DISEASES                                                                                                                                                                                                                                                                                                                                          |
|                                 |                                                                                                                                                                                                                                                                                                                                                                                                                            |

SCHOLARONE™  
Manuscripts



I, the Submitting Author has the right to grant and does grant on behalf of all authors of the Work (as defined in the below author licence), an exclusive licence and/or a non-exclusive licence for contributions from authors who are: i) UK Crown employees; ii) where BMJ has agreed a CC-BY licence shall apply, and/or iii) in accordance with the terms applicable for US Federal Government officers or employees acting as part of their official duties; on a worldwide, perpetual, irrevocable, royalty-free basis to BMJ Publishing Group Ltd ("BMJ") its licensees and where the relevant Journal is co-owned by BMJ to the co-owners of the Journal, to publish the Work in this journal and any other BMJ products and to exploit all rights, as set out in our [licence](#).

The Submitting Author accepts and understands that any supply made under these terms is made by BMJ to the Submitting Author unless you are acting as an employee on behalf of your employer or a postgraduate student of an affiliated institution which is paying any applicable article publishing charge ("APC") for Open Access articles. Where the Submitting Author wishes to make the Work available on an Open Access basis (and intends to pay the relevant APC), the terms of reuse of such Open Access shall be governed by a Creative Commons licence – details of these licences and which [Creative Commons](#) licence will apply to this Work are set out in our licence referred to above.

Other than as permitted in any relevant BMJ Author's Self Archiving Policies, I confirm this Work has not been accepted for publication elsewhere, is not being considered for publication elsewhere and does not duplicate material already published. I confirm all authors consent to publication of this Work and authorise the granting of this licence.

1  
2  
3 **International cross-sectional study examining the psychological and financial impact of**  
4 **travel restrictions on citizens and permanent residents stranded abroad during the**  
5 **COVID-19 pandemic**  
6  
7

8  
9  
10 **Authors: Pippa McDermid<sup>1</sup>, Adam Craig<sup>1</sup>, Meru Sheel<sup>2</sup>, Katrina Blazek<sup>1</sup>, Siobhan**  
11 **Talty<sup>3</sup>, and Holly Seale<sup>1</sup>**  
12  
13

14  
15 **Authors Affiliations**  
16

- 17 1. School of Population Health, University of New South Wales, Sydney, NSW, Australia.  
18 2. Sydney School of Public Health, Faculty of Health and Medicine, the University of  
19 Sydney, Sydney, NSW, Australia.  
20 3. Freelance Monitoring, Evaluation, Accountability and Learning Technical Advisor,  
21 ME(AL). TA  
22  
23  
24  
25

26  
27 Correspondence  
28

29 Associate Professor. Holly Seale  
30 School of Population Health  
31 Level 2, Samuels Building  
32 Faculty of Medicine, UNSW Australia  
33 Sydney 2052, Australia  
34 Telephone: +61 (2) 9385 3129  
35 Email: [h.seale@unsw.edu.au](mailto:h.seale@unsw.edu.au)  
36  
37  
38  
39  
40  
41

42 Word count: 3664

43 Abstract: 295; Main body: 3563

44 Keywords: COVID-19; Pandemic; Public Health; Travel; Depression; Anxiety; Stress  
45  
46  
47  
48  
49  
50  
51  
52  
53  
54  
55  
56  
57  
58

59 **ABSTRACT**  
60

1  
2  
3 **Objectives:** This study aimed to evaluate the psychological and financial distress reported by  
4 citizens and permanent residents stranded abroad due to international travel restrictions  
5 introduced in response to the COVID-19 pandemic.  
6  
7

8 **Design:** An international cross-sectional study.  
9

10 **Setting:** A primary analysis of data collected between July and September 2021 through an  
11 online survey targeting individuals stranded abroad, and unable to return to their country of  
12 residence due to international travel restrictions.  
13  
14

15 **Respondents:** A total of 1054 individuals aged 18-84.  
16

17 **Data analysis:** Multivariable logistic regression models were used to explore the relationship  
18 between higher levels of depression, anxiety and stress and participant variables.  
19

20 **Outcome measures:** The survey answered questions regarding COVID-19 travel restriction-  
21 related impacts; personal stress, anxiety, and depression (using the validated DASS-21 tool);  
22 as well as impacts on housing and financial security and demographic data.  
23  
24

25 **Results:** A total of 75.4% of respondents reported wanting to return to the Oceania region  
26 (75.4%), with 45% stranded in Europe. 64.2% reported financial distress while stranded  
27 abroad. 64.4% ( $\bar{x}=9.43$ ,  $SD=5.81$ ) reported moderate-to- extremely severe (based on the  
28 DASS-21 classification) levels of depression, 41.7% for anxiety ( $\bar{x}=5.46$ ,  $SD=4.74$ ), and  
29 58.1% for stress ( $\bar{x}=10.64$ ,  $SD=5.26$ ). Multivariable analysis indicated that financial stress,  
30 an employment change, being <30yrs, having a high perceived risk of contracting COVID-19  
31 abroad and being stranded for >2 months, were significantly related to scores of moderate-to-  
32 extremely severe depression, anxiety, and stress.  
33  
34  
35  
36  
37  
38

39 **Conclusion:** The study is among the first to explore the psychological and financial distress-  
40 related impacts associated with being stranded abroad due to COVID-19 travel restrictions. It  
41 highlights a range of unintended consequences that arise from pandemic-related travel  
42 restriction, identifies the health and social needs for a particularly vulnerable population, and  
43 provides clues as to the types of support that may be adopted to best support them.  
44  
45  
46  
47  
48  
49  
50  
51  
52  
53  
54  
55  
56  
57

## 58 **STRENGTHS AND LIMITATIONS OF THIS STUDY**

59  
60

- This study collected novel data on the psychological and financial distress-related impacts associated with being stranded abroad due to COVID-19 travel restrictions
- Analysing results based on the DASS-21 tool revealed high prevalence of moderate-to-extremely severe depression, anxiety, and stress.
- Multivariable analyses were conducted on respondents' depression, anxiety, and stress scores to explore predictor and protective factors.
- Psychological data were collected on self-reported scales, which may lead to responder bias.
- Participant recruitment relied on convenience sampling and may not have captured travellers from all relevant countries.



## BACKGROUND

In response to the COVID-19 pandemic, most countries around the world have implemented some level of international travel restriction or complete border closures (1-3). As of February 2020, many countries had commenced repatriation of their citizens stranded abroad. By the end of 2020, some countries like Japan and Spain claimed to have completely repatriated every citizen that wanted to return. However, reports continue to suggest stranded travellers were still trying to get to their country of residence (referred to as 'home') 20 months into the COVID-19 pandemic despite many countries reopening borders (4, 5). In September 2021, every country globally has some level of travel restrictions (except those without data), with many countries still maintaining total border closures, while others had in place quarantine systems, screening measures and travel bans on high-risk regions (6). Factors impacting on a person's ability to return to their home have included countries placing limits on the number of passengers that can enter the country, caps on the hotel quarantine capacities, the cost of travel and hotel quarantine, and in some cases having restrictions on flights from certain high-risk countries. Our previous study suggested that the support available to those who were stranded abroad was limited, and in some cases difficult to access and comprehend (7). Support provided by countries has varied from repatriation flights, emergency accommodation, mental health and medical assistance, emergency call lines and financial assistance. However, of the countries that were reviewed, we were unable to identify any one country providing all the different support types listed. Public commentary through news and social media has hinted at the level of psychosocial impact on citizens stranded abroad. These articles suggest that many of these travellers: have felt abandoned by their governments, had little financial support, and for some, experienced depression and homelessness (8-10). While the findings from many COVID-19 studies have reported high levels of psychological distress in nearly all populations, the focus of these studies has been on domestic populations, like healthcare and frontline workers, students and those in lockdown and quarantine (10-19). One study, with similar aims to the present study, found 63% of Saudi citizens living abroad as students during COVID-19 experienced 'psychiatric' distress symptoms (20). Even though travel restrictions have been in place since early 2020, there is currently limited understanding of the level of psychological distress that has been experienced by those stranded abroad wanting to return. This study examined the impacts of travel restrictions on people stranded abroad, who were unable to return to their country of citizenship/residence during the COVID-19 pandemic. We aimed to 1) measure the prevalence of psychological

1  
2  
3 impact associated with being stranded overseas due to covid-related travel restrictions and 2)  
4 identify demographic and circumstantial factors associated with severe psychological impact.

## 5 6 **METHODS**

### 7 8 **Population and procedures**

9  
10 An online survey was created and administered anonymously using the *Qualtrics* (21) survey  
11 platform, with respondents recruited through a variety of social media channels. Respondents  
12 were those people who were either still stranded away from their country of residence/home  
13 or had been stranded at some point since the commencement of the COVID-19 pandemic.

14  
15 There were no limitations placed on the country of residence, nor the length of time the  
16 person had been stranded for. To meet the inclusion criteria, respondents had to self-identify  
17 as having attempted to return to their country of residence but have had their travel plans  
18 changed. The survey was open between 20 July 2021 and 24 September 2021. Respondents  
19 unique IP addresses prevented duplicate entries. Ethical approval for this study was granted  
20 by the UNSW Human Research Ethics Committee (#210418). All respondents indicated their  
21 consent to participate. This study did not receive any funding.

### 22 23 **Patient and Public Involvement**

24  
25 No patient involved

### 26 27 **Survey instruments and measures**

28  
29 Demographics: included gender, age, level of education, ethnicity, employment status,  
30 history of chronic illness, and living status. Ethnicity was classified based on the nine broad  
31 groups according to the Australian Standard Classification of Cultural and Ethnic Groups  
32 (22).

33  
34 Travel experiences: Respondents were asked where they were stranded abroad and where  
35 they intended to return to, and this data was recoded into geographic groups based on the  
36 World Health Organisation regions (23). Questions focused on their current situation  
37 (whether they had returned, were still stranded abroad awaiting return or still abroad but had  
38 decided to stay), flight cancellations/delays, length of time waiting to return and their  
39 experiences with travel.

40  
41 Mental wellbeing: The depression, anxiety, and stress scale (DASS-21) was used in this study  
42 (24). The DASS-21 is a validated self-report tool, previously used in COVID-19 research  
43 studies (14, 25), containing 21 items assessing scores of depression, anxiety, and stress  
44 symptoms (7 items each). Respondents were asked to reflect on when they were stranded  
45 abroad (for respondents who had already returned) or reflecting on the last two weeks and  
46 rate each statement on a 4-point Likert scale from 0 (unsure/do not recall; did not apply to me  
47  
48  
49  
50  
51  
52  
53  
54  
55  
56  
57  
58  
59  
60

1  
2  
3 at all) to 3 (applied to me very much, or most of the time). Scores in each sub section are then  
4 multiplied by 2 to give a final score categorising the depression, anxiety, and stress into  
5 normal (Depression: 0-9; Anxiety: 0-7; Stress: 0-14), mild (Depression: 10-13; Anxiety: 8-9;  
6 Stress: 15-18), moderate (Depression: 14-20; Anxiety: 10-14; Stress: 19-25), severe  
7 (Depression: 21-27; Anxiety: 15-19; Stress: 26-33), or extremely severe (Depression: 28+;  
8 Anxiety: 20+; Stress: 34+). Higher scores reflect increased emotional and psychological  
9 distress.

10  
11 As we suspected some potential respondents having returned home already and could be  
12 potentially reflecting further than 2 weeks, we included an additional option of “unsure/do  
13 not recall”, with any respondent who selects this option to be removed for DASS21 analysis,  
14 which would allow for removal of recall bias during the analyses phase. Respondents were  
15 asked whether they had access to crisis support or mental health services while abroad and if  
16 ‘yes’, whether they had used this service or support. Finally, respondents reported their  
17 perceived risk of contracting COVID-19 both in the country where they are/were stranded  
18 and the country where they had or were waiting to return to (Scale of 1-10; 1 being no risk  
19 and 10 being high risk).

20  
21 Financial wellbeing: Respondents were initially asked whether they felt financial stress while  
22 stranded abroad (yes/no), then if ‘yes’ were asked how they addressed the financial stress  
23 (receiving financial support from family, government loans, bank credit, or social services).  
24 Questions on employment situation and changes while abroad were asked along with a  
25 question on whether the participant experienced homelessness while abroad. Homelessness  
26 was defined as a period where respondents did not have somewhere to stay/live.

### 27 28 29 30 31 32 33 34 35 36 37 38 39 40 41 **Statistical analyses**

42  
43 We aimed to collect responses from a minimum of 1,200 people to allow analysis with a  
44 margin of error of approximately 3.2%. Descriptive analysis involved the calculation of  
45 means, standard deviation, confidence interval and standard errors. Chi-square test of  
46 independence were first used to compare categorical variables. Independent variables that  
47 showed a significant association with DASS severity scores at a  $p < .2$  level was included in  
48 the model as predictor variables. The DASS scores were dichotomised to reflect either  
49 no/mild symptom severity or moderate to extremely severe. Multivariable logistic regression  
50 was then performed to analyse the effect of age, perceived risk of contracting COVID-19  
51 while stranded, financial stress, time stranded, employment change and homelessness on  
52 predicting moderate to extremely DASS. No multicollinearity amongst variables was  
53  
54  
55  
56  
57  
58  
59  
60

1  
2  
3 identified. P values of  $<.05$  was considered statistically significant. All data analyses were  
4 conducted using SPSS (26).

## 6 **RESULTS**

### 8 **Respondent characteristics**

9  
10 A total of 1054 respondents completed the full survey, while a further 296 completed over  
11 50% of the questions and were included in the descriptive analysis but excluded from  
12 regression analysis. See Figure 1 for a full breakdown on inclusions. Demographic  
13 information is provided in Table 1. The mean age was  $41.09 \pm 13.08$ , with 69.5% (733/1054)  
14 being female, 43.8% (462/1054) of north-west European ethnicity, while most had a tertiary  
15 education (90.7%, 956/1054) and were stranded in the European Region (EUR) (45.3%,  
16 608/1341) and were trying to return to the Western Pacific Region (WPR) (75.4%,  
17 1011/1341).

18  
19 Approximately 25% (303/1214) reported a historical or current COVID-19 infection, and of  
20 those the majority rated a 'mild' symptom severity (85.1%, 258/303). Respondents' mean  
21 overall level of perceived risk of contracting COVID-19 while abroad (on a scale of 1 to 10,  
22 where 1 = no risk, and 10=high risk) was 6.64 ( $n=1182$ ,  $SD=2.85$ ), with 24.7% (300/1214)  
23 rating the perceived risk while abroad at high risk (10). Comparatively, the overall mean  
24 level of perceived risk of contracting COVID-19 in the country where respondents had  
25 returned to was 4.11 ( $n=673$ ,  $SD=2.81$ ), with only 11.9% (54/673) rating the perceived risk at  
26 'home' as high risk.

### 27 **Travel experiences**

28  
29 Initially 44% (550/1245) of respondents had left their country of residence to take up long-  
30 term employment, with over 60% stranded abroad for more than 5 months (63.6%,  
31 854/1341), with 26.6% (357/1245) either having had booked a flight or awaiting flight  
32 availability. Refer to table 2 for a full breakdown of respondents experiences and current  
33 situation while stranded abroad.

### 34 **Mental wellbeing**

35  
36 Figure 2 presents the respondents ( $n=1133$ ) self-reported depression, anxiety, stress symptom  
37 severity score categories based on the DASS-21 tool. Of the respondents, 64.4% scored  
38 moderate to extremely severe depression symptoms ( $\bar{x}=18.87$ ,  $SD=11.62$ ), 41.7% scoring  
39 moderate to extremely severe anxiety symptoms ( $\bar{x}=10.91$ ,  $SD=9.47$ ), and 58.1% scoring  
40 between moderate to extremely severe stress symptoms ( $\bar{x}=21.48$ ,  $SD=10.52$ ).

41  
42 Many reported no access to crisis support or mental health services while abroad (63.5%,  
43 719/1133), and of those that did have access, only 37.9% (157/414) utilised the services. A  
44  
45  
46  
47  
48  
49  
50  
51  
52  
53  
54  
55  
56  
57  
58  
59  
60

total of 12% (133/1112) experienced a period of homelessness while stranded abroad. Of those that were willing to share their experiences ( $n = 94/133$ ), commonly noted situations included living in temporary accommodation (32%, 30/94), sleeping on the couch or in a spare bedroom at a friend/family members place (32%, 30/94), and staying in emergency accommodation (including homeless shelters) (17%, 16/94). Less common experiences were those that lived on the street, trains, at the airport, in cars, in tents (<20%, 18/94). Two respondents disclosed having experienced a sexual assault while staying at a homeless shelter.

### **Financial wellbeing**

Financial distress was reported in 64.2% (723/1127), and 45% (433/1127) reported a change in employment. A breakdown of ways in which respondents sought to address financial distress along with employment changes and current employment situation are reported in Table 3.

### **Factors associated with and predictors of depression, anxiety, and stress**

Chi square analyses revealed significant associations between respondents DASS categories and their age, time stranded abroad, financial stress, homelessness, employment change, and their perceived risk of contracting COVID-19 (on a scale from 1 to 10, with 1-3 being considered low risk, 4-6 moderate risk and 7-10 high risk). No associations were found between DASS severity categories and having access to crisis support or mental health services (see Supplementary file 1). For depression, logistic regression identified financial stress, employment change, and a high perceived risk of contracting COVID-19 as predictors of moderate to extremely severe depression. Overall, the model correctly discriminated 67.7% of cases and Nagelkerke  $R^2$  indicated a 14% variation of depression explained by the model. For anxiety, logistic regression identified financial stress, employment change, and a high perceived risk of contracting COVID-19, as predictors of moderate to extremely severe anxiety. Overall, the model correctly discriminated 64.5% of cases and Nagelkerke  $R^2$  indicated a 13% variation of anxiety explained by the model. Finally for stress, logistic regression identified financial stress, employment change, and a high perceived risk of contracting COVID-19, as predictors of moderate to extremely severe stress. Overall, the model showed goodness of fit to the data ( $\chi^2(14) = 95.772, p < .001$ ), correctly discriminated 63.6% of cases and Nagelkerke  $R^2$  indicated a 13% variation of stress explained by the model. Table 4 presents results of the multivariable logistic regression. Being 30 years or older and stranded for 2 months or less was associated with decreased odds of moderate to extremely severe depression, anxiety, and stress.

## DISCUSSION

This study evaluated the psychological and financial distress of individuals stranded abroad during the COVID-19 pandemic and highlights the importance of providing additional support to this vulnerable group in future public health events. Amongst our respondents we found that over half had been stranded for longer than five months, with the majority having more than one flight cancellation or change. Our results confirm sentiments shared on social media by people stranded abroad, that reflect experiences of having no financial support, depression, homelessness and a general feeling of abandonment by their governments (8-10). Given the continued flight changes and delays (incurring additional costs) in the population of individuals stranded abroad, along with changes to employment, it is perhaps not surprising that we documented a high level of financial distress (64.2%), employment changes (45%), and experiences of homelessness (12%). Our findings align with results from non-travel related COVID studies which have indicated an increase in financial distress (17), increases in experiences of homelessness (27) and growing employment changes (28) during the pandemic. Comparatively, we reported much higher findings compared to a survey of the general population conducted within the first 6 months of the pandemic, finding that 30% of Australians were financially stressed because of the pandemic (29). This difference could be explained by those stranded abroad having different elements of uncertainty (additional flight costs, additional rent, and expenses due to the length of time stranded, and uncertain employment) compared to the general population.

Based on our findings, we recommend policymakers prioritise increasing the availability of financial assistance in the form of government grants or loans for living and flight costs incurred due to being stranded abroad, or alternatively providing the option to access social support while abroad if an individual would have been eligible had they not been abroad. Furthermore, considering the proportion of people who reported experiencing homelessness, the cases of sexual assault within homeless shelters, and previous research indicating a lack of emergency accommodation options for citizens abroad during COVID-19 (7), it is recommended that policymakers provide a solution to this issue. Whether it be through financial assistance or an emergency accommodation program similar to those that the French and Spanish governments introduced, where citizens residing permanently abroad have the option of offering accommodation or a room to citizens who are stranded, governments have to prioritise a solution and effectively communicate this support package (7).

1  
2  
3 At this stage in the pandemic, it is almost indisputable that COVID-19 has had a  
4 psychological impact on populations around the world, whether it be healthcare workers,  
5 people in lockdown or quarantine, or specific countries or communities, the stressors were all  
6 encompassing (11-14, 30, 31). Our findings reflect much higher incidence of moderate to  
7 extremely severe depression (64.4%), anxiety (41.7%), and stress (58.1%), compared to  
8 domestic populations around the world (25). Previous research show lower DAS severity  
9 scores (25), especially when comparing our results to studies exploring psychological  
10 impacts of COVID-19 on healthcare workers (32, 33) and domestic students (34, 35). One  
11 study observing the psychological correlates of COVID-19 on the general population in  
12 Austria, reported drastically lower scores of depression (21.6%), anxiety (28.6%) and stress  
13 (28%), and found that 'frequent contact with family or friends' was shown to be a protective  
14 factor (25).

15  
16 However, research on international students during COVID-19, have reflected high DASS  
17 severity, aligned with our study findings (20, 36). Possible reasons for these differences could  
18 be the parallels between international student experiences and those stranded, both living  
19 abroad and arguably away from their immediate social support network (family). A range of  
20 factors contributed to the psychological wellbeing of individuals in this study. Having  
21 financial stress, an employment change and having a high perceived risk of contracting  
22 COVID-19 were all associated with predicting moderate to extremely severe depression,  
23 anxiety, and stress. Additionally, the length of time stranded was also associated with higher  
24 severity of DASS, with >5months for depression and stress, and 3-5months for anxiety.  
25 These results are not surprising considering the literature shows that many stressors, like  
26 financial distress, fear of COVID-19 infection, loneliness, inadequate information, and  
27 employment issues have all presented as predictors of poor mental health and in the case of  
28 financial distress, can go further than predicting depression to suicidal thoughts and  
29 behaviours (31, 37). Unique to this study, however, is the finding that the longer an  
30 individual is stranded abroad the more likely they are to present with moderate to severe DAS  
31 symptoms.

32  
33 Interestingly, of the age categories in this investigation, respondents >69yrs had lower scores  
34 of depression, anxiety, and stress, inconsistent with research conducted in Spain and Canada  
35 suggesting increased DASS scores in elders (38, 39). This, as was noted by the authors of the  
36 Sightlines Project (40), may be due to older people being more financial secure than other  
37 age groups. It may also reflect that older people were less likely to have insecurity associated  
38 with employment or have younger dependent family members to provide direct care to. This  
39  
40  
41  
42  
43  
44  
45  
46  
47  
48  
49  
50  
51  
52  
53  
54  
55  
56  
57  
58  
59  
60

1  
2  
3 may have provided more opportunity for flexibility in their travel plans. These results  
4 reflecting high severity of DASS in those stranded abroad, provides both current and future  
5 direction for policymakers. We recommend policymakers provide adequate mental health  
6 interventions be available to those stranded abroad, either online or face-to-face where  
7 possible through a local consulate.  
8  
9

10  
11 It is hard to deny that people have been deprived of the ability to return to their country of  
12 citizenship or permanent residence, as shown by the 63.3% of our respondents being stranded  
13 abroad for longer than 5 months. Addressing public health threats from a health security  
14 perspective has already increased fears that it legitimises government actions, potentially  
15 undermining personal sovereignty, and impeding human rights (41). A commonly cited  
16 human rights treaty in response to imposed restrictions is Article 12 (42) of the International  
17 Covenant on Civil and Political Rights (ICCPR), a treaty with 74 signatories and 173 parties  
18 which states that “No one shall be arbitrarily deprived of the right to enter his own country”  
19 (42).  
20  
21

22  
23 The most frequently mentioned human rights breach was the Australian government  
24 imposing not only a complete ban on incoming flights from India, but potential criminal  
25 penalties to Australian citizens or permanent residents of up to five years imprisonment,  
26 and/or fines up to \$66000 (AUD), for attempting to enter Australia from India through a third  
27 country (43). Mostly in reference to breaching Article 12 (42) of the International Covenant  
28 on Civil and Political Rights (ICCPR), this ban, implemented under the *Biosecurity Act*  
29 *2015(44)*, between April and May 2021, has been labelled a ‘racist rights breach’ (45), with  
30 the Australian Human Rights Commission approaching the federal government directly with  
31 their concerns (43). Due to impacts of ongoing border closures and individuals struggling to  
32 return home, as further highlighted in this study where the majority of respondents were  
33 trying to return to, Australian citizens stranded abroad submitted a human rights complaint to  
34 the United Nations Human Rights Committee under the ICCPR, with the UN Human Rights  
35 Committee already successfully requesting to the Australian Government the prompt  
36 repatriation of two Australians in April 2021 (46).  
37  
38

39  
40 Due to the results of our study alongside the probable human rights breaches, we recommend  
41 policymakers seriously reconsider current and future restriction of movement of citizens and  
42 permanent residents returning home who are at risk of financial distress and severe DASS the  
43 longer that they are stranded for. With international borders reopening around the world,  
44 some being restricted for nearly 20 months, it is critical to not only look at the impact of  
45 travel restrictions from the perspective of reducing infectious disease importations, but also  
46  
47  
48  
49  
50  
51  
52  
53  
54  
55  
56  
57  
58  
59  
60



1  
2  
3 from the perspective of those stranded abroad, who were arguably one of the most impacted  
4 by them. In doing so, policymakers can determine where further support is needed in future  
5 emergency situations resulting in people stranded abroad.  
6  
7

### 8 **Limitations**

9  
10 This work is not without limitations. Firstly, like other cross sectional survey studies, it lacks  
11 a longitudinal follow up on respondents. Secondly, the self-report questionnaire for  
12 psychological symptoms raises possible selection bias and subjectivity, however our sample  
13 size being large, and the addition of an optional 'do not recall' response should mitigate  
14 certain bias. Thirdly, we were unable to capture the specific immigration status of those  
15 returning, i.e., whether they were citizens, permanent residents, or short-term visa holders.  
16 Finally, we did not examine pre-existing mental health conditions which could prove to be a  
17 confounding factor, and there was an over representation of women, those returning to the  
18 western pacific region and respondents with an academic background, possible due to  
19 convenience sampling issues and survey distribution originating in Australia, which may not  
20 fully represent the population of people who were stranded abroad. The study did not collect  
21 information on treatment of anxiety, stress, or depression, nor did we collect data on suicide  
22 ideation. Notwithstanding the previously mentioned limitations, findings from this study  
23 provide insights not previously reported into the psychological and financial impacts and  
24 support needed for individuals stranded abroad due to COVID-19 travel restrictions. These  
25 insights will be valuable for policy makers as they design and deliver support programs in  
26 response and prepare for future events.  
27  
28  
29  
30  
31  
32  
33  
34  
35  
36  
37  
38

### 39 **Conclusion**

40  
41 This research suggests that being stranded abroad during COVID-19 may lead to not only an  
42 increase in financial stress, but quite severe depression, anxiety, and stress. Our findings  
43 show that being young, stranded abroad for longer, having a high perception of infection risk,  
44 experiencing employment changes and financial stress are all associated with increased  
45 severity of depression, anxiety, and stress. Respondents reported that lack of mental and  
46 social health support while stranded. This indicates that there are gaps in services available  
47 for this vulnerable population or lack of communication as to how to access them; both issues  
48 that need to be resolved.  
49  
50  
51  
52  
53  
54  
55  
56  
57  
58  
59  
60

## ABBREVIATIONS

**AFR:** African region

**AMR:** Region of the Americas

**COVID-19:** Coronavirus disease of 2019

**DAS:** Depression, anxiety, and stress

**DASS-21:** The 21-item depression, anxiety, and stress scale

**EMR:** Eastern Mediterranean region

**EUR:** European region

**SEAR:** South-East Asian region

**WPR:** Western Pacific region

**REFERENCES**

1. Chinazzi M, Davis JT, Ajelli M, Gioannini C, Litvinova M, Merler S, et al. The effect of travel restrictions on the spread of the 2019 novel coronavirus (COVID-19) outbreak. *Science*. 2020;368(6489):395-400.
2. Seyfi S, Hall CM, Shabani B. COVID-19 and international travel restrictions: the geopolitics of health and tourism. *Tourism Geographies*. 2020:1-17.
3. von Tigerstrom BJ, Halabi SF, Wilson KR. The International Health Regulations (2005) and the re-establishment of international travel amidst the COVID-19 pandemic. *Journal of Travel Medicine*. 2020;27(8).
4. Ministry of Foreign Affairs to complete repatriation of Spaniards on close to 50 flights: Ministerio de Asuntos Exteriores; 2020 [Available from: [http://www.exteriores.gob.es/Portal/en/SalaDePrensa/NotasdePrensa/Paginas/2020\\_NOTAS\\_P/20200430\\_NOTA065.aspx](http://www.exteriores.gob.es/Portal/en/SalaDePrensa/NotasdePrensa/Paginas/2020_NOTAS_P/20200430_NOTA065.aspx)].
5. Keynote Speech by Foreign Minister MOTEGI at the 2ND TOKYO GLOBAL DIALOGUE “Japan’s Foreign Policy towards the post-COVID-19 world”: Ministry of Foreign Affairs of Japan; 2021 [Available from: [https://www.mofa.go.jp/fp/pp/page3e\\_001109.html](https://www.mofa.go.jp/fp/pp/page3e_001109.html)].
6. Hale T, Angrist N, Goldszmidt R, Kira B, Petherick A, Phillips T, et al. A global panel database of pandemic policies (Oxford COVID-19 Government Response Tracker). *Nature Human Behaviour*. 2021;5(4):529-38.
7. McDermid P, Craig A, Sheel M, Seale H. How have governments supported citizens stranded abroad due to COVID-19 travel restrictions? A comparative analysis of the financial and health support in eleven countries. *BMC Infectious Diseases*. 2022;22(1):161.
8. Devlin M. "It was the worst possible situation": Canadians stuck abroad months into pandemic. *DH News*. 2020.
9. Fuller K. Australians stranded overseas 'betrayed', says a man telling of months of injury, illness and homelessness. *ABC Illawarra*. 2020.
10. Capper S. Abandoned overseas: The mental health toll of Australia's closed borders on its citizens. *SBS News*. 2021.
11. Burke T, Berry A, Taylor LK, Stafford O, Murphy E, Shevlin M, et al. Increased Psychological Distress during COVID-19 and Quarantine in Ireland: A National Survey. *J Clin Med*. 2020;9(11):3481.
12. Dawel A, Shou Y, Smithson M, Cherbuin N, Banfield M, Calear AL, et al. The Effect of COVID-19 on Mental Health and Wellbeing in a Representative Sample of Australian Adults. *Frontiers in Psychiatry*. 2020;11(1026).
13. Kalok A, Sharip S, Abdul Hafizz AM, Zainuddin ZM, Shafiee MN. The Psychological Impact of Movement Restriction during the COVID-19 Outbreak on Clinical Undergraduates: A Cross-Sectional Study. *Int J Environ Res Public Health*. 2020;17(22).
14. Newby JM, O’Moore K, Tang S, Christensen H, Faasse K. Acute mental health responses during the COVID-19 pandemic in Australia. *PLOS ONE*. 2020;15(7):e0236562.
15. O’Sullivan D, Rahamathulla M, Pawar M. The Impact and Implications of COVID-19: An Australian Perspective. *The International Journal of Community and Social Development*. 2020;2(2):134-51.
16. Rajkumar RP. COVID-19 and mental health: A review of the existing literature. *Asian J Psychiatr*. 2020;52:102066-.
17. Robillard R, Saad M, Edwards J, Solomonova E, Pennestri M-H, Daros A, et al. Social, financial and psychological stress during an emerging pandemic: observations from a population survey in the acute phase of COVID-19. *BMJ Open*. 2020;10(12):e043805.

18. Sher L. The impact of the COVID-19 pandemic on suicide rates. *Qjm.* 2020;113(10):707-12.
19. Stevenson C, Wakefield JRH. Financial distress and suicidal behaviour during COVID-19: Family identification attenuates the negative relationship between COVID-related financial distress and mental ill-health. *Journal of Health Psychology.*0(0):13591053211014597.
20. Behisi MA, Altaweel HM, Gassas RF, Aldehaiman M, Alkhamees AA. COVID-19 Pandemic and Mental Health Status of Saudi Citizens Living Abroad. *International journal of environmental research and public health.* 2021;18(15).
21. Qualtrics. Qualtrics. Provo, Utah, USA2005.
22. Australian Standard Classification of Cultural and Ethnic Groups (ASCCEG) (2016).
23. Alderslade R, Bellman M, Rawson N, al. e. The national childhood encephalopathy study: a report on 1000 cases of serious neurologic disorders in infants and young children from the NCES research team. In: Whooping cough: reports from the Committee on the Safety of Medicines and the Joint Committee on Vaccination and Immunisation. Department of Health & Social Security, HMSO; 1981 1981. Report No.: 1-184.
24. Lovibond PF, Lovibond SH. Manual for the Depression Anxiety Stress Scales. Sydney: Psychology Foundation. 1995(2nd. Ed.).
25. Traunmüller C, Stefitz R, Gaisbachgrabner K, Schwerdtfeger A. Psychological correlates of COVID-19 pandemic in the Austrian population. *BMC Public Health.* 2020;20(1):1395.
26. IBM SPSS Statistics for Mac. 28 ed. Armonk, NY: IBM Corp.; 2021.
27. Kunz. RSaM. COVID-19 IMPACTS US ALL: Ensuring the safety and well-being of people on temporary visas during COVID-19.; 2020.
28. Tušl M, Brauchli R, Kerksieck P, Bauer GF. Impact of the COVID-19 crisis on work and private life, mental well-being and self-rated health in German and Swiss employees: a cross-sectional online survey. *BMC Public Health.* 2021;21(1):741.
29. Taking the pulse of the nation: Melbourne Institute's Survey of the Impact of COVID-19 in Australia. The University of Melbourne; 2020.
30. Xiong J, Lipsitz O, Nasri F, Lui LMW, Gill H, Phan L, et al. Impact of COVID-19 pandemic on mental health in the general population: A systematic review. *J Affect Disord.* 2020;277:55-64.
31. Stevenson C, Wakefield JRH. Financial distress and suicidal behaviour during COVID-19: Family identification attenuates the negative relationship between COVID-related financial distress and mental ill-health. *Journal of Health Psychology.* 2021;26(14):2665-75.
32. Hammond NE, Crowe L, Abbenbroek B, Elliott R, Tian DH, Donaldson LH, et al. Impact of the coronavirus disease 2019 pandemic on critical care healthcare workers' depression, anxiety, and stress levels. *Aust Crit Care.* 2021;34(2):146-54.
33. Lenzo V, Quattropiani MC, Sardella A, Martino G, Bonanno GA. Depression, Anxiety, and Stress Among Healthcare Workers During the COVID-19 Outbreak and Relationships With Expressive Flexibility and Context Sensitivity. *Frontiers in Psychology.* 2021;12(348).
34. Juchnowicz D, Baj J, Forma A, Karakuła K, Sitarz E, Bogucki J, et al. The Outbreak of SARS-CoV-2 Pandemic and the Well-Being of Polish Students: The Risk Factors of the Emotional Distress during COVID-19 Lockdown. *J Clin Med.* 2021;10(5):944.
35. Vala NH, Vachhani MV, Sorani AM. Study of anxiety, stress, and depression level among medical students during COVID-19 pandemic phase in Jamnagar city. *National Journal of Physiology, Pharmacy and Pharmacology.* 2020;10(12):1043-5.

- 1  
2  
3 36. Alam MD, Lu J, Ni L, Hu S, Xu Y. Psychological Outcomes and Associated Factors  
4 Among the International Students Living in China During the COVID-19 Pandemic.  
5 *Frontiers in Psychiatry*. 2021;12(1372).  
6  
7 37. Serafini G, Parmigiani B, Amerio A, Aguglia A, Sher L, Amore M. The  
8 psychological impact of COVID-19 on the mental health in the general population. *QJM: An*  
9 *International Journal of Medicine*. 2020;113(8):531-7.  
10  
11 38. Ozamiz-Etxebarria N, Dosil-Santamaria M, Picaza-Gorrochategui M, Idoiaga-  
12 Mondragon N. Stress, anxiety, and depression levels in the initial stage of the COVID-19  
13 outbreak in a population sample in the northern Spain. *Cad Saude Publica*.  
14 2020;36(4):e00054020.  
15  
16 39. Nwachukwu I, Nkire N, Shalaby R, Hrabok M, Vuong W, Gusnowski A, et al.  
17 COVID-19 Pandemic: Age-Related Differences in Measures of Stress, Anxiety and  
18 Depression in Canada. *Int J Environ Res Public Health*. 2020;17(17).  
19  
20 40. The Sightlines Project: seeing our way to living long & living well in 21st century  
21 America: Stanford Center on Longevity; 2016 [Available from:  
22 [https://www.soa.org/globalassets/assets/files/research/projects/research-2016-sightlines-](https://www.soa.org/globalassets/assets/files/research/projects/research-2016-sightlines-report.pdf)  
23 [report.pdf](https://www.soa.org/globalassets/assets/files/research/projects/research-2016-sightlines-report.pdf).  
24  
25 41. Harrington J. Indicators, security and sovereignty during COVID-19 in the Global  
26 South. *International Journal of Law in Context*. 2021;17(2):249-60.  
27  
28 42. International Covenant on Civil and Political Rights (16 December 1966).  
29  
30 43. Statement on travel ban and sanctions on Australians travelling from India. Australian  
31 Human Rights Commission. 2021.  
32  
33 44. Biosecurity Act Sect. 477 (2015).  
34  
35 45. Australia's India ban criticised as 'racist' rights breach. *BBC News*. 2021.  
36  
37 46. Hicks E. A Right to Come Home? Repatriation Rights & Policy in Australia.  
38 Melbourne: The Univeristy of Melbourne; 2021.  
39  
40  
41  
42  
43  
44  
45  
46  
47  
48  
49  
50  
51  
52  
53  
54  
55  
56  
57  
58  
59  
60

## DECLARATIONS

### Ethics approval and consent to participate

Ethical approval for this study was granted by the UNSW Human Research Ethics Committee (#210418). All respondents were anonymous and indicated their consent to participate.

### Competing interests

The authors declare that they have no competing interests.

### Contribution statement

PM conducted data collection, data analysis, manuscript writing and contributed to study design. AC, MS and HS conceived study design, interpretation of the data and were involved with manuscript writing and had final oversight. KB supported the statistical analysis of the data and ST supported the interpretation and write up of the findings. All authors read and approved the final manuscript.

### Funding

Not applicable

### Data sharing

The data used in this study is available upon request from the authors.

### Supplementary information

Supplementary file 1: Associations between participant factors and levels of depression, anxiety, and stress

### Figure Legend

Figure 1. Flowchart of participant inclusion

Figure 2. Depression, anxiety, and stress categories of citizens stranded abroad during COVID-19 (% of sample)

**Table 1. Characteristics of respondents stranded during COVID-19**

| <b>Variables</b>                            | <b><i>n</i></b> | <b>%</b> |
|---------------------------------------------|-----------------|----------|
| <b>Sex recorded at birth</b>                | <b>(1054)</b>   |          |
| Female                                      | 733             | 69.5     |
| Male                                        | 308             | 29.2     |
| Another term                                | 2               | .2       |
| Prefer not to say                           | 11              | .8       |
| <b>Gender</b>                               | <b>(1054)</b>   |          |
| Female                                      | 732             | 69.4     |
| Male                                        | 304             | 28.8     |
| Another term                                | 5               | .5       |
| Prefer not to say                           | 13              | 1.2      |
| <b>Age</b>                                  | <b>(1054)</b>   |          |
| 18-29                                       | 226             | 21.4     |
| 30-49                                       | 545             | 51.7     |
| 50-69                                       | 262             | 24.9     |
| 70+                                         | 21              | 1.1      |
| <b>Main language spoken at home</b>         | <b>(1054)</b>   |          |
| English                                     | 940             | 89.2     |
| Other                                       | 83              | 7.9      |
| Spanish                                     | 11              | 1.0      |
| Urdu                                        | 7               | .7       |
| French                                      | 7               | .7       |
| Chinese                                     | 6               | .6       |
| <b>Highest level of education</b>           | <b>(1054)</b>   |          |
| Tertiary education                          | 956             | 90.7     |
| Secondary education                         | 91              | 8.6      |
| Primary education                           | 5               | .5       |
| No formal education                         | 2               | .2       |
| <b>Current employment situation</b>         | <b>(1250)</b>   |          |
| Working now for pay                         | 620             | 56.0     |
| Unemployed                                  | 240             | 21.7     |
| Other                                       | 95              | 8.6      |
| Student                                     | 88              | 7.9      |
| Live with parents/guardians                 | 86              | 8.0      |
| Stay at home parent/caregiver               | 84              | 7.6      |
| Retired                                     | 82              | 7.4      |
| Volunteer                                   | 23              | 2.1      |
| Unable to work due to disability or illness | 18              | 1.6      |
| <b>Ethnicity</b>                            | <b>(1054)</b>   |          |
| North-West European                         | 462             | 43.8     |
| Oceanian                                    | 242             | 23       |
| Unsure                                      | 134             | 12.7     |

1  
2  
3  
4  
5  
6  
7  
8  
9  
10  
11  
12  
13  
14  
15  
16  
17  
18  
19  
20  
21  
22  
23  
24  
25  
26  
27  
28  
29  
30  
31  
32  
33  
34  
35  
36  
37  
38  
39  
40  
41  
42  
43  
44  
45  
46  
47  
48  
49  
50  
51  
52  
53  
54  
55  
56  
57  
58  
59  
60

|                                                        |               |      |
|--------------------------------------------------------|---------------|------|
| South-East Asian                                       | 70            | 6.6  |
| Southern and Eastern European                          | 68            | 6.5  |
| Southern and Central Asian                             | 27            | 2.6  |
| People of the Americas                                 | 26            | 2.5  |
| North-East Asian                                       | 11            | 1.0  |
| North African and Middle Eastern                       | 10            | .9   |
| Sub-Saharan African                                    | 4             | .4   |
| <b>Usual country of residence</b>                      | <b>(1341)</b> |      |
| WPR                                                    | 1011          | 75.4 |
| EUR                                                    | 176           | 13.1 |
| AMR                                                    | 93            | 6.9  |
| SEAR                                                   | 29            | 2.2  |
| EMR                                                    | 25            | 1.9  |
| AFR                                                    | 7             | .5   |
| <b>Country where stranded</b>                          | <b>(1341)</b> |      |
| EUR                                                    | 608           | 45.3 |
| WPR                                                    | 311           | 23.2 |
| AMR                                                    | 238           | 17.7 |
| EMR                                                    | 79            | 5.9  |
| SEAR                                                   | 78            | 5.8  |
| AFR                                                    | 27            | 2.0  |
| <b>Initial reason for leaving country of residence</b> | <b>(1245)</b> |      |
| Long-term employment                                   | 550           | 44.2 |
| Other                                                  | 272           | 21.8 |
| Visiting family or friends                             | 260           | 20.9 |
| Travel to study overseas                               | 72            | 5.8  |
| Travel for business                                    | 54            | 4.3  |
| Tourism                                                | 37            | 3.0  |

**AFR, African Region; AMR, Region of the Americas; SEAR, South-East Asian Region; EUR, European Region; EMR, Eastern Mediterranean Region; WPR, Western Pacific Region**



**Table 2. Travel experiences of respondents stranded abroad during COVID-19**

| <b>Variables</b>                                              | <b><i>n</i></b> | <b>%</b> |
|---------------------------------------------------------------|-----------------|----------|
| <b>Time stranded abroad</b>                                   | <b>(1341)</b>   |          |
| <1 month                                                      | 89              | 6.6      |
| 1-2 months                                                    | 91              | 6.8      |
| 2-3 months                                                    | 128             | 9.5      |
| 3-5 months                                                    | 98              | 7.3      |
| >5 months                                                     | 853             | 63.6     |
| No wait                                                       | 82              | 6.1      |
| <b>Number of flight cancellation/changes</b>                  | <b>(1245)</b>   |          |
| Not applicable                                                | 319             | 25.6     |
| 0 changes                                                     | 152             | 12.2     |
| 1 cancellation or delay                                       | 245             | 19.7     |
| 2 cancellation or delay                                       | 196             | 15.7     |
| 3 cancellation or delay                                       | 147             | 11.8     |
| 4 cancellation or delay                                       | 65              | 5.2      |
| 5 cancellation or delay                                       | 31              | 2.5      |
| >5 cancellations or delays                                    | 90              | 7.2      |
| <b>Experiences while trying to return</b>                     | <b>(1245)</b>   |          |
| Limit on the number of people who could enter the country     | 740             | 59.4     |
| Inability to book a flight                                    | 671             | 53.9     |
| Flight cancellation                                           | 660             | 15.3     |
| COVID-19 testing requirements prior to flying                 | 281             | 22.6     |
| Other                                                         | 229             | 18.4     |
| Separation from family/companion                              | 172             | 13.8     |
| Visa issues                                                   | 147             | 11.8     |
| Delays during transit                                         | 44              | 3.5      |
| <b>Current situation</b>                                      | <b>(1245)</b>   |          |
| Booked a flight/waiting for flight availability               | 357             | 26.6     |
| Unable to return but have decided to stay                     | 352             | 26.2     |
| Returned to country of residence after delays                 | 323             | 24.1     |
| Other                                                         | 295             | 22       |
| Returned to country of residence after being stuck in transit | 14              | 1        |

**Table 3. Financial and employment characteristics of respondents stranded abroad during COVID-19**

| <b>Variables</b>                                                                                     | <b><i>n</i></b>          | <b>%</b>                         |
|------------------------------------------------------------------------------------------------------|--------------------------|----------------------------------|
| <b>Addressing financial stress</b>                                                                   | <b>(n/836 responses)</b> | <b>% of respondents (n=1127)</b> |
| Received financial support from family or friends                                                    | 354                      | 31.4                             |
| Other                                                                                                | 201                      | 17.8                             |
| Borrowed money from a bank                                                                           | 58                       | 5.1                              |
| Personal savings                                                                                     | 47                       | 4.2                              |
| Accessed emergency financial support from the organisation or services in the country you were stuck | 43                       | 3.8                              |
| Received financial support from your employer                                                        | 39                       | 3.5                              |
| Applied but did not receive a government loan                                                        | 39                       | 3.5                              |
| Early withdrawal of superannuation                                                                   | 27                       | 2.4                              |
| Received a government loan to cover your living costs                                                | 14                       | 1.2                              |
| Received a government loan to cover the cost of a flight home                                        | 8                        | 0.7                              |
| Received financial support from an insurance company                                                 | 6                        | 0.5                              |
| <b>Current employment situation</b>                                                                  | <b>(1250)</b>            |                                  |
| Working now for pay                                                                                  | 620                      | 56.0                             |
| Unemployed                                                                                           | 240                      | 21.7                             |
| Retired                                                                                              | 82                       | 7.4                              |
| Student                                                                                              | 88                       | 7.9                              |
| Unable to work due to disability or illness                                                          | 18                       | 1.6                              |
| Volunteer                                                                                            | 23                       | 2.1                              |
| Stay at home parent/caregiver                                                                        | 84                       | 7.6                              |
| Other                                                                                                | 95                       | 8.6                              |
| <b>Employment change while abroad</b>                                                                | <b>(n/717 responses)</b> | <b>% of respondents (n=1127)</b> |
| Worked remotely                                                                                      | 123                      | 10.9                             |
| Lost job                                                                                             | 119                      | 10.6                             |
| Other                                                                                                | 113                      | 10.0                             |
| Resigned                                                                                             | 77                       | 6.8                              |
| Contract not renewed                                                                                 | 69                       | 6.1                              |
| Reduction of hours                                                                                   | 63                       | 5.6                              |
| Stood down, not working for pay, but not fired                                                       | 45                       | 4.0                              |
| Pay cut                                                                                              | 32                       | 2.8                              |
| Back in paid work                                                                                    | 31                       | 2.8                              |
| Not working but receiving government assistance                                                      | 27                       | 2.4                              |
| Increase in hours                                                                                    | 18                       | 1.6                              |

**Table 3. Financial and employment characteristics of respondents stranded abroad during COVID-19**

| <b>Variables</b>                                                                                     | <b><i>n</i></b>          | <b>%</b>                         |
|------------------------------------------------------------------------------------------------------|--------------------------|----------------------------------|
| <b>Addressing financial stress</b>                                                                   | <b>(n/836 responses)</b> | <b>% of respondents (n=1127)</b> |
| Received financial support from family or friends                                                    | 354                      | 31.4                             |
| Other                                                                                                | 201                      | 17.8                             |
| Borrowed money from a bank                                                                           | 58                       | 5.1                              |
| Personal savings                                                                                     | 47                       | 4.2                              |
| Accessed emergency financial support from the organisation or services in the country you were stuck | 43                       | 3.8                              |
| Received financial support from your employer                                                        | 39                       | 3.5                              |
| Applied but did not receive a government loan                                                        | 39                       | 3.5                              |
| Early withdrawal of superannuation                                                                   | 27                       | 2.4                              |
| Received a government loan to cover your living costs                                                | 14                       | 1.2                              |
| Received a government loan to cover the cost of a flight home                                        | 8                        | 0.7                              |
| Received financial support from an insurance company                                                 | 6                        | 0.5                              |
| <b>Current employment situation</b>                                                                  | <b>(1250)</b>            |                                  |
| Working now for pay                                                                                  | 620                      | 56.0                             |
| Unemployed                                                                                           | 240                      | 21.7                             |
| Retired                                                                                              | 82                       | 7.4                              |
| Student                                                                                              | 88                       | 7.9                              |
| Unable to work due to disability or illness                                                          | 18                       | 1.6                              |
| Volunteer                                                                                            | 23                       | 2.1                              |
| Stay at home parent/caregiver                                                                        | 84                       | 7.6                              |
| Other                                                                                                | 95                       | 8.6                              |
| <b>Employment change while abroad</b>                                                                | <b>(n/717 responses)</b> | <b>% of respondents (n=1127)</b> |
| Worked remotely                                                                                      | 123                      | 10.9                             |
| Lost job                                                                                             | 119                      | 10.6                             |
| Other                                                                                                | 113                      | 10.0                             |
| Resigned                                                                                             | 77                       | 6.8                              |
| Contract not renewed                                                                                 | 69                       | 6.1                              |
| Reduction of hours                                                                                   | 63                       | 5.6                              |
| Stood down, not working for pay, but not fired                                                       | 45                       | 4.0                              |
| Pay cut                                                                                              | 32                       | 2.8                              |
| Back in paid work                                                                                    | 31                       | 2.8                              |
| Not working but receiving government assistance                                                      | 27                       | 2.4                              |
| Increase in hours                                                                                    | 18                       | 1.6                              |

**Table 4. Predictors of moderate to extremely severe depression, anxiety, and stress in respondents stranded abroad during COVID-19 (n=956)**

| Variables                         | Depression |         |                 | Anxiety     |         |                 | Stress |                 |             |       |       |                 |
|-----------------------------------|------------|---------|-----------------|-------------|---------|-----------------|--------|-----------------|-------------|-------|-------|-----------------|
|                                   | OR         | 95% C.I | <i>p</i>        | OR          | 95% C.I | <i>p</i>        | OR     | 95% C.I         | <i>p</i>    |       |       |                 |
| <b>Age (yrs)</b>                  |            |         | <b>.005</b>     |             |         | <b>.030</b>     |        |                 | <b>.007</b> |       |       |                 |
| 18-29*                            |            |         |                 |             |         |                 |        |                 |             |       |       |                 |
| 30-49                             | .535       | .366    | .780            | .646        | .461    | .906            | .644   | .452            | .917        |       |       |                 |
| 50-69                             | .542       | .350    | .839            | .563        | .375    | .845            | .579   | .383            | .873        |       |       |                 |
| >69                               | .303       | .097    | .945            | .767        | .238    | 2.407           | .174   | .046            | .660        |       |       |                 |
| <b>Perceived risk of COVID-19</b> |            |         | <b>.026</b>     |             |         | <b>.003</b>     |        |                 | <b>.003</b> |       |       |                 |
| Not applicable                    | 1.595      | .384    | 6.627           | 1.608       | .433    | 5.840           | 2.317  | .573            | 9.368       |       |       |                 |
| Low risk*                         |            |         |                 |             |         |                 |        |                 |             |       |       |                 |
| Moderate risk                     | 1.099      | .723    | 1.672           | .700        | .456    | 1.076           | 1.042  | .691            | 1.571       |       |       |                 |
| High risk                         | 1.617      | 1.147   | 2.279           | 1.364       | .973    | 1.912           | 1.708  | 1.223           | 2.387       |       |       |                 |
| <b>Time stranded</b>              |            |         | <b>&lt;.001</b> |             |         | <b>&lt;.001</b> |        |                 | <b>.003</b> |       |       |                 |
| No wait                           | .893       | .399    | 1.997           | .697        | .308    | 1.579           | .936   | .421            | 2.082       |       |       |                 |
| <1 month                          | .357       | .174    | .735            | .332        | .149    | .738            | .459   | .224            | .940        |       |       |                 |
| 1-2 months                        | .396       | .201    | .781            | .420        | .208    | .849            | .475   | .242            | .932        |       |       |                 |
| 2-3 months                        | .587       | .313    | 1.101           | .571        | .303    | 1.078           | .702   | .377            | 1.308       |       |       |                 |
| 3-5 months*                       |            |         |                 |             |         |                 |        |                 |             |       |       |                 |
| >5 months                         | 1.281      | .770    | 2.129           | .984        | .601    | 1.610           | 1.062  | .647            | 1.743       |       |       |                 |
| <b>Homelessness, ref.no</b>       | 1.522      | .947    | 2.444           | .082        | 1.392   | .920            | 2.105  | .118            | 1.186       | .767  | 1.834 | .444            |
| <b>Employment Change, ref.no</b>  | 1.405      | 1.040   | 1.900           | <b>.027</b> | 1.569   | 1.177           | 2.092  | <b>.002</b>     | 1.564       | 1.171 | 2.090 | <b>.002</b>     |
| <b>Financial Stress, ref.no</b>   | 1.501      | 1.103   | 2.041           | <b>.010</b> | 1.728   | 1.268           | 2.345  | <b>&lt;0.00</b> | 1.682       | 1.246 | 2.269 | <b>&lt;.001</b> |

1

\*Reference variable

OR, log odds ratio controlling for other variables in the model; EXP (B), adjusted odds ratio; C.I, confidence interval; *p*, probability value (statistically significant <.05).

1  
2  
3  
4  
5  
6  
7  
8  
9  
10  
11  
12  
13  
14  
15  
16  
17  
18  
19  
20  
21  
22  
23  
24  
25  
26  
27  
28  
29  
30  
31  
32  
33  
34  
35  
36  
37  
38  
39  
40  
41  
42  
43  
44  
45  
46  
47  
48  
49  
50  
51  
52  
53  
54  
55  
56  
57  
58  
59  
60

For peer review only

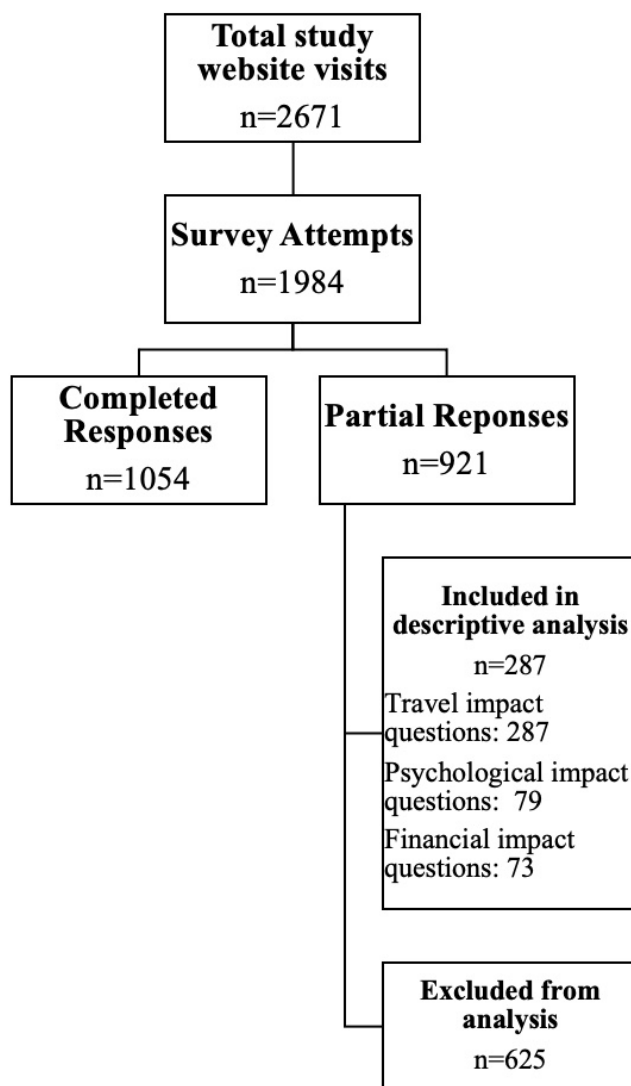

Figure 1. Flowchart of participant inclusion

117x177mm (144 x 144 DPI)

1  
2  
3  
4  
5  
6  
7  
8  
9  
10  
11  
12  
13  
14  
15  
16  
17  
18  
19  
20  
21  
22  
23  
24  
25  
26  
27  
28  
29  
30  
31  
32  
33  
34  
35  
36  
37  
38  
39  
40  
41  
42  
43  
44  
45  
46  
47  
48  
49  
50  
51  
52  
53  
54  
55  
56  
57  
58  
59  
60



Figure 2. Depression, anxiety, and stress categories of citizens stranded abroad during COVID-19 (% of sample)

427x94mm (144 x 144 DPI)

## Supplementary file 1. Associations between participant factors and levels of depression, anxiety, and stress

| Variables                              | Depression  |             |             |             |                  | $\chi^2$ | df | p     |
|----------------------------------------|-------------|-------------|-------------|-------------|------------------|----------|----|-------|
|                                        | Normal      | Mild        | Moderate    | Severe      | Extremely Severe |          |    |       |
| <b>Age</b>                             |             |             |             |             |                  | 33.482   | 12 | <.001 |
| 18-29                                  | 38 (15.4%)  | 19 (14.4%)  | 55 (21.7%)  | 41 (25.8%)  | 73 (27.8%)       |          |    |       |
| 30-49                                  | 121 (49.2%) | 79 (59.8%)  | 131 (51.6%) | 77 (48.4%)  | 137 (52.1%)      |          |    |       |
| 50-69                                  | 76 (30.9%)  | 33 (25%)    | 64 (25.2%)  | 38 (23.9%)  | 51 (19.4%)       |          |    |       |
| 70+                                    | 11 (4.5%)   | 1 (0.8%)    | 4 (1.6%)    | 3 (1.9%)    | 2 (0.8%)         |          |    |       |
| <b>Time stranded abroad</b>            |             |             |             |             |                  | 82.982   | 20 | <.001 |
| No wait                                | 20 (7.8%)   | 4 (2.7%)    | 12 (4.4%)   | 6 (3.5%)    | 11 (3.9%)        |          |    |       |
| Up to 1 month                          | 32 (12.4%)  | 16 (11%)    | 14 (5.1%)   | 5 (2.9%)    | 7 (2.5%)         |          |    |       |
| 1-2 months                             | 32 (12.4%)  | 10 (6.8%)   | 23 (8.4%)   | 7 (4.1%)    | 8 (2.8%)         |          |    |       |
| 2-3 months                             | 32 (12.4%)  | 18 (12.3%)  | 22 (8%)     | 22 (12.8%)  | 23 (8.1%)        |          |    |       |
| 4-5 months                             | 21 (8.1%)   | 15 (10.3%)  | 22 (8%)     | 15 (8.7%)   | 21 (7.4%)        |          |    |       |
| 5+ months                              | 121 (46.9%) | 83 (56.8%)  | 181 (66.1%) | 117 (68%)   | 213 (75.3%)      |          |    |       |
| <b>Financial stress</b>                |             |             |             |             |                  | 35.123   | 4  | <.001 |
| Yes                                    | 140 (54.3%) | 85 (58.6%)  | 172 (63%)   | 109 (64.1%) | 218 (77.6%)      |          |    |       |
| No                                     | 118 (45.7%) | 60 (41.4%)  | 101 (37%)   | 61 (35.9%)  | 63 (22.4%)       |          |    |       |
| <b>Homelessness</b>                    |             |             |             |             |                  | 30.149   | 4  | <.001 |
| Yes                                    | 17 (6.6%)   | 16 (11.3%)  | 26 (9.7%)   | 16 (9.5%)   | 58 (20.9%)       |          |    |       |
| No                                     | 239 (93.4%) | 125 (88.7%) | 243 (90.3%) | 152 (90.5%) | 220 (79.1%)      |          |    |       |
| <b>Employment Change</b>               |             |             |             |             |                  | 22.648   | 4  | <.001 |
| Yes                                    | 89 (38.2%)  | 45 (34.9%)  | 107 (43.5%) | 74 (49%)    | 138 (55.9%)      |          |    |       |
| No                                     | 144 (61.8%) | 84 (65.1%)  | 139 (56.5%) | 77 (51%)    | 109 (44.1%)      |          |    |       |
| <b>Flight changes or cancellations</b> |             |             |             |             |                  | 36.694   | 24 | .029  |
| 0 changes                              | 23 (11.5%)  | 21 (20%)    | 31 (17.3%)  | 21 (16.9%)  | 26 (12.9%)       |          |    |       |
| 1 cancelation or delay                 | 70 (35%)    | 28 (26.7%)  | 48 (26.8%)  | 34 (27.4%)  | 34 (16.8%)       |          |    |       |



|                                                            |               |             |                 |               |                         |                      |           |          |
|------------------------------------------------------------|---------------|-------------|-----------------|---------------|-------------------------|----------------------|-----------|----------|
| 2 cancelations or delay                                    | 42 (21%)      | 20 (19%)    | 34 (19%)        | 30 (24.2%)    | 45 (22.3%)              |                      |           |          |
| 3 cancelations or delay                                    | 30 (15%)      | 18 (17.1%)  | 32 (17.9%)      | 21 (16.9%)    | 32 (15.8%)              |                      |           |          |
| 4 cancelations or delay                                    | 14 (7%)       | 6 (5.7%)    | 13 (7.3%)       | 6 (4.8%)      | 19 (9.4%)               |                      |           |          |
| 5 cancelations or delay                                    | 4 (2%)        | 3 (2.9%)    | 5 (2.8%)        | 3 (2.4%)      | 13 (6.4%)               |                      |           |          |
| 5+ cancelations or delay                                   | 17 (8.5%)     | 9 (8.6%)    | 16 (8.9%)       | 9 (7.3%)      | 33 (16.3%)              |                      |           |          |
| <b>Perceived risk of contracting COVID-19 (1-10 scale)</b> |               |             |                 |               |                         |                      |           |          |
| 1                                                          | 29 (11.2%)    | 13 (8.9%)   | 21 (7.7%)       | 8 (4.7%)      | 20 (7.1%)               |                      |           |          |
| 2                                                          | 34 (13.2%)    | 10 (6.8%)   | 12 (4.4%)       | 6 (3.5%)      | 14 (4.9%)               |                      |           |          |
| 3                                                          | 25 (9.7%)     | 11 (7.5%)   | 21 (7.7%)       | 14 (8.1%)     | 17 (6%)                 |                      |           |          |
| 4                                                          | 13 (5%)       | 7 (4.8%)    | 12 (4.4%)       | 6 (3.5%)      | 12 (4.2%)               |                      |           |          |
| 5                                                          | 31 (12%)      | 19 (13%)    | 21 (7.7%)       | 16 (9.3%)     | 24 (8.5%)               |                      |           |          |
| 6                                                          | 10 (3.9%)     | 8 (5.5%)    | 19 (6.9%)       | 11 (6.4%)     | 13 (4.6%)               |                      |           |          |
| 7                                                          | 28 (10.9%)    | 16 (11%)    | 35 (12.8%)      | 19 (11%)      | 29 (10.2%)              |                      |           |          |
| 8                                                          | 30 (11.6%)    | 14 (9.6%)   | 35 (12.8%)      | 31 (18%)      | 40 (14.1%)              |                      |           |          |
| 9                                                          | 14 (5.4%)     | 12 (8.2%)   | 17 (6.2%)       | 5 (2.9%)      | 21 (7.4%)               |                      |           |          |
| 10                                                         | 42 (16.3%)    | 32 (21.9%)  | 75 (27.4%)      | 51 (29.7%)    | 83 (29.3%)              |                      |           |          |
| Not Applicable                                             | 2 (0.8%)      | 4 (2.7%)    | 6 (2.2%)        | 5 (2.9%)      | 10 (3.5%)               | 3.314                | 4         | .507     |
| <b>Access to crisis support or mental health services</b>  |               |             |                 |               |                         |                      |           |          |
| Yes                                                        | 95 (36.8%)    | 55 (37.7%)  | 109 (39.8%)     | 63 (36.6%)    | 92 (32.5%)              |                      |           |          |
| No                                                         | 163 (63.2%)   | 91 (62.35)  | 165 (60.2%)     | 109 (63.4%)   | 191 (67.5%)             | <b>Anxiety</b>       |           |          |
| <b>Variables</b>                                           | <b>Normal</b> | <b>Mild</b> | <b>Moderate</b> | <b>Severe</b> | <b>Extremely Severe</b> | <b>χ<sup>2</sup></b> | <b>df</b> | <b>p</b> |
| <b>Age</b>                                                 |               |             |                 |               |                         | 35.225               | 12        | <.001    |
| 18-29                                                      | 69 (15.4%)    | 36 (22.5%)  | 35 (25.7%)      | 36 (32.7%)    | 50 (25.1%)              |                      |           |          |
| 30-49                                                      | 229 (51%)     | 86 (53.8%)  | 66 (48.55)      | 52 (47.3%)    | 112 (56.3%)             |                      |           |          |
| 50-69                                                      | 138 (30.7%)   | 35 (21.9%)  | 32 (23.5%)      | 21 (19.1%)    | 36 (18.1%)              |                      |           |          |
| 70+                                                        | 13 (2.9%)     | 3 (1.9%)    | 3 (2.2%)        | 1 (0.9%)      | 1 (0.5%)                |                      |           |          |

|                                                           |             |             |             |             |             |        |    |       |
|-----------------------------------------------------------|-------------|-------------|-------------|-------------|-------------|--------|----|-------|
| <b>Time stranded abroad</b>                               |             |             |             |             |             | 49.486 | 20 | <.001 |
| No wait                                                   | 22 (4.5%)   | 12 (7%)     | 9 (6.3%)    | 3 (2.6%)    | 7 (3.3%)    |        |    |       |
| Up to 1 month                                             | 51 (10.5%)  | 8 (4.7%)    | 7 (4.9%)    | 3 (2.6%)    | 5 (2.3%)    |        |    |       |
| 1-2 months                                                | 43 (8.8%)   | 12 (7%)     | 6 (4.2%)    | 10 (8.6%)   | 9 (4.2%)    |        |    |       |
| 2-3 months                                                | 55 (11.3%)  | 20 (11.6%)  | 11 (7.7%)   | 15 (12.9%)  | 16 (7.4%)   |        |    |       |
| 4-5 months                                                | 38 (7.8%)   | 15 (8.7%)   | 17 (12.0%)  | 5 (4.3%)    | 19 (8.8%)   |        |    |       |
| 5+ months                                                 | 279 (57.2%) | 105 (61%)   | 92 (64.8%)  | 80 (69%)    | 7 (3.3%)    |        |    |       |
| <b>Financial stress</b>                                   |             |             |             |             |             | 53.944 | 4  | <.001 |
| Yes                                                       | 258 (53.2%) | 114 (66.3%) | 97 (68.8%)  | 85 (73.3%)  | 170 (79.8%) |        |    |       |
| No                                                        | 227 (46.8%) | 58 (33.7%)  | 44 (31.2%)  | 31 (26.7%)  | 43 (20.2%)  |        |    |       |
| <b>Homelessness</b>                                       |             |             |             |             |             | 18.517 | 4  | <.001 |
| Yes                                                       | 44 (9.2%)   | 15 (8.9%)   | 16 (11.4%)  | 16 (13.8%)  | 42 (20.1%)  |        |    |       |
| No                                                        | 434 (90.8%) | 154 (91.1%) | 124 (88.6%) | 100 (86.2%) | 167 (79.9%) |        |    |       |
| <b>Employment Change</b>                                  |             |             |             |             |             | 34.917 | 4  | <.001 |
| Yes                                                       | 156 (35.7%) | 66 (44.6%)  | 65 (50%)    | 57 (52.8%)  | 109 (59.6%) |        |    |       |
| No                                                        | 281 (64.3%) | 82 (55.4%)  | 65 (50%)    | 51 (47.2%)  | 74 (40.4%)  |        |    |       |
| <b>Flight changes or cancellations</b>                    |             |             |             |             |             | 29.009 | 24 | .220  |
| 0 changes                                                 | 50 (14.3%)  | 16 (13.7%)  | 19 (19.4%)  | 15 (17.2%)  | 22 (13.8%)  |        |    |       |
| 1 cancelation or delay                                    | 110 (31.5%) | 27 (23.1%)  | 21 (21.4%)  | 23 (26.4%)  | 33 (20.8%)  |        |    |       |
| 2 cancelations or delay                                   | 79 (22.6%)  | 23 (19.7%)  | 15 (15.3%)  | 13 (14.9%)  | 41 (25.8%)  |        |    |       |
| 3 cancelations or delay                                   | 48 (13.8%)  | 23 (19.7%)  | 22 (22.4%)  | 19 (21.8%)  | 21 (13.2%)  |        |    |       |
| 4 cancelations or delay                                   | 21 (6%)     | 9 (7.7%)    | 8 (8.2%)    | 7 (8%)      | 13 (8.2%)   |        |    |       |
| 5 cancelations or delay                                   | 9 (2.6%)    | 7 (6%)      | 2 (2%)      | 2 (2.3%)    | 8 (5%)      |        |    |       |
| 5+ cancelations or delay                                  | 32 (9.2%)   | 12 (10.3%)  | 11 (11.2%)  | 8 (9.2%)    | 21 (13.2%)  |        |    |       |
| <b>Perceived risk of contracted COVID-19 (1-10 scale)</b> |             |             |             |             |             | 81.128 | 40 | <.001 |
| 1                                                         | 47 (9.6%)   | 8 (4.7%)    | 12 (8.5%)   | 9 (7.8%)    | 15 (7%)     |        |    |       |
| 2                                                         | 49 (10%)    | 5 (2.9%)    | 7 (4.9%)    | 1 (0.9%)    | 14 (6.5%)   |        |    |       |

|                                                           |               |             |                 |               |                         |                            |           |                 |
|-----------------------------------------------------------|---------------|-------------|-----------------|---------------|-------------------------|----------------------------|-----------|-----------------|
| 3                                                         | 43 (8.8%)     | 11 (6.4%)   | 14 (9.9%)       | 6 (5.2%)      | 14 (6.5%)               |                            |           |                 |
| 4                                                         | 20 (4.1%)     | 14 (8.1%)   | 7 (4.9%)        | 2 (1.7%)      | 7 (3.3%)                |                            |           |                 |
| 5                                                         | 62 (12.7%)    | 13 (7.6%)   | 8 (5.6%)        | 9 (7.8%)      | 19 (8.8%)               |                            |           |                 |
| 6                                                         | 25 (5.1%)     | 13 (7.6%)   | 9 (6.3%)        | 5 (4.3%)      | 9 (4.2%)                |                            |           |                 |
| 7                                                         | 62 (12.7%)    | 15 (8.7%)   | 13 (9.2%)       | 17 (14.7%)    | 20 (9.3%)               |                            |           |                 |
| 8                                                         | 54 (11.1%)    | 32 (18.6%)  | 20 (14.1%)      | 15 (12.9%)    | 29 (13.5%)              |                            |           |                 |
| 9                                                         | 24 (4.9%)     | 17 (9.9%)   | 10 (7%)         | 7 (6%)        | 11 (5.1%)               |                            |           |                 |
| 10                                                        | 92 (18.9%)    | 39 (22.7%)  | 39 (27.5%)      | 41 (35.3%)    | 72 (33.5%)              |                            |           |                 |
| Not applicable                                            | 10 (2%)       | 5 (2.9%)    | 3 (2.1%)        | 4 (3.4%)      | 5 (2.3%)                |                            |           |                 |
| <b>Access to crisis support or mental health services</b> |               |             |                 |               |                         | 2.210                      | 4         | .697            |
| Yes                                                       | 188 (38.5%)   | 59 (34.3%)  | 49 (34.5%)      | 38 (32.8%)    | 80 (37.2%)              |                            |           |                 |
| No                                                        | 300 (61.5%)   | 113 (65.7%) | 93 (65.5%)      | 78 (67.2%)    | 135 (62.8%)             |                            |           |                 |
|                                                           | <b>Stress</b> |             |                 |               |                         |                            |           |                 |
| <b>Variables</b>                                          | <b>Normal</b> | <b>Mild</b> | <b>Moderate</b> | <b>Severe</b> | <b>Extremely Severe</b> | <b><math>\chi^2</math></b> | <b>df</b> | <b><i>p</i></b> |
| <b>Age</b>                                                |               |             |                 |               |                         | 51.326                     | 12        | <.001           |
| 18-29                                                     | 47 (15%)      | 23 (17.2%)  | 44 (21.3%)      | 69 (29.9%)    | 43 (25.4%)              |                            |           |                 |
| 30-49                                                     | 154 (49.2%)   | 76 (56.7%)  | 106 (51.2%)     | 113 (48.9%)   | 96 (56.8%)              |                            |           |                 |
| 50-69                                                     | 96 (30.7%)    | 34 (25.4%)  | 56 (27.1%)      | 46 (19.9%)    | 30 (17.8%)              |                            |           |                 |
| 70+                                                       | 16 (5.1%)     | 1 (0.7%)    | 1 (0.5%)        | 3 (1.3%)      | 0                       |                            |           |                 |
| <b>Time stranded abroad</b>                               |               |             |                 |               |                         | 50.180                     | 20        | <.001           |
| No wait                                                   | 22 (6.7%)     | 3 (2.1%)    | 12 (5.4%)       | 12 (4.7%)     | 4 (2.2%)                |                            |           |                 |
| Up to 1 month                                             | 38 (11.5%)    | 9 (6.2%)    | 9 (4%)          | 13 (5.1%)     | 5 (2.8%)                |                            |           |                 |
| 1-2 months                                                | 27 (8.2%)     | 15 (10.3%)  | 16 (7.1%)       | 16 (6.3%)     | 6 (3.3%)                |                            |           |                 |
| 2-3 months                                                | 36 (10.9%)    | 15 (10.3%)  | 23 (10.3%)      | 30 (11.9%)    | 13 (7.2%)               |                            |           |                 |
| 4-5 months                                                | 28 (8.5%)     | 11 (7.6%)   | 17 (7.6%)       | 27 (10.7%)    | 11 (6.1%)               |                            |           |                 |
| 5+ months                                                 | 179(54.2%)    | 92 (63.4%)  | 147 (65.6%)     | 155 (61.3%)   | 142 (78.5%)             |                            |           |                 |
| <b>Financial stress</b>                                   |               |             |                 |               |                         | 40.368                     | 4         | <.001           |
| Yes                                                       | 176 (53.5%)   | 85 (58.6%)  | 146 (65.8%)     | 174 (69%)     | 143(79.9%)              |                            |           |                 |

|                                                           |             |             |             |             |             |        |    |       |
|-----------------------------------------------------------|-------------|-------------|-------------|-------------|-------------|--------|----|-------|
| No                                                        | 153 (46.5%) | 60(41.4%)   | 76 (34.2%)  | 78 (31%)    | 36 (20.1%)  |        |    |       |
| <b>Homelessness</b>                                       |             |             |             |             |             | 13.393 | 4  | .010  |
| Yes                                                       | 28 (8.5%)   | 15 (10.7%)  | 24 (10.9%)  | 32 (13%)    | 34 (19.3%)  |        |    |       |
| No                                                        | 300 (91.5%) | 125 (89.3%) | 197 (89.1%) | 215 (87%)   | 142 (80.7%) |        |    |       |
| <b>Employment Change</b>                                  |             |             |             |             |             | 31.232 | 4  | <.001 |
| Yes                                                       | 101 (33.8%) | 50 (40.7%)  | 96 (47.1%)  | 113 (51.4%) | 93 (58.1%)  |        |    |       |
| No                                                        | 198 (66.2%) | 73 (59.3%)  | 108 (52.9%) | 107 (48.6%) | 67 (41.9%)  |        |    |       |
| <b>Flight changes or cancellations</b>                    |             |             |             |             |             | 27.073 | 24 | .301  |
| 0 changes                                                 | 28 (11.5%)  | 15 (15%)    | 28 (18.8%)  | 31 (17%)    | 20 (14.8%)  |        |    |       |
| 1 cancelation or delay                                    | 79 (32.4%)  | 26 (26%)    | 43 (28.9%)  | 42 (23.1%)  | 24 (17.8%)  |        |    |       |
| 2 cancelations or delay                                   | 56 (23%)    | 21 (21%)    | 31 (20.8%)  | 36 (19.8%)  | 27 (20%)    |        |    |       |
| 3 cancelations or delay                                   | 36 (14.8%)  | 18 (18%)    | 24 (16.1%)  | 32 (17.6%)  | 23 (17%)    |        |    |       |
| 4 cancelations or delay                                   | 16 (6.6%)   | 6 (6%)      | 11 (7.4%)   | 14 (7.7%)   | 11 (8.1%)   |        |    |       |
| 5 cancelations or delay                                   | 9 (3.7%)    | 2 (2%)      | 2 (1.3%)    | 7 (3.8%)    | 8 (5.9%)    |        |    |       |
| 5+ cancelations or delay                                  | 20 (8.2%)   | 12 (12%)    | 10 (6.7%)   | 20 (11%)    | 22 (16.3%)  |        |    |       |
| <b>Perceived risk of contracted COVID-19 (1-10 scale)</b> |             |             |             |             |             | 66.487 | 40 | .005  |
| 1                                                         | 35 (10.6%)  | 11 (7.6%)   | 14 (6.3%)   | 16 (6.3%)   | 15 (8.3%)   |        |    |       |
| 2                                                         | 34 (10.3%)  | 10 (6.9%)   | 14 (6.3%)   | 11 (4.3%)   | 7 (3.9%)    |        |    |       |
| 3                                                         | 28 (8.5%)   | 14 (9.7%)   | 18 (8%)     | 20 (7.9%)   | 8 (4.4%)    |        |    |       |
| 4                                                         | 17 (5.2%)   | 7 (4.8%)    | 7 (3.1%)    | 13 (5.1%)   | 6 (3.3%)    |        |    |       |
| 5                                                         | 40 (12.1%)  | 15 (10.3%)  | 22 (9.8%)   | 19 (7.5%)   | 15 (8.35)   |        |    |       |
| 6                                                         | 21 (6.4%)   | 6 (4.1%)    | 12 (5.4%)   | 13 (5.1%)   | 9 (5%)      |        |    |       |
| 7                                                         | 34 (10.3%)  | 26 (17.9%)  | 24 (10.7%)  | 27 (10.7%)  | 16 (8.8%)   |        |    |       |
| 8                                                         | 41 (12.4%)  | 18 (12.4%)  | 35 (15.6%)  | 30 (11.9%)  | 26 (14.4%)  |        |    |       |
| 9                                                         | 14 (4.2%)   | 10 (6.9%)   | 20 (8.9%)   | 18 (7.1%)   | 7 (3.9%)    |        |    |       |
| 10                                                        | 62 (18.8%)  | 25 (17.2%)  | 53 (23.7%)  | 78 (30.8%)  | 65 (35.9%)  |        |    |       |
| Not applicable                                            | 4 (1.2%)    | 3 (2.1%)    | 5 (2.2%)    | 8 (3.2%)    | 7 (3.9%)    |        |    |       |

1  
2  
3  
4  
5  
6  
7  
8  
9  
10  
11  
12  
13  
14  
15  
16  
17  
18  
19  
20  
21  
22  
23  
24  
25  
26  
27  
28  
29  
30  
31  
32  
33  
34  
35  
36  
37  
38  
39  
40  
41  
42  
43  
44  
45  
46

|                                                                                                                                   |             |            |             |             |             |       |   |      |
|-----------------------------------------------------------------------------------------------------------------------------------|-------------|------------|-------------|-------------|-------------|-------|---|------|
| <b>Access to crisis support or mental health services</b>                                                                         |             |            |             |             |             | 3.371 | 4 | .498 |
| Yes                                                                                                                               | 113 (34.2%) | 60 (41.4%) | 82 (36.6%)  | 98 (38.7%)  | 61 (33.7%)  |       |   |      |
| No                                                                                                                                | 217 (65.8%) | 85 (58.6%) | 142 (63.4%) | 155 (61.3%) | 120 (66.3%) |       |   |      |
| <b><math>\chi^2</math>, chi squared; df, degrees of freedom; <i>p</i>, probability value (statistically significant &lt;.05).</b> |             |            |             |             |             |       |   |      |

For peer review only

STROBE Statement—Checklist of items that should be included in reports of *cross-sectional studies*

|                              | Item No | Recommendation                                                                                                                                                                                    | Page No  |
|------------------------------|---------|---------------------------------------------------------------------------------------------------------------------------------------------------------------------------------------------------|----------|
| <b>Title and abstract</b>    | 1       | (a) Indicate the study's design with a commonly used term in the title or the abstract                                                                                                            | 1        |
|                              |         | (b) Provide in the abstract an informative and balanced summary of what was done and what was found                                                                                               | 2        |
| <b>Introduction</b>          |         |                                                                                                                                                                                                   |          |
| Background/rationale         | 2       | Explain the scientific background and rationale for the investigation being reported                                                                                                              | 4        |
| Objectives                   | 3       | State specific objectives, including any prespecified hypotheses                                                                                                                                  | 4        |
| <b>Methods</b>               |         |                                                                                                                                                                                                   |          |
| Study design                 | 4       | Present key elements of study design early in the paper                                                                                                                                           | 5        |
| Setting                      | 5       | Describe the setting, locations, and relevant dates, including periods of recruitment, exposure, follow-up, and data collection                                                                   | 5        |
| Participants                 | 6       | (a) Give the eligibility criteria, and the sources and methods of selection of participants                                                                                                       | 5        |
| Variables                    | 7       | Clearly define all outcomes, exposures, predictors, potential confounders, and effect modifiers. Give diagnostic criteria, if applicable                                                          | 5        |
| Data sources/<br>measurement | 8*      | For each variable of interest, give sources of data and details of methods of assessment (measurement). Describe comparability of assessment methods if there is more than one group              | 5        |
| Bias                         | 9       | Describe any efforts to address potential sources of bias                                                                                                                                         | 5        |
| Study size                   | 10      | Explain how the study size was arrived at                                                                                                                                                         |          |
| Quantitative variables       | 11      | Explain how quantitative variables were handled in the analyses. If applicable, describe which groupings were chosen and why                                                                      | 5        |
| Statistical methods          | 12      | (a) Describe all statistical methods, including those used to control for confounding                                                                                                             | 6        |
|                              |         | (b) Describe any methods used to examine subgroups and interactions                                                                                                                               | 6        |
|                              |         | (c) Explain how missing data were addressed                                                                                                                                                       | 6        |
|                              |         | (d) If applicable, describe analytical methods taking account of sampling strategy                                                                                                                | 6        |
|                              |         | (e) Describe any sensitivity analyses                                                                                                                                                             | 6        |
| <b>Results</b>               |         |                                                                                                                                                                                                   |          |
| Participants                 | 13*     | (a) Report numbers of individuals at each stage of study—eg numbers potentially eligible, examined for eligibility, confirmed eligible, included in the study, completing follow-up, and analysed | 7        |
|                              |         | (b) Give reasons for non-participation at each stage                                                                                                                                              | 7        |
|                              |         | (c) Consider use of a flow diagram                                                                                                                                                                | Figure 1 |
| Descriptive data             | 14*     | (a) Give characteristics of study participants (eg demographic, clinical, social) and information on exposures and potential confounders                                                          | 7        |
|                              |         | (b) Indicate number of participants with missing data for each variable of interest                                                                                                               | Tables   |
| Outcome data                 | 15*     | Report numbers of outcome events or summary measures                                                                                                                                              | 7/8      |

1  
2  
3  
4  
5  
6  
7  
8  
9  
10  
11  
12  
13  
14  
15  
16  
17  
18  
19  
20  
21  
22  
23  
24  
25  
26  
27  
28  
29  
30  
31  
32  
33  
34  
35  
36  
37  
38  
39  
40  
41  
42  
43  
44  
45  
46  
47  
48  
49  
50  
51  
52  
53  
54  
55  
56  
57  
58  
59  
60

|                          |    |                                                                                                                                                                                                              |       |
|--------------------------|----|--------------------------------------------------------------------------------------------------------------------------------------------------------------------------------------------------------------|-------|
| Main results             | 16 | (a) Give unadjusted estimates and, if applicable, confounder-adjusted estimates and their precision (eg, 95% confidence interval). Make clear which confounders were adjusted for and why they were included | 7/8   |
|                          |    | (b) Report category boundaries when continuous variables were categorized                                                                                                                                    |       |
|                          |    | (c) If relevant, consider translating estimates of relative risk into absolute risk for a meaningful time period                                                                                             |       |
| Other analyses           | 17 | Report other analyses done—eg analyses of subgroups and interactions, and sensitivity analyses                                                                                                               | 7/8   |
| <b>Discussion</b>        |    |                                                                                                                                                                                                              |       |
| Key results              | 18 | Summarise key results with reference to study objectives                                                                                                                                                     | 9     |
| Limitations              | 19 | Discuss limitations of the study, taking into account sources of potential bias or imprecision. Discuss both direction and magnitude of any potential bias                                                   | 12    |
| Interpretation           | 20 | Give a cautious overall interpretation of results considering objectives, limitations, multiplicity of analyses, results from similar studies, and other relevant evidence                                   | 12    |
| Generalisability         | 21 | Discuss the generalisability (external validity) of the study results                                                                                                                                        | 10-12 |
| <b>Other information</b> |    |                                                                                                                                                                                                              |       |
| Funding                  | 22 | Give the source of funding and the role of the funders for the present study and, if applicable, for the original study on which the present article is based                                                | NA    |

\*Give information separately for exposed and unexposed groups.

**Note:** An Explanation and Elaboration article discusses each checklist item and gives methodological background and published examples of transparent reporting. The STROBE checklist is best used in conjunction with this article (freely available on the Web sites of PLoS Medicine at <http://www.plosmedicine.org/>, Annals of Internal Medicine at <http://www.annals.org/>, and Epidemiology at <http://www.epidem.com/>). Information on the STROBE Initiative is available at [www.strobe-statement.org](http://www.strobe-statement.org).

# BMJ Open

## International cross-sectional study examining the psychological and financial impact of travel restrictions on citizens and permanent residents stranded abroad during the COVID-19 pandemic

|                                 |                                                                                                                                                                                                                                                                                                                                                                                                                            |
|---------------------------------|----------------------------------------------------------------------------------------------------------------------------------------------------------------------------------------------------------------------------------------------------------------------------------------------------------------------------------------------------------------------------------------------------------------------------|
| Journal:                        | <i>BMJ Open</i>                                                                                                                                                                                                                                                                                                                                                                                                            |
| Manuscript ID                   | bmjopen-2021-059922.R2                                                                                                                                                                                                                                                                                                                                                                                                     |
| Article Type:                   | Original research                                                                                                                                                                                                                                                                                                                                                                                                          |
| Date Submitted by the Author:   | 04-May-2022                                                                                                                                                                                                                                                                                                                                                                                                                |
| Complete List of Authors:       | McDermid, Pippa; University of New South Wales, School of Population Health<br>Craig, Adam; University of New South Wales, School of Population Health<br>Sheel, Meru; The University of Sydney, Sydney School of Public Health<br>Blazek, Katrina; University of New South Wales, School of Population Health<br>Talty, Siobhan; The Me AL/TA<br>Seale, Holly; University of New South Wales, School of Population Health |
| <b>Primary Subject Heading</b>: | Infectious diseases                                                                                                                                                                                                                                                                                                                                                                                                        |
| Secondary Subject Heading:      | Global health, Public health, Mental health                                                                                                                                                                                                                                                                                                                                                                                |
| Keywords:                       | COVID-19, Public health < INFECTIOUS DISEASES, MENTAL HEALTH, INFECTIOUS DISEASES                                                                                                                                                                                                                                                                                                                                          |
|                                 |                                                                                                                                                                                                                                                                                                                                                                                                                            |

SCHOLARONE™  
Manuscripts





I, the Submitting Author has the right to grant and does grant on behalf of all authors of the Work (as defined in the below author licence), an exclusive licence and/or a non-exclusive licence for contributions from authors who are: i) UK Crown employees; ii) where BMJ has agreed a CC-BY licence shall apply, and/or iii) in accordance with the terms applicable for US Federal Government officers or employees acting as part of their official duties; on a worldwide, perpetual, irrevocable, royalty-free basis to BMJ Publishing Group Ltd ("BMJ") its licensees and where the relevant Journal is co-owned by BMJ to the co-owners of the Journal, to publish the Work in this journal and any other BMJ products and to exploit all rights, as set out in our [licence](#).

The Submitting Author accepts and understands that any supply made under these terms is made by BMJ to the Submitting Author unless you are acting as an employee on behalf of your employer or a postgraduate student of an affiliated institution which is paying any applicable article publishing charge ("APC") for Open Access articles. Where the Submitting Author wishes to make the Work available on an Open Access basis (and intends to pay the relevant APC), the terms of reuse of such Open Access shall be governed by a Creative Commons licence – details of these licences and which [Creative Commons](#) licence will apply to this Work are set out in our licence referred to above.

Other than as permitted in any relevant BMJ Author's Self Archiving Policies, I confirm this Work has not been accepted for publication elsewhere, is not being considered for publication elsewhere and does not duplicate material already published. I confirm all authors consent to publication of this Work and authorise the granting of this licence.

1  
2  
3 **International cross-sectional study examining the psychological and financial impact of**  
4 **travel restrictions on citizens and permanent residents stranded abroad during the**  
5 **COVID-19 pandemic**  
6  
7  
8  
9

10 **Authors: Pippa McDermid<sup>1</sup>, Adam Craig<sup>1</sup>, Meru Sheel<sup>2</sup>, Katrina Blazek<sup>1</sup>, Siobhan**  
11 **Talty<sup>3</sup>, and Holly Seale<sup>1</sup>**  
12  
13

14  
15 **Authors Affiliations**  
16

- 17 1. School of Population Health, University of New South Wales, Sydney, NSW, Australia.  
18 2. Sydney School of Public Health, Faculty of Health and Medicine, the University of  
19 Sydney, Sydney, NSW, Australia.  
20 3. Freelance Monitoring, Evaluation, Accountability and Learning Technical Advisor,  
21 ME(AL). TA  
22  
23  
24  
25  
26

27 Correspondence  
28

29 Associate Professor. Holly Seale  
30 School of Population Health  
31 Level 2, Samuels Building  
32 Faculty of Medicine, UNSW Australia  
33 Sydney 2052, Australia  
34 Telephone: +61 (2) 9385 3129  
35 Email: [h.seale@unsw.edu.au](mailto:h.seale@unsw.edu.au)  
36  
37  
38  
39  
40  
41

42 Word count: 3664

43 Abstract: 295; Main body: 3563

44 Keywords: COVID-19; Pandemic; Public Health; Travel; Depression; Anxiety; Stress  
45  
46  
47  
48  
49  
50  
51  
52  
53  
54  
55  
56  
57  
58  
59  
60

## ABSTRACT

**Objectives:** This study aimed to evaluate the psychological and financial distress reported by citizens and permanent residents stranded abroad due to international travel restrictions introduced in response to the COVID-19 pandemic.

**Design:** An international cross-sectional study.

**Setting:** A primary analysis of data collected between July and September 2021 through an online survey targeting individuals stranded abroad and unable to return to their country of residence due to international travel restrictions.

**Respondents:** A total of 1054 individuals aged 18-84.

**Data analysis:** Multivariable logistic regression models were used to explore the relationship between higher levels of depression, anxiety and stress and participant variables.

**Outcome measures:** The survey answered questions regarding COVID-19 travel restriction-related impacts; personal stress, anxiety, and depression (using the validated DASS-21 tool); as well as impacts on housing and financial security and demographic data.

**Results:** A total of 75.4% of respondents reported wanting to return to the Oceania region (75.4%), with 45% stranded in Europe. 64.2% reported financial distress while stranded abroad. 64.4% ( $\bar{x}=9.43$ ,  $SD=5.81$ ) reported moderate-to- extremely severe (based on the DASS-21 classification) levels of depression, 41.7% for anxiety ( $\bar{x}=5.46$ ,  $SD=4.74$ ), and 58.1% for stress ( $\bar{x}=10.64$ ,  $SD=5.26$ ). Multivariable analysis indicated that financial stress, an employment change, being <30yrs, having a high perceived risk of contracting COVID-19 abroad and being stranded for >2 months, were significantly related to scores of moderate-to-extremely severe depression, anxiety, and stress.

**Conclusion:** The study is among the first to explore the psychological and financial distress-related impacts associated with being stranded abroad due to COVID-19 travel restrictions. It highlights a range of unintended consequences that arise from pandemic-related travel restriction, identifies the health and social needs of a particularly vulnerable population, and provides clues as to the types of support that may be adopted to best support them.

### STRENGTHS AND LIMITATIONS OF THIS STUDY

- This study was open to participants worldwide to support a broad insight into the psychological and financial impact of COVID-19 related travel restrictions.
- This study addressed the psychological impact of COVID-19 related travel restrictions using the validated DASS-21 tool, strengthening statistical analyses.
- Multivariable analyses were conducted on respondents' depression, anxiety, and stress scores to explore predictor and protective factors.
- Psychological data were collected on self-reported scales, leading to responder bias.
- Participant recruitment relied on convenience sampling and may not have captured impacted individuals from all relevant countries.

## BACKGROUND

In response to the COVID-19 pandemic, most countries worldwide have implemented some level of international travel restriction or complete border closures (1-3). As of February 2020, many countries had commenced repatriation of their citizens stranded abroad. By the end of 2020, some countries like Japan and Spain claimed to have repatriated entirely every citizen that wanted to return reports continue to suggest stranded travellers were still trying to get to their country of residence (referred to as 'home') 20 months into the COVID-19 pandemic despite many countries reopening borders (4, 5). In September 2021, every country has some level of travel restrictions (except those without data), with many countries still maintaining total border closures, while others had in place quarantine systems, screening measures and travel bans on high-risk regions (6).

Factors impacting a person's ability to return to their home have included countries placing limits on the number of passengers that can enter the country, caps on the hotel quarantine capacities, the cost of travel and hotel quarantine, and in some cases having restrictions on flights from certain high-risk countries. Our previous study suggested that the support available to those stranded abroad was limited and in some cases, challenging to access and comprehend (7). Support provided by countries has varied from repatriation flights, emergency accommodation, mental health and medical assistance, emergency call lines and financial assistance. However, of the countries that were reviewed, we were unable to identify any one country providing all the different support types listed.

Public commentary through news and social media has hinted at the level of psychosocial impact on citizens stranded abroad. These articles suggest that many of these travellers: have felt abandoned by their governments, had little financial support, and for some, experienced depression and homelessness (8-10). While the findings from many COVID-19 studies have reported high levels of psychological distress in nearly all populations, the focus of these studies has been on domestic populations, like healthcare and frontline workers, students and those in lockdown and quarantine (10-19). With similar aims to the present study, one study found 63% of Saudi citizens living abroad as students during COVID-19 experienced 'psychiatric' distress symptoms (20).

Even though travel restrictions have been in place since early 2020, there is currently limited understanding of the level of psychological distress that has been experienced by those stranded abroad wanting to return. This study examined the impacts of travel restrictions on people stranded abroad who could not return to their country of citizenship/residence during the COVID-19 pandemic. We aimed to 1) measure the prevalence of psychological impact

1  
2  
3 associated with being stranded overseas due to covid-related travel restrictions and 2) identify  
4 demographic and circumstantial factors associated with severe psychological impact.

## 5 6 **METHODS**

### 7 8 **Population and procedures**

9  
10 An online survey was created and administered anonymously using the *Qualtrics* (21) survey  
11 platform, with respondents recruited through various social media channels. Respondents  
12 were those people who were either still stranded away from their country of residence/home  
13 or had been stranded at some point since the commencement of the COVID-19 pandemic.  
14 There were no limitations placed on the country of residence or the length of time the person  
15 had been stranded for. To meet the inclusion criteria, respondents had to self-identify as  
16 having attempted to return to their country of residence but have had their travel plans  
17 changed. The survey was open between 20 July 2021 and 24 September 2021. Respondents  
18 unique IP addresses prevented duplicate entries. Ethical approval for this study was granted  
19 by the UNSW Human Research Ethics Committee (#210418). All respondents indicated their  
20 consent to participate. This study did not receive any funding.

### 21 22 **Patient and Public Involvement**

23  
24 No patient involved

### 25 26 **Survey instruments and measures**

27  
28 Demographics: including gender, age, level of education, ethnicity, employment status,  
29 history of chronic illness, and living status. Ethnicity was classified based on the nine broad  
30 groups according to the Australian Standard Classification of Cultural and Ethnic Groups  
31 (22).

32  
33 Travel experiences: Respondents were asked where they were stranded abroad and where  
34 they intended to return to, and this data was recoded into geographic groups based on the  
35 World Health Organisation regions (23). Questions focused on their current situation  
36 (whether they had returned, were still stranded abroad awaiting return or still abroad but had  
37 decided to stay), flight cancellations/delays, length of time waiting to return and their  
38 experiences with travel.

39  
40 Mental wellbeing: The depression, anxiety, and stress scale (DASS-21) were used in this  
41 study (24). The DASS-21 is a validated self-report tool, previously used in COVID-19  
42 research studies (14, 25), containing 21 items assessing scores of depression, anxiety, and  
43 stress symptoms (7 items each). Respondents were asked to reflect on when they were  
44 stranded abroad (for respondents who had already returned reflecting on the last two weeks  
45 and rate each statement on a 4-point Likert scale from 0 (unsure/do not recall; did not apply

1  
2  
3 to me at all) to 3 (applied to me very much, or most of the time). Scores in subsection are  
4 then multiplied by 2 to give a final score categorising the depression, anxiety, and stress into  
5 normal (Depression: 0-9; Anxiety: 0-7; Stress: 0-14), mild (Depression: 10-13; Anxiety: 8-9;  
6 Stress: 15-18), moderate (Depression: 14-20; Anxiety: 10-14; Stress: 19-25), severe  
7 (Depression: 21-27; Anxiety: 15-19; Stress: 26-33), or extremely severe (Depression: 28+;  
8 Anxiety: 20+; Stress: 34+). Higher scores reflect increased emotional and psychological  
9 distress.

10  
11 As we suspected some potential respondents had returned home already and could be  
12 potentially reflecting further than 2 weeks, we included an additional option of “unsure/do  
13 not recall”, with any respondent who selects this option to be removed for DASS21 analysis,  
14 which would allow for removal of recall bias during the analyses phase. Respondents were  
15 asked whether they had access to crisis support or mental health services while abroad and if  
16 ‘yes’, whether they had used this service or support. Finally, respondents reported their  
17 perceived risk of contracting COVID-19 both in the country where they are/were stranded  
18 and the country where they had or were waiting to return to (Scale of 1-10; 1 being no risk  
19 and 10 being high risk).

20  
21 Financial wellbeing: Respondents were initially asked whether they felt financial stress while  
22 stranded abroad (yes/no), then if ‘yes’ were asked how they addressed the financial stress  
23 (receiving financial support from family, government loans, bank credit, or social services).  
24 Questions on employment situation and changes while abroad were asked along with a  
25 question on whether the participant experienced homelessness while abroad. Homelessness  
26 was defined as a period where respondents did not have somewhere to stay/live.

### 27 28 29 30 31 32 33 34 35 36 37 38 39 40 41 **Statistical analyses**

42  
43 We aimed to collect responses from a minimum of 1,200 people to allow analysis with a  
44 margin of error of approximately 3.2%. Descriptive analysis involved the calculation of  
45 means, standard deviation, confidence interval and standard errors. Chi-square test of  
46 independence were first used to compare categorical variables. Independent variables that  
47 showed a significant association with DASS severity scores at a  $p < .2$  level was included in  
48 the model as predictor variables. The DASS scores were dichotomised to reflect either  
49 no/mild symptom severity or moderate to extremely severe. Multivariable logistic regression  
50 was then performed to analyse the effect of age, perceived risk of contracting COVID-19  
51 while stranded, financial stress, time stranded, employment change and homelessness on  
52 predicting moderate to extremely DASS. No multicollinearity amongst variables was  
53  
54  
55  
56  
57  
58  
59  
60

1  
2  
3 identified. P values of  $<.05$  was considered statistically significant. All data analyses were  
4 conducted using SPSS (26).

## 6 **RESULTS**

### 8 **Respondent characteristics**

9  
10 A total of 1054 respondents completed the full survey, while a further 296 completed over  
11 50% of the questions and were included in the descriptive analysis but excluded from  
12 regression analysis. See Figure 1 for a full breakdown on inclusions. Demographic  
13 information is provided in Table 1. The mean age was  $41.09 \pm 13.08$ , with 69.5% (733/1054)  
14 being female, 43.8% (462/1054) of north-west European ethnicity, while most had a tertiary  
15 education (90.7%, 956/1054) and were stranded in the European Region (EUR) (45.3%,  
16 608/1341) and were trying to return to the Western Pacific Region (WPR) (75.4%,  
17 1011/1341).  
18  
19

20  
21  
22  
23  
24 Approximately 25% (303/1214) reported a historical or current COVID-19 infection, and of  
25 those the majority rated a 'mild' symptom severity (85.1%, 258/303). Respondents' mean  
26 overall level of perceived risk of contracting COVID-19 while abroad (on a scale of 1 to 10,  
27 where 1 = no risk, and 10=high risk) was 6.64 ( $n=1182$ ,  $SD=2.85$ ), with 24.7% (300/1214)  
28 rating the perceived risk while abroad at high risk (10). Comparatively, the overall mean  
29 level of perceived risk of contracting COVID-19 in the country where respondents had  
30 returned to was 4.11 ( $n=673$ ,  $SD=2.81$ ), with only 8.02% (54/673) rating the perceived risk at  
31 'home' as high risk.  
32  
33

### 34 **Travel experiences**

35  
36  
37  
38  
39 Initially 44% (550/1245) of respondents had left their country of residence to take up long-  
40 term employment, with over 60% stranded abroad for more than 5 months (63.7%,  
41 854/1341), with 28.7% (357/1245) either having had booked a flight or awaiting flight  
42 availability. Refer to table 2 for a full breakdown of respondent's experiences and current  
43 situation while stranded abroad.  
44  
45

### 46 **Mental wellbeing**

47  
48  
49  
50 Figure 2 presents the respondents ( $n=1133$ ) self-reported depression, anxiety, stress symptom  
51 severity score categories based on the DASS-21 tool. Of the respondents, 64.4% scored  
52 moderate to extremely severe depression symptoms ( $\bar{x}=18.87$ ,  $SD=11.62$ ), 41.7% scoring  
53 moderate to extremely severe anxiety symptoms ( $\bar{x}=10.91$ ,  $SD=9.47$ ), and 58.1% scoring  
54 between moderate to extremely severe stress symptoms ( $\bar{x}=21.48$ ,  $SD=10.52$ ).  
55  
56

57  
58  
59  
60 Many reported no access to crisis support or mental health services while abroad (63.5%,  
719/1133), and of those that did have access, only 37.9% (157/414) utilised the services. A



total of 12% (133/1112) experienced a period of homelessness while stranded abroad. Of those that were willing to share their experiences ( $n = 94/133$ ), commonly noted situations included living in temporary accommodation (32%, 30/94), sleeping on the couch or in a spare bedroom at a friend/family members place (32%, 30/94), and staying in emergency accommodation (including homeless shelters) (17%, 16/94). Less common experiences were those that lived on the street, trains, at the airport, in cars, in tents (<20%, 18/94). Two respondents disclosed having experienced a sexual assault while staying at a homeless shelter.

### **Financial wellbeing**

Financial distress was reported in 64.2% (723/1127), and 38.4% (433/1127) reported a change in employment. A breakdown of ways in which respondents sought to address financial distress along with employment changes and current employment situation are reported in Table 3.

### **Factors associated with and predictors of depression, anxiety, and stress**

Chi square analyses revealed significant associations between respondents DASS categories and their age, time stranded abroad, financial stress, homelessness, employment change, and their perceived risk of contracting COVID-19 (on a scale from 1 to 10, with 1-3 being considered low risk, 4-6 moderate risk and 7-10 high risk). No associations were found between DASS severity categories and having access to crisis support or mental health services (see Supplementary file 1). For depression, logistic regression identified financial stress, employment change, and a high perceived risk of contracting COVID-19 as predictors of moderate to extremely severe depression. Overall, the model correctly discriminated 67.7% of cases and Nagelkerke  $R^2$  indicated a 14% variation of depression explained by the model. For anxiety, logistic regression identified financial stress, employment change, and a high perceived risk of contracting COVID-19, as predictors of moderate to extremely severe anxiety. Overall, the model correctly discriminated 64.5% of cases and Nagelkerke  $R^2$  indicated a 13% variation of anxiety explained by the model. Finally for stress, logistic regression identified financial stress, employment change, and a high perceived risk of contracting COVID-19, as predictors of moderate to extremely severe stress. Overall, the model showed goodness of fit to the data ( $\chi^2(14) = 95.772, p < .001$ ), correctly discriminated 63.6% of cases and Nagelkerke  $R^2$  indicated a 13% variation of stress explained by the model. Table 4 presents results of the multivariable logistic regression. Being 30 years or older and stranded for 2 months or less was associated with decreased odds of moderate to extremely severe depression, anxiety, and stress.

## DISCUSSION

This study evaluated the psychological and financial distress of individuals stranded abroad during the COVID-19 pandemic and highlights the importance of providing additional support to this vulnerable group in future public health events. Amongst our respondents we found that over half had been stranded for longer than five months, with the majority having more than one flight cancellation or change. Our results confirm sentiments shared on social media by people stranded abroad, that reflect experiences of having no financial support, depression, homelessness and a general feeling of abandonment by their governments (8-10). Given the continued flight changes and delays (incurring additional costs) in the population of individuals stranded abroad, along with changes to employment, it is perhaps not surprising that we documented a high level of financial distress (64.2%), employment changes (38.4%), and experiences of homelessness (12%). Our findings align with results from non-travel related COVID studies which have indicated an increase in financial distress (17), increases in experiences of homelessness (27) and growing employment changes (28) during the pandemic. Comparatively, we reported much higher findings compared to a survey of the general population conducted within the first 6 months of the pandemic, finding that 30% of Australians were financially stressed because of the pandemic (29). This difference could be explained by those stranded abroad having different elements of uncertainty (additional flight costs, additional rent, and expenses due to the length of time stranded, and uncertain employment) compared to the general population.

Based on our findings, we recommend policymakers prioritise increasing the availability of financial assistance in the form of government grants or loans for living and flight costs incurred due to being stranded abroad, or alternatively providing the option to access social support while abroad if an individual would have been eligible had they not been abroad. Furthermore, considering the proportion of people who reported experiencing homelessness, the cases of sexual assault within homeless shelters, and previous research indicating a lack of emergency accommodation options for citizens abroad during COVID-19 (7), it is recommended that policymakers provide a solution to this issue. Whether it be through financial assistance or an emergency accommodation program similar to those that the French and Spanish governments introduced, where citizens residing permanently abroad have the option of offering accommodation or a room to citizens who are stranded, governments have to prioritise a solution and effectively communicate this support package (7).

1  
2  
3 At this stage in the pandemic, it is almost indisputable that COVID-19 has had a  
4 psychological impact on populations around the world, whether it be healthcare workers,  
5 people in lockdown or quarantine, or specific countries or communities, the stressors were all  
6 encompassing (11-14, 30, 31). Our findings reflect much higher incidence of moderate to  
7 extremely severe depression (64.4%), anxiety (41.7%), and stress (58.1%), compared to  
8 domestic populations around the world (25). Previous research show lower DAS severity  
9 scores (25), especially when comparing our results to studies exploring psychological  
10 impacts of COVID-19 on healthcare workers (32, 33) and domestic students (34, 35). One  
11 study observing the psychological correlates of COVID-19 on the general population in  
12 Austria, reported drastically lower scores of depression (21.6%), anxiety (28.6%) and stress  
13 (28%), and found that 'frequent contact with family or friends' was shown to be a protective  
14 factor (25).

15  
16 However, research on international students during COVID-19, have reflected high DASS  
17 severity, aligned with our study findings (20, 36). Possible reasons for these differences could  
18 be the parallels between international student experiences and those stranded, both living  
19 abroad and arguably away from their immediate social support network (family). A range of  
20 factors contributed to the psychological wellbeing of individuals in this study. Having  
21 financial stress, an employment change and having a high perceived risk of contracting  
22 COVID-19 were all associated with predicting moderate to extremely severe depression,  
23 anxiety, and stress. Additionally, the length of time stranded was also associated with higher  
24 severity of DASS, with >5months for depression and stress, and 3-5months for anxiety.  
25 These results are not surprising considering the literature shows that many stressors, like  
26 financial distress, fear of COVID-19 infection, loneliness, inadequate information, and  
27 employment issues have all presented as predictors of poor mental health and in the case of  
28 financial distress, can go further than predicting depression to suicidal thoughts and  
29 behaviours (31, 37). Unique to this study, however, is the finding that the longer an  
30 individual is stranded abroad the more likely they are to present with moderate to severe DAS  
31 symptoms.

32  
33 Interestingly, of the age categories in this investigation, respondents >69yrs had lower scores  
34 of depression, anxiety, and stress, inconsistent with research conducted in Spain and Canada  
35 suggesting increased DASS scores in elders (38, 39). This, as was noted by the authors of the  
36 Sightlines Project (40), may be due to older people being more financial secure than other  
37 age groups. It may also reflect that older people were less likely to have insecurity associated  
38 with employment or have younger dependent family members to provide direct care to. This  
39  
40  
41  
42  
43  
44  
45  
46  
47  
48  
49  
50  
51  
52  
53  
54  
55  
56  
57  
58  
59  
60

1  
2  
3 may have provided more opportunity for flexibility in their travel plans. These results  
4 reflecting high severity of DASS in those stranded abroad, provides both current and future  
5 direction for policymakers. We recommend policymakers provide adequate mental health  
6 interventions be available to those stranded abroad, either online or face-to-face where  
7 possible through a local consulate.  
8  
9

10  
11 It is hard to deny that people have been deprived of the ability to return to their country of  
12 citizenship or permanent residence, as shown by the 63.3% of our respondents being stranded  
13 abroad for longer than 5 months. Addressing public health threats from a health security  
14 perspective has already increased fears that it legitimises government actions, potentially  
15 undermining personal sovereignty, and impeding human rights (41). A commonly cited  
16 human rights treaty in response to imposed restrictions is Article 12 (42) of the International  
17 Covenant on Civil and Political Rights (ICCPR), a treaty with 74 signatories and 173 parties  
18 which states that “No one shall be arbitrarily deprived of the right to enter his own country”  
19 (42).  
20  
21

22  
23 The most frequently mentioned human rights breach was the Australian government  
24 imposing not only a complete ban on incoming flights from India, but potential criminal  
25 penalties to Australian citizens or permanent residents of up to five years imprisonment,  
26 and/or fines up to \$66000 (AUD), for attempting to enter Australia from India through a third  
27 country (43). Mostly in reference to breaching Article 12 (42) of the International Covenant  
28 on Civil and Political Rights (ICCPR), this ban, implemented under the *Biosecurity Act*  
29 *2015(44)*, between April and May 2021, has been labelled a ‘racist rights breach’ (45), with  
30 the Australian Human Rights Commission approaching the federal government directly with  
31 their concerns (43). Due to impacts of ongoing border closures and individuals struggling to  
32 return home, as further highlighted in this study where the majority of respondents were  
33 trying to return to, Australian citizens stranded abroad submitted a human rights complaint to  
34 the United Nations Human Rights Committee under the ICCPR, with the UN Human Rights  
35 Committee already successfully requesting to the Australian Government the prompt  
36 repatriation of two Australians in April 2021 (46).  
37  
38

39  
40 Due to the results of our study alongside the probable human rights breaches, we recommend  
41 policymakers seriously reconsider current and future restriction of movement of citizens and  
42 permanent residents returning home who are at risk of financial distress and severe DASS the  
43 longer that they are stranded for. With international borders reopening around the world,  
44 some being restricted for nearly 20 months, it is critical to not only look at the impact of  
45 travel restrictions from the perspective of reducing infectious disease importations, but also  
46  
47  
48  
49  
50  
51  
52  
53  
54  
55  
56  
57  
58  
59  
60

1  
2  
3 from the perspective of those stranded abroad, who were arguably one of the most impacted  
4 by them. In doing so, policymakers can determine where further support is needed in future  
5 emergency situations resulting in people stranded abroad.  
6  
7

### 8 **Limitations**

9  
10 This work is not without limitations. Firstly, like other cross sectional survey studies, it lacks  
11 a longitudinal follow up on respondents. Secondly, the self-report questionnaire for  
12 psychological symptoms raises possible selection bias and subjectivity, however our sample  
13 size being large, and the addition of an optional 'do not recall' response should mitigate  
14 certain bias. Thirdly, we were unable to capture the specific immigration status of those  
15 returning, i.e., whether they were citizens, permanent residents, or short-term visa holders.  
16 Finally, we did not examine pre-existing mental health conditions which could prove to be a  
17 confounding factor, and there was an over representation of women, those returning to the  
18 western pacific region and respondents with an academic background, possible due to  
19 convenience sampling issues and survey distribution originating in Australia, which may not  
20 fully represent the population of people who were stranded abroad. The study did not collect  
21 information on treatment of anxiety, stress, or depression, nor did we collect data on suicide  
22 ideation. Notwithstanding the previously mentioned limitations, findings from this study  
23 provide insights not previously reported into the psychological and financial impacts and  
24 support needed for individuals stranded abroad due to COVID-19 travel restrictions. These  
25 insights will be valuable for policy makers as they design and deliver support programs in  
26 response and prepare for future events.  
27  
28  
29  
30  
31  
32  
33  
34  
35  
36  
37  
38

### 39 **Conclusion**

40  
41 This research suggests that being stranded abroad during COVID-19 may lead to not only an  
42 increase in financial stress, but quite severe depression, anxiety, and stress. Our findings  
43 show that being young, stranded abroad for longer, having a high perception of infection risk,  
44 experiencing employment changes and financial stress are all associated with increased  
45 severity of depression, anxiety, and stress. Respondents reported that lack of mental and  
46 social health support while stranded. This indicates that there are gaps in services available  
47 for this vulnerable population or lack of communication as to how to access them; both issues  
48 that need to be resolved.  
49  
50  
51  
52  
53  
54  
55  
56  
57  
58  
59  
60

## ABBREVIATIONS

**AFR:** African region

**AMR:** Region of the Americas

**COVID-19:** Coronavirus disease of 2019

**DAS:** Depression, anxiety, and stress

**DASS-21:** The 21-item depression, anxiety, and stress scale

**EMR:** Eastern Mediterranean region

**EUR:** European region

**SEAR:** South-East Asian region

**WPR:** Western Pacific region

## REFERENCES

1. Chinazzi M, Davis JT, Ajelli M, Gioannini C, Litvinova M, Merler S, et al. The effect of travel restrictions on the spread of the 2019 novel coronavirus (COVID-19) outbreak. *Science*. 2020;368(6489):395-400.
2. Seyfi S, Hall CM, Shabani B. COVID-19 and international travel restrictions: the geopolitics of health and tourism. *Tourism Geographies*. 2020:1-17.
3. von Tigerstrom BJ, Halabi SF, Wilson KR. The International Health Regulations (2005) and the re-establishment of international travel amidst the COVID-19 pandemic. *Journal of Travel Medicine*. 2020;27(8).
4. Ministry of Foreign Affairs to complete repatriation of Spaniards on close to 50 flights: Ministerio de Asuntos Exteriores; 2020 [Available from: [http://www.exteriores.gob.es/Portal/en/SalaDePrensa/NotasdePrensa/Paginas/2020\\_NOTAS\\_P/20200430\\_NOTA065.aspx](http://www.exteriores.gob.es/Portal/en/SalaDePrensa/NotasdePrensa/Paginas/2020_NOTAS_P/20200430_NOTA065.aspx)].
5. Keynote Speech by Foreign Minister MOTEGI at the 2ND TOKYO GLOBAL DIALOGUE "Japan's Foreign Policy towards the post-COVID-19 world": Ministry of Foreign Affairs of Japan; 2021 [Available from: [https://www.mofa.go.jp/fp/pp/page3e\\_001109.html](https://www.mofa.go.jp/fp/pp/page3e_001109.html)].
6. Hale T, Angrist N, Goldszmidt R, Kira B, Petherick A, Phillips T, et al. A global panel database of pandemic policies (Oxford COVID-19 Government Response Tracker). *Nature Human Behaviour*. 2021;5(4):529-38.
7. McDermid P, Craig A, Sheel M, Seale H. How have governments supported citizens stranded abroad due to COVID-19 travel restrictions? A comparative analysis of the financial and health support in eleven countries. *BMC Infectious Diseases*. 2022;22(1):161.
8. Devlin M. "It was the worst possible situation": Canadians stuck abroad months into pandemic. *DH News*. 2020.
9. Fuller K. Australians stranded overseas 'betrayed', says a man telling of months of injury, illness and homelessness. *ABC Illawarra*. 2020.
10. Capper S. Abandoned overseas: The mental health toll of Australia's closed borders on its citizens. *SBS News*. 2021.
11. Burke T, Berry A, Taylor LK, Stafford O, Murphy E, Shevlin M, et al. Increased Psychological Distress during COVID-19 and Quarantine in Ireland: A National Survey. *J Clin Med*. 2020;9(11):3481.
12. Dawel A, Shou Y, Smithson M, Cherbuin N, Banfield M, Calear AL, et al. The Effect of COVID-19 on Mental Health and Wellbeing in a Representative Sample of Australian Adults. *Frontiers in Psychiatry*. 2020;11(1026).
13. Kalok A, Sharip S, Abdul Hafizz AM, Zainuddin ZM, Shafiee MN. The Psychological Impact of Movement Restriction during the COVID-19 Outbreak on Clinical Undergraduates: A Cross-Sectional Study. *Int J Environ Res Public Health*. 2020;17(22).
14. Newby JM, O'Moore K, Tang S, Christensen H, Faasse K. Acute mental health responses during the COVID-19 pandemic in Australia. *PLOS ONE*. 2020;15(7):e0236562.
15. O'Sullivan D, Rahamathulla M, Pawar M. The Impact and Implications of COVID-19: An Australian Perspective. *The International Journal of Community and Social Development*. 2020;2(2):134-51.
16. Rajkumar RP. COVID-19 and mental health: A review of the existing literature. *Asian J Psychiatr*. 2020;52:102066-.
17. Robillard R, Saad M, Edwards J, Solomonova E, Pennestri M-H, Daros A, et al. Social, financial and psychological stress during an emerging pandemic: observations from a population survey in the acute phase of COVID-19. *BMJ Open*. 2020;10(12):e043805.

18. Sher L. The impact of the COVID-19 pandemic on suicide rates. *Qjm*. 2020;113(10):707-12.
19. Stevenson C, Wakefield JRH. Financial distress and suicidal behaviour during COVID-19: Family identification attenuates the negative relationship between COVID-related financial distress and mental ill-health. *Journal of Health Psychology*.0(0):13591053211014597.
20. Behisi MA, Altaweel HM, Gassas RF, Aldehaiman M, Alkhamees AA. COVID-19 Pandemic and Mental Health Status of Saudi Citizens Living Abroad. *International journal of environmental research and public health*. 2021;18(15).
21. Qualtrics. Qualtrics. Provo, Utah, USA2005.
22. Australian Standard Classification of Cultural and Ethnic Groups (ASCCEG) (2016).
23. Alderslade R, Bellman M, Rawson N, al. e. The national childhood encephalopathy study: a report on 1000 cases of serious neurologic disorders in infants and young children from the NCES research team. In: Whooping cough: reports from the Committee on the Safety of Medicines and the Joint Committee on Vaccination and Immunisation. Department of Health & Social Security, HMSO; 1981 1981. Report No.: 1-184.
24. Lovibond PF, Lovibond SH. Manual for the Depression Anxiety Stress Scales. Sydney: Psychology Foundation. 1995(2nd. Ed.).
25. Traunmüller C, Stefitz R, Gaisbachgrabner K, Schwerdtfeger A. Psychological correlates of COVID-19 pandemic in the Austrian population. *BMC Public Health*. 2020;20(1):1395.
26. IBM SPSS Statistics for Mac. 28 ed. Armonk, NY: IBM Corp.; 2021.
27. Kunz. RSaM. COVID-19 IMPACTS US ALL: Ensuring the safety and well-being of people on temporary visas during COVID-19.; 2020.
28. Tušl M, Brauchli R, Kerksieck P, Bauer GF. Impact of the COVID-19 crisis on work and private life, mental well-being and self-rated health in German and Swiss employees: a cross-sectional online survey. *BMC Public Health*. 2021;21(1):741.
29. Taking the pulse of the nation: Melbourne Institute's Survey of the Impact of COVID-19 in Australia. The University of Melbourne; 2020.
30. Xiong J, Lipsitz O, Nasri F, Lui LMW, Gill H, Phan L, et al. Impact of COVID-19 pandemic on mental health in the general population: A systematic review. *J Affect Disord*. 2020;277:55-64.
31. Stevenson C, Wakefield JRH. Financial distress and suicidal behaviour during COVID-19: Family identification attenuates the negative relationship between COVID-related financial distress and mental ill-health. *Journal of Health Psychology*. 2021;26(14):2665-75.
32. Hammond NE, Crowe L, Abbenbroek B, Elliott R, Tian DH, Donaldson LH, et al. Impact of the coronavirus disease 2019 pandemic on critical care healthcare workers' depression, anxiety, and stress levels. *Aust Crit Care*. 2021;34(2):146-54.
33. Lenzo V, Quattropani MC, Sardella A, Martino G, Bonanno GA. Depression, Anxiety, and Stress Among Healthcare Workers During the COVID-19 Outbreak and Relationships With Expressive Flexibility and Context Sensitivity. *Frontiers in Psychology*. 2021;12(348).
34. Juchnowicz D, Baj J, Forma A, Karakuła K, Sitarz E, Bogucki J, et al. The Outbreak of SARS-CoV-2 Pandemic and the Well-Being of Polish Students: The Risk Factors of the Emotional Distress during COVID-19 Lockdown. *J Clin Med*. 2021;10(5):944.
35. Vala NH, Vachhani MV, Sorani AM. Study of anxiety, stress, and depression level among medical students during COVID-19 pandemic phase in Jamnagar city. *National Journal of Physiology, Pharmacy and Pharmacology*. 2020;10(12):1043-5.



- 1  
2  
3 36. Alam MD, Lu J, Ni L, Hu S, Xu Y. Psychological Outcomes and Associated Factors  
4 Among the International Students Living in China During the COVID-19 Pandemic.  
5 *Frontiers in Psychiatry*. 2021;12(1372).  
6  
7 37. Serafini G, Parmigiani B, Amerio A, Aguglia A, Sher L, Amore M. The  
8 psychological impact of COVID-19 on the mental health in the general population. *QJM: An*  
9 *International Journal of Medicine*. 2020;113(8):531-7.  
10  
11 38. Ozamiz-Etxebarria N, Dosil-Santamaria M, Picaza-Gorrochategui M, Idoiaga-  
12 Mondragon N. Stress, anxiety, and depression levels in the initial stage of the COVID-19  
13 outbreak in a population sample in the northern Spain. *Cad Saude Publica*.  
14 2020;36(4):e00054020.  
15  
16 39. Nwachukwu I, Nkire N, Shalaby R, Hrabok M, Vuong W, Gusnowski A, et al.  
17 COVID-19 Pandemic: Age-Related Differences in Measures of Stress, Anxiety and  
18 Depression in Canada. *Int J Environ Res Public Health*. 2020;17(17).  
19  
20 40. The Sightlines Project: seeing our way to living long & living well in 21st century  
21 America: Stanford Center on Longevity; 2016 [Available from:  
22 [https://www.soa.org/globalassets/assets/files/research/projects/research-2016-sightlines-](https://www.soa.org/globalassets/assets/files/research/projects/research-2016-sightlines-report.pdf)  
23 [report.pdf](https://www.soa.org/globalassets/assets/files/research/projects/research-2016-sightlines-report.pdf).  
24  
25 41. Harrington J. Indicators, security and sovereignty during COVID-19 in the Global  
26 South. *International Journal of Law in Context*. 2021;17(2):249-60.  
27  
28 42. International Covenant on Civil and Political Rights (16 December 1966).  
29  
30 43. Statement on travel ban and sanctions on Australians travelling from India. Australian  
31 Human Rights Commission. 2021.  
32  
33 44. Biosecurity Act Sect. 477 (2015).  
34  
35 45. Australia's India ban criticised as 'racist' rights breach. *BBC News*. 2021.  
36  
37 46. Hicks E. A Right to Come Home? Repatriation Rights & Policy in Australia.  
38 Melbourne: The Univeristy of Melbourne; 2021.  
39  
40  
41  
42  
43  
44  
45  
46  
47  
48  
49  
50  
51  
52  
53  
54  
55  
56  
57  
58  
59  
60

## DECLARATIONS

### Ethics approval and consent to participate

Ethical approval for this study was granted by the UNSW Human Research Ethics Committee (#210418). All respondents were anonymous and indicated their consent to participate.

### Competing interests

The authors declare that they have no competing interests.

### Contribution statement

PM conducted data collection, data analysis, manuscript writing and contributed to study design. AC, MS and HS conceived study design, interpretation of the data and were involved with manuscript writing and had final oversight. KB supported the statistical analysis of the data and ST supported the interpretation and write up of the findings. All authors read and approved the final manuscript.

### Funding

Not applicable

### Data sharing

The data used in this study is available upon request from the authors.

### Supplementary information

Supplementary file 1: Associations between participant factors and levels of depression, anxiety, and stress

### Figure Legend

Figure 1. Flowchart of participant inclusion

Figure 2. Depression, anxiety, and stress categories of citizens stranded abroad during COVID-19 (% of sample)

**Table 1. Characteristics of respondents stranded during COVID-19**

| Variables                                   | <i>n</i>      | %    |
|---------------------------------------------|---------------|------|
| <b>Sex recorded at birth</b>                | <b>(1054)</b> |      |
| Female                                      | 733           | 69.5 |
| Male                                        | 308           | 29.2 |
| Another term                                | 2             | .2   |
| Prefer not to say                           | 11            | .8   |
| <b>Gender</b>                               | <b>(1054)</b> |      |
| Female                                      | 732           | 69.4 |
| Male                                        | 304           | 28.8 |
| Another term                                | 5             | .5   |
| Prefer not to say                           | 13            | 1.2  |
| <b>Age</b>                                  | <b>(1054)</b> |      |
| 18-29                                       | 226           | 21.4 |
| 30-49                                       | 545           | 51.7 |
| 50-69                                       | 262           | 24.9 |
| 70+                                         | 21            | 1.1  |
| <b>Main language spoken at home</b>         | <b>(1054)</b> |      |
| English                                     | 940           | 89.2 |
| Other                                       | 83            | 7.9  |
| Spanish                                     | 11            | 1.0  |
| Urdu                                        | 7             | .7   |
| French                                      | 7             | .7   |
| Chinese                                     | 6             | .6   |
| <b>Highest level of education</b>           | <b>(1054)</b> |      |
| Tertiary education                          | 956           | 90.7 |
| Secondary education                         | 91            | 8.6  |
| Primary education                           | 5             | .5   |
| No formal education                         | 2             | .2   |
| <b>Current employment situation</b>         | <b>(1250)</b> |      |
| Working now for pay                         | 620           | 56.0 |
| Unemployed                                  | 240           | 21.7 |
| Other                                       | 95            | 8.6  |
| Student                                     | 88            | 7.9  |
| Live with parents/guardians                 | 86            | 8.0  |
| Stay at home parent/caregiver               | 84            | 7.6  |
| Retired                                     | 82            | 7.4  |
| Volunteer                                   | 23            | 2.1  |
| Unable to work due to disability or illness | 18            | 1.6  |
| <b>Ethnicity</b>                            | <b>(1054)</b> |      |
| North-West European                         | 462           | 43.8 |
| Oceanian                                    | 242           | 23   |
| Unsure                                      | 134           | 12.7 |

1  
2  
3  
4  
5  
6  
7  
8  
9  
10  
11  
12  
13  
14  
15  
16  
17  
18  
19  
20  
21  
22  
23  
24  
25  
26  
27  
28  
29  
30  
31  
32  
33  
34  
35  
36  
37  
38  
39  
40  
41  
42  
43  
44  
45  
46  
47  
48  
49  
50  
51  
52  
53  
54  
55  
56  
57  
58  
59  
60

|                                                        |               |      |
|--------------------------------------------------------|---------------|------|
| South-East Asian                                       | 70            | 6.6  |
| Southern and Eastern European                          | 68            | 6.5  |
| Southern and Central Asian                             | 27            | 2.6  |
| People of the Americas                                 | 26            | 2.5  |
| North-East Asian                                       | 11            | 1.0  |
| North African and Middle Eastern                       | 10            | .9   |
| Sub-Saharan African                                    | 4             | .4   |
| <b>Usual country of residence</b>                      | <b>(1341)</b> |      |
| WPR                                                    | 1011          | 75.4 |
| EUR                                                    | 176           | 13.1 |
| AMR                                                    | 93            | 6.9  |
| SEAR                                                   | 29            | 2.2  |
| EMR                                                    | 25            | 1.9  |
| AFR                                                    | 7             | .5   |
| <b>Country where stranded</b>                          | <b>(1341)</b> |      |
| EUR                                                    | 608           | 45.3 |
| WPR                                                    | 311           | 23.2 |
| AMR                                                    | 238           | 17.7 |
| EMR                                                    | 79            | 5.9  |
| SEAR                                                   | 78            | 5.8  |
| AFR                                                    | 27            | 2.0  |
| <b>Initial reason for leaving country of residence</b> | <b>(1245)</b> |      |
| Long-term employment                                   | 550           | 44.2 |
| Other                                                  | 272           | 21.8 |
| Visiting family or friends                             | 260           | 20.9 |
| Travel to study overseas                               | 72            | 5.8  |
| Travel for business                                    | 54            | 4.3  |
| Tourism                                                | 37            | 3.0  |

AFR, African Region; AMR, Region of the Americas; SEAR, South-East Asian Region; EUR, European Region; EMR, Eastern Mediterranean Region; WPR, Western Pacific Region

**Table 2. Travel experiences of respondents stranded abroad during COVID-19**

| <b>Variables</b>                                              | <b><i>n</i></b> | <b>%</b> |
|---------------------------------------------------------------|-----------------|----------|
| <b>Time stranded abroad</b>                                   | <b>(1341)</b>   |          |
| <1 month                                                      | 89              | 6.6      |
| 1-2 months                                                    | 91              | 6.8      |
| 2-3 months                                                    | 128             | 9.5      |
| 3-5 months                                                    | 98              | 7.3      |
| >5 months                                                     | 853             | 63.6     |
| No wait                                                       | 82              | 6.1      |
| <b>Number of flight cancellation/changes</b>                  | <b>(1245)</b>   |          |
| Not applicable                                                | 319             | 25.6     |
| 0 changes                                                     | 152             | 12.2     |
| 1 cancellation or delay                                       | 245             | 19.7     |
| 2 cancellation or delay                                       | 196             | 15.7     |
| 3 cancellation or delay                                       | 147             | 11.8     |
| 4 cancellation or delay                                       | 65              | 5.2      |
| 5 cancellation or delay                                       | 31              | 2.5      |
| >5 cancellations or delays                                    | 90              | 7.2      |
| <b>Experiences while trying to return</b>                     | <b>(1245)</b>   |          |
| Limit on the number of people who could enter the country     | 740             | 59.4     |
| Inability to book a flight                                    | 671             | 53.9     |
| Flight cancellation                                           | 660             | 15.3     |
| COVID-19 testing requirements prior to flying                 | 281             | 22.6     |
| Other                                                         | 229             | 18.4     |
| Separation from family/companion                              | 172             | 13.8     |
| Visa issues                                                   | 147             | 11.8     |
| Delays during transit                                         | 44              | 3.5      |
| <b>Current situation</b>                                      | <b>(1245)</b>   |          |
| Booked a flight/waiting for flight availability               | 357             | 26.6     |
| Unable to return but have decided to stay                     | 352             | 26.2     |
| Returned to country of residence after delays                 | 323             | 24.1     |
| Other                                                         | 295             | 22       |
| Returned to country of residence after being stuck in transit | 14              | 1        |

**Table 3. Financial and employment characteristics of respondents stranded abroad during COVID-19**

| <b>Variables</b>                                                                                     | <b><i>n</i></b>          | <b>%</b>                         |
|------------------------------------------------------------------------------------------------------|--------------------------|----------------------------------|
| <b>Addressing financial stress</b>                                                                   | <b>(n/836 responses)</b> | <b>% of respondents (n=1127)</b> |
| Received financial support from family or friends                                                    | 354                      | 31.4                             |
| Other                                                                                                | 201                      | 17.8                             |
| Borrowed money from a bank                                                                           | 58                       | 5.1                              |
| Personal savings                                                                                     | 47                       | 4.2                              |
| Accessed emergency financial support from the organisation or services in the country you were stuck | 43                       | 3.8                              |
| Received financial support from your employer                                                        | 39                       | 3.5                              |
| Applied but did not receive a government loan                                                        | 39                       | 3.5                              |
| Early withdrawal of superannuation                                                                   | 27                       | 2.4                              |
| Received a government loan to cover your living costs                                                | 14                       | 1.2                              |
| Received a government loan to cover the cost of a flight home                                        | 8                        | 0.7                              |
| Received financial support from an insurance company                                                 | 6                        | 0.5                              |
| <b>Current employment situation</b>                                                                  | <b>(1250)</b>            |                                  |
| Working now for pay                                                                                  | 620                      | 56.0                             |
| Unemployed                                                                                           | 240                      | 21.7                             |
| Retired                                                                                              | 82                       | 7.4                              |
| Student                                                                                              | 88                       | 7.9                              |
| Unable to work due to disability or illness                                                          | 18                       | 1.6                              |
| Volunteer                                                                                            | 23                       | 2.1                              |
| Stay at home parent/caregiver                                                                        | 84                       | 7.6                              |
| Other                                                                                                | 95                       | 8.6                              |
| <b>Employment change while abroad</b>                                                                | <b>(n/717 responses)</b> | <b>% of respondents (n=1127)</b> |
| Worked remotely                                                                                      | 123                      | 10.9                             |
| Lost job                                                                                             | 119                      | 10.6                             |
| Other                                                                                                | 113                      | 10.0                             |
| Resigned                                                                                             | 77                       | 6.8                              |
| Contract not renewed                                                                                 | 69                       | 6.1                              |
| Reduction of hours                                                                                   | 63                       | 5.6                              |
| Stood down, not working for pay, but not fired                                                       | 45                       | 4.0                              |
| Pay cut                                                                                              | 32                       | 2.8                              |
| Back in paid work                                                                                    | 31                       | 2.8                              |
| Not working but receiving government assistance                                                      | 27                       | 2.4                              |
| Increase in hours                                                                                    | 18                       | 1.6                              |

**Table 3. Financial and employment characteristics of respondents stranded abroad during COVID-19**

| <b>Variables</b>                                                                                     | <b><i>n</i></b>          | <b>%</b>                         |
|------------------------------------------------------------------------------------------------------|--------------------------|----------------------------------|
| <b>Addressing financial stress</b>                                                                   | <b>(n/836 responses)</b> | <b>% of respondents (n=1127)</b> |
| Received financial support from family or friends                                                    | 354                      | 31.4                             |
| Other                                                                                                | 201                      | 17.8                             |
| Borrowed money from a bank                                                                           | 58                       | 5.1                              |
| Personal savings                                                                                     | 47                       | 4.2                              |
| Accessed emergency financial support from the organisation or services in the country you were stuck | 43                       | 3.8                              |
| Received financial support from your employer                                                        | 39                       | 3.5                              |
| Applied but did not receive a government loan                                                        | 39                       | 3.5                              |
| Early withdrawal of superannuation                                                                   | 27                       | 2.4                              |
| Received a government loan to cover your living costs                                                | 14                       | 1.2                              |
| Received a government loan to cover the cost of a flight home                                        | 8                        | 0.7                              |
| Received financial support from an insurance company                                                 | 6                        | 0.5                              |
| <b>Current employment situation</b>                                                                  | <b>(1250)</b>            |                                  |
| Working now for pay                                                                                  | 620                      | 56.0                             |
| Unemployed                                                                                           | 240                      | 21.7                             |
| Retired                                                                                              | 82                       | 7.4                              |
| Student                                                                                              | 88                       | 7.9                              |
| Unable to work due to disability or illness                                                          | 18                       | 1.6                              |
| Volunteer                                                                                            | 23                       | 2.1                              |
| Stay at home parent/caregiver                                                                        | 84                       | 7.6                              |
| Other                                                                                                | 95                       | 8.6                              |
| <b>Employment change while abroad</b>                                                                | <b>(n/717 responses)</b> | <b>% of respondents (n=1127)</b> |
| Worked remotely                                                                                      | 123                      | 10.9                             |
| Lost job                                                                                             | 119                      | 10.6                             |
| Other                                                                                                | 113                      | 10.0                             |
| Resigned                                                                                             | 77                       | 6.8                              |
| Contract not renewed                                                                                 | 69                       | 6.1                              |
| Reduction of hours                                                                                   | 63                       | 5.6                              |
| Stood down, not working for pay, but not fired                                                       | 45                       | 4.0                              |
| Pay cut                                                                                              | 32                       | 2.8                              |
| Back in paid work                                                                                    | 31                       | 2.8                              |
| Not working but receiving government assistance                                                      | 27                       | 2.4                              |
| Increase in hours                                                                                    | 18                       | 1.6                              |

**Table 4. Predictors of moderate to extremely severe depression, anxiety, and stress in respondents stranded abroad during COVID-19 (n=956)**

| Variables                         | Depression |         |                 | Anxiety     |         |                 | Stress |                 |             |       |       |                 |
|-----------------------------------|------------|---------|-----------------|-------------|---------|-----------------|--------|-----------------|-------------|-------|-------|-----------------|
|                                   | OR         | 95% C.I | <i>p</i>        | OR          | 95% C.I | <i>p</i>        | OR     | 95% C.I         | <i>p</i>    |       |       |                 |
| <b>Age (yrs)</b>                  |            |         | <b>.005</b>     |             |         | <b>.030</b>     |        |                 | <b>.007</b> |       |       |                 |
| 18-29*                            |            |         |                 |             |         |                 |        |                 |             |       |       |                 |
| 30-49                             | .535       | .366    | .780            | .646        | .461    | .906            | .644   | .452            | .917        |       |       |                 |
| 50-69                             | .542       | .350    | .839            | .563        | .375    | .845            | .579   | .383            | .873        |       |       |                 |
| >69                               | .303       | .097    | .945            | .767        | .238    | 2.407           | .174   | .046            | .660        |       |       |                 |
| <b>Perceived risk of COVID-19</b> |            |         | <b>.026</b>     |             |         | <b>.003</b>     |        |                 | <b>.003</b> |       |       |                 |
| Not applicable                    | 1.595      | .384    | 6.627           | 1.608       | .433    | 5.840           | 2.317  | .573            | 9.368       |       |       |                 |
| Low risk*                         |            |         |                 |             |         |                 |        |                 |             |       |       |                 |
| Moderate risk                     | 1.099      | .723    | 1.672           | .700        | .456    | 1.076           | 1.042  | .691            | 1.571       |       |       |                 |
| High risk                         | 1.617      | 1.147   | 2.279           | 1.364       | .973    | 1.912           | 1.708  | 1.223           | 2.387       |       |       |                 |
| <b>Time stranded</b>              |            |         | <b>&lt;.001</b> |             |         | <b>&lt;.001</b> |        |                 | <b>.003</b> |       |       |                 |
| No wait                           | .893       | .399    | 1.997           | .697        | .308    | 1.579           | .936   | .421            | 2.082       |       |       |                 |
| <1 month                          | .357       | .174    | .735            | .332        | .149    | .738            | .459   | .224            | .940        |       |       |                 |
| 1-2 months                        | .396       | .201    | .781            | .420        | .208    | .849            | .475   | .242            | .932        |       |       |                 |
| 2-3 months                        | .587       | .313    | 1.101           | .571        | .303    | 1.078           | .702   | .377            | 1.308       |       |       |                 |
| 3-5 months*                       |            |         |                 |             |         |                 |        |                 |             |       |       |                 |
| >5 months                         | 1.281      | .770    | 2.129           | .984        | .601    | 1.610           | 1.062  | .647            | 1.743       |       |       |                 |
| <b>Homelessness, ref.no</b>       | 1.522      | .947    | 2.444           | .082        | 1.392   | .920            | 2.105  | .118            | 1.186       | .767  | 1.834 | .444            |
| <b>Employment Change, ref.no</b>  | 1.405      | 1.040   | 1.900           | <b>.027</b> | 1.569   | 1.177           | 2.092  | <b>.002</b>     | 1.564       | 1.171 | 2.090 | <b>.002</b>     |
| <b>Financial Stress, ref.no</b>   | 1.501      | 1.103   | 2.041           | <b>.010</b> | 1.728   | 1.268           | 2.345  | <b>&lt;0.00</b> | 1.682       | 1.246 | 2.269 | <b>&lt;.001</b> |

1

\*Reference variable

OR, log odds ratio controlling for other variables in the model; EXP (B), adjusted odds ratio; C.I, confidence interval; *p*, probability value (statistically significant <.05).



1  
2  
3  
4  
5  
6  
7  
8  
9  
10  
11  
12  
13  
14  
15  
16  
17  
18  
19  
20  
21  
22  
23  
24  
25  
26  
27  
28  
29  
30  
31  
32  
33  
34  
35  
36  
37  
38  
39  
40  
41  
42  
43  
44  
45  
46  
47  
48  
49  
50  
51  
52  
53  
54  
55  
56  
57  
58  
59  
60

For peer review only



Figure 1. Flowchart of participant inclusion

117x177mm (144 x 144 DPI)

1  
2  
3  
4  
5  
6  
7  
8  
9  
10  
11  
12  
13  
14  
15  
16  
17  
18  
19  
20  
21  
22  
23  
24  
25  
26  
27  
28  
29  
30  
31  
32  
33  
34  
35  
36  
37  
38  
39  
40  
41  
42  
43  
44  
45  
46  
47  
48  
49  
50  
51  
52  
53  
54  
55  
56  
57  
58  
59  
60



Figure 2. Depression, anxiety, and stress categories of citizens stranded abroad during COVID-19 (% of sample)

427x94mm (144 x 144 DPI)

## Supplementary file 1. Associations between participant factors and levels of depression, anxiety, and stress

| Variables                              | Depression  |             |             |             |                  | $\chi^2$ | df | p     |
|----------------------------------------|-------------|-------------|-------------|-------------|------------------|----------|----|-------|
|                                        | Normal      | Mild        | Moderate    | Severe      | Extremely Severe |          |    |       |
| <b>Age</b>                             |             |             |             |             |                  | 33.482   | 12 | <.001 |
| 18-29                                  | 38 (15.4%)  | 19 (14.4%)  | 55 (21.7%)  | 41 (25.8%)  | 73 (27.8%)       |          |    |       |
| 30-49                                  | 121 (49.2%) | 79 (59.8%)  | 131 (51.6%) | 77 (48.4%)  | 137 (52.1%)      |          |    |       |
| 50-69                                  | 76 (30.9%)  | 33 (25%)    | 64 (25.2%)  | 38 (23.9%)  | 51 (19.4%)       |          |    |       |
| 70+                                    | 11 (4.5%)   | 1 (0.8%)    | 4 (1.6%)    | 3 (1.9%)    | 2 (0.8%)         |          |    |       |
| <b>Time stranded abroad</b>            |             |             |             |             |                  | 82.982   | 20 | <.001 |
| No wait                                | 20 (7.8%)   | 4 (2.7%)    | 12 (4.4%)   | 6 (3.5%)    | 11 (3.9%)        |          |    |       |
| Up to 1 month                          | 32 (12.4%)  | 16 (11%)    | 14 (5.1%)   | 5 (2.9%)    | 7 (2.5%)         |          |    |       |
| 1-2 months                             | 32 (12.4%)  | 10 (6.8%)   | 23 (8.4%)   | 7 (4.1%)    | 8 (2.8%)         |          |    |       |
| 2-3 months                             | 32 (12.4%)  | 18 (12.3%)  | 22 (8%)     | 22 (12.8%)  | 23 (8.1%)        |          |    |       |
| 4-5 months                             | 21 (8.1%)   | 15 (10.3%)  | 22 (8%)     | 15 (8.7%)   | 21 (7.4%)        |          |    |       |
| 5+ months                              | 121 (46.9%) | 83 (56.8%)  | 181 (66.1%) | 117 (68%)   | 213 (75.3%)      |          |    |       |
| <b>Financial stress</b>                |             |             |             |             |                  | 35.123   | 4  | <.001 |
| Yes                                    | 140 (54.3%) | 85 (58.6%)  | 172 (63%)   | 109 (64.1%) | 218 (77.6%)      |          |    |       |
| No                                     | 118 (45.7%) | 60 (41.4%)  | 101 (37%)   | 61 (35.9%)  | 63 (22.4%)       |          |    |       |
| <b>Homelessness</b>                    |             |             |             |             |                  | 30.149   | 4  | <.001 |
| Yes                                    | 17 (6.6%)   | 16 (11.3%)  | 26 (9.7%)   | 16 (9.5%)   | 58 (20.9%)       |          |    |       |
| No                                     | 239 (93.4%) | 125 (88.7%) | 243 (90.3%) | 152 (90.5%) | 220 (79.1%)      |          |    |       |
| <b>Employment Change</b>               |             |             |             |             |                  | 22.648   | 4  | <.001 |
| Yes                                    | 89 (38.2%)  | 45 (34.9%)  | 107 (43.5%) | 74 (49%)    | 138 (55.9%)      |          |    |       |
| No                                     | 144 (61.8%) | 84 (65.1%)  | 139 (56.5%) | 77 (51%)    | 109 (44.1%)      |          |    |       |
| <b>Flight changes or cancellations</b> |             |             |             |             |                  | 36.694   | 24 | .029  |
| 0 changes                              | 23 (11.5%)  | 21 (20%)    | 31 (17.3%)  | 21 (16.9%)  | 26 (12.9%)       |          |    |       |
| 1 cancelation or delay                 | 70 (35%)    | 28 (26.7%)  | 48 (26.8%)  | 34 (27.4%)  | 34 (16.8%)       |          |    |       |

|                                                            |               |             |                 |               |                         |                      |           |          |
|------------------------------------------------------------|---------------|-------------|-----------------|---------------|-------------------------|----------------------|-----------|----------|
| 2 cancelations or delay                                    | 42 (21%)      | 20 (19%)    | 34 (19%)        | 30 (24.2%)    | 45 (22.3%)              |                      |           |          |
| 3 cancelations or delay                                    | 30 (15%)      | 18 (17.1%)  | 32 (17.9%)      | 21 (16.9%)    | 32 (15.8%)              |                      |           |          |
| 4 cancelations or delay                                    | 14 (7%)       | 6 (5.7%)    | 13 (7.3%)       | 6 (4.8%)      | 19 (9.4%)               |                      |           |          |
| 5 cancelations or delay                                    | 4 (2%)        | 3 (2.9%)    | 5 (2.8%)        | 3 (2.4%)      | 13 (6.4%)               |                      |           |          |
| 5+ cancelations or delay                                   | 17 (8.5%)     | 9 (8.6%)    | 16 (8.9%)       | 9 (7.3%)      | 33 (16.3%)              |                      |           |          |
| <b>Perceived risk of contracting COVID-19 (1-10 scale)</b> |               |             |                 |               |                         |                      |           |          |
| 1                                                          | 29 (11.2%)    | 13 (8.9%)   | 21 (7.7%)       | 8 (4.7%)      | 20 (7.1%)               |                      |           |          |
| 2                                                          | 34 (13.2%)    | 10 (6.8%)   | 12 (4.4%)       | 6 (3.5%)      | 14 (4.9%)               |                      |           |          |
| 3                                                          | 25 (9.7%)     | 11 (7.5%)   | 21 (7.7%)       | 14 (8.1%)     | 17 (6%)                 |                      |           |          |
| 4                                                          | 13 (5%)       | 7 (4.8%)    | 12 (4.4%)       | 6 (3.5%)      | 12 (4.2%)               |                      |           |          |
| 5                                                          | 31 (12%)      | 19 (13%)    | 21 (7.7%)       | 16 (9.3%)     | 24 (8.5%)               |                      |           |          |
| 6                                                          | 10 (3.9%)     | 8 (5.5%)    | 19 (6.9%)       | 11 (6.4%)     | 13 (4.6%)               |                      |           |          |
| 7                                                          | 28 (10.9%)    | 16 (11%)    | 35 (12.8%)      | 19 (11%)      | 29 (10.2%)              |                      |           |          |
| 8                                                          | 30 (11.6%)    | 14 (9.6%)   | 35 (12.8%)      | 31 (18%)      | 40 (14.1%)              |                      |           |          |
| 9                                                          | 14 (5.4%)     | 12 (8.2%)   | 17 (6.2%)       | 5 (2.9%)      | 21 (7.4%)               |                      |           |          |
| 10                                                         | 42 (16.3%)    | 32 (21.9%)  | 75 (27.4%)      | 51 (29.7%)    | 83 (29.3%)              |                      |           |          |
| Not Applicable                                             | 2 (0.8%)      | 4 (2.7%)    | 6 (2.2%)        | 5 (2.9%)      | 10 (3.5%)               | 3.314                | 4         | .507     |
| <b>Access to crisis support or mental health services</b>  |               |             |                 |               |                         |                      |           |          |
| Yes                                                        | 95 (36.8%)    | 55 (37.7%)  | 109 (39.8%)     | 63 (36.6%)    | 92 (32.5%)              |                      |           |          |
| No                                                         | 163 (63.2%)   | 91 (62.35)  | 165 (60.2%)     | 109 (63.4%)   | 191 (67.5%)             | <b>Anxiety</b>       |           |          |
| <b>Variables</b>                                           | <b>Normal</b> | <b>Mild</b> | <b>Moderate</b> | <b>Severe</b> | <b>Extremely Severe</b> | <b>χ<sup>2</sup></b> | <b>df</b> | <b>p</b> |
| <b>Age</b>                                                 |               |             |                 |               |                         | 35.225               | 12        | <.001    |
| 18-29                                                      | 69 (15.4%)    | 36 (22.5%)  | 35 (25.7%)      | 36 (32.7%)    | 50 (25.1%)              |                      |           |          |
| 30-49                                                      | 229 (51%)     | 86 (53.8%)  | 66 (48.55)      | 52 (47.3%)    | 112 (56.3%)             |                      |           |          |
| 50-69                                                      | 138 (30.7%)   | 35 (21.9%)  | 32 (23.5%)      | 21 (19.1%)    | 36 (18.1%)              |                      |           |          |
| 70+                                                        | 13 (2.9%)     | 3 (1.9%)    | 3 (2.2%)        | 1 (0.9%)      | 1 (0.5%)                |                      |           |          |

|                                                           |             |             |             |             |             |        |    |       |
|-----------------------------------------------------------|-------------|-------------|-------------|-------------|-------------|--------|----|-------|
| <b>Time stranded abroad</b>                               |             |             |             |             |             | 49.486 | 20 | <.001 |
| No wait                                                   | 22 (4.5%)   | 12 (7%)     | 9 (6.3%)    | 3 (2.6%)    | 7 (3.3%)    |        |    |       |
| Up to 1 month                                             | 51 (10.5%)  | 8 (4.7%)    | 7 (4.9%)    | 3 (2.6%)    | 5 (2.3%)    |        |    |       |
| 1-2 months                                                | 43 (8.8%)   | 12 (7%)     | 6 (4.2%)    | 10 (8.6%)   | 9 (4.2%)    |        |    |       |
| 2-3 months                                                | 55 (11.3%)  | 20 (11.6%)  | 11 (7.7%)   | 15 (12.9%)  | 16 (7.4%)   |        |    |       |
| 4-5 months                                                | 38 (7.8%)   | 15 (8.7%)   | 17 (12.0%)  | 5 (4.3%)    | 19 (8.8%)   |        |    |       |
| 5+ months                                                 | 279 (57.2%) | 105 (61%)   | 92 (64.8%)  | 80 (69%)    | 7 (3.3%)    |        |    |       |
| <b>Financial stress</b>                                   |             |             |             |             |             | 53.944 | 4  | <.001 |
| Yes                                                       | 258 (53.2%) | 114 (66.3%) | 97 (68.8%)  | 85 (73.3%)  | 170 (79.8%) |        |    |       |
| No                                                        | 227 (46.8%) | 58 (33.7%)  | 44 (31.2%)  | 31 (26.7%)  | 43 (20.2%)  |        |    |       |
| <b>Homelessness</b>                                       |             |             |             |             |             | 18.517 | 4  | <.001 |
| Yes                                                       | 44 (9.2%)   | 15 (8.9%)   | 16 (11.4%)  | 16 (13.8%)  | 42 (20.1%)  |        |    |       |
| No                                                        | 434 (90.8%) | 154 (91.1%) | 124 (88.6%) | 100 (86.2%) | 167 (79.9%) |        |    |       |
| <b>Employment Change</b>                                  |             |             |             |             |             | 34.917 | 4  | <.001 |
| Yes                                                       | 156 (35.7%) | 66 (44.6%)  | 65 (50%)    | 57 (52.8%)  | 109 (59.6%) |        |    |       |
| No                                                        | 281 (64.3%) | 82 (55.4%)  | 65 (50%)    | 51 (47.2%)  | 74 (40.4%)  |        |    |       |
| <b>Flight changes or cancellations</b>                    |             |             |             |             |             | 29.009 | 24 | .220  |
| 0 changes                                                 | 50 (14.3%)  | 16 (13.7%)  | 19 (19.4%)  | 15 (17.2%)  | 22 (13.8%)  |        |    |       |
| 1 cancelation or delay                                    | 110 (31.5%) | 27 (23.1%)  | 21 (21.4%)  | 23 (26.4%)  | 33 (20.8%)  |        |    |       |
| 2 cancelations or delay                                   | 79 (22.6%)  | 23 (19.7%)  | 15 (15.3%)  | 13 (14.9%)  | 41 (25.8%)  |        |    |       |
| 3 cancelations or delay                                   | 48 (13.8%)  | 23 (19.7%)  | 22 (22.4%)  | 19 (21.8%)  | 21 (13.2%)  |        |    |       |
| 4 cancelations or delay                                   | 21 (6%)     | 9 (7.7%)    | 8 (8.2%)    | 7 (8%)      | 13 (8.2%)   |        |    |       |
| 5 cancelations or delay                                   | 9 (2.6%)    | 7 (6%)      | 2 (2%)      | 2 (2.3%)    | 8 (5%)      |        |    |       |
| 5+ cancelations or delay                                  | 32 (9.2%)   | 12 (10.3%)  | 11 (11.2%)  | 8 (9.2%)    | 21 (13.2%)  |        |    |       |
| <b>Perceived risk of contracted COVID-19 (1-10 scale)</b> |             |             |             |             |             | 81.128 | 40 | <.001 |
| 1                                                         | 47 (9.6%)   | 8 (4.7%)    | 12 (8.5%)   | 9 (7.8%)    | 15 (7%)     |        |    |       |
| 2                                                         | 49 (10%)    | 5 (2.9%)    | 7 (4.9%)    | 1 (0.9%)    | 14 (6.5%)   |        |    |       |

|                                                           |               |             |                 |               |                         |                            |           |                 |
|-----------------------------------------------------------|---------------|-------------|-----------------|---------------|-------------------------|----------------------------|-----------|-----------------|
| 3                                                         | 43 (8.8%)     | 11 (6.4%)   | 14 (9.9%)       | 6 (5.2%)      | 14 (6.5%)               |                            |           |                 |
| 4                                                         | 20 (4.1%)     | 14 (8.1%)   | 7 (4.9%)        | 2 (1.7%)      | 7 (3.3%)                |                            |           |                 |
| 5                                                         | 62 (12.7%)    | 13 (7.6%)   | 8 (5.6%)        | 9 (7.8%)      | 19 (8.8%)               |                            |           |                 |
| 6                                                         | 25 (5.1%)     | 13 (7.6%)   | 9 (6.3%)        | 5 (4.3%)      | 9 (4.2%)                |                            |           |                 |
| 7                                                         | 62 (12.7%)    | 15 (8.7%)   | 13 (9.2%)       | 17 (14.7%)    | 20 (9.3%)               |                            |           |                 |
| 8                                                         | 54 (11.1%)    | 32 (18.6%)  | 20 (14.1%)      | 15 (12.9%)    | 29 (13.5%)              |                            |           |                 |
| 9                                                         | 24 (4.9%)     | 17 (9.9%)   | 10 (7%)         | 7 (6%)        | 11 (5.1%)               |                            |           |                 |
| 10                                                        | 92 (18.9%)    | 39 (22.7%)  | 39 (27.5%)      | 41 (35.3%)    | 72 (33.5%)              |                            |           |                 |
| Not applicable                                            | 10 (2%)       | 5 (2.9%)    | 3 (2.1%)        | 4 (3.4%)      | 5 (2.3%)                |                            |           |                 |
| <b>Access to crisis support or mental health services</b> |               |             |                 |               |                         | 2.210                      | 4         | .697            |
| Yes                                                       | 188 (38.5%)   | 59 (34.3%)  | 49 (34.5%)      | 38 (32.8%)    | 80 (37.2%)              |                            |           |                 |
| No                                                        | 300 (61.5%)   | 113 (65.7%) | 93 (65.5%)      | 78 (67.2%)    | 135 (62.8%)             |                            |           |                 |
|                                                           | <b>Stress</b> |             |                 |               |                         |                            |           |                 |
| <b>Variables</b>                                          | <b>Normal</b> | <b>Mild</b> | <b>Moderate</b> | <b>Severe</b> | <b>Extremely Severe</b> | <b><math>\chi^2</math></b> | <b>df</b> | <b><i>p</i></b> |
| <b>Age</b>                                                |               |             |                 |               |                         | 51.326                     | 12        | <.001           |
| 18-29                                                     | 47 (15%)      | 23 (17.2%)  | 44 (21.3%)      | 69 (29.9%)    | 43 (25.4%)              |                            |           |                 |
| 30-49                                                     | 154 (49.2%)   | 76 (56.7%)  | 106 (51.2%)     | 113 (48.9%)   | 96 (56.8%)              |                            |           |                 |
| 50-69                                                     | 96 (30.7%)    | 34 (25.4%)  | 56 (27.1%)      | 46 (19.9%)    | 30 (17.8%)              |                            |           |                 |
| 70+                                                       | 16 (5.1%)     | 1 (0.7%)    | 1 (0.5%)        | 3 (1.3%)      | 0                       |                            |           |                 |
| <b>Time stranded abroad</b>                               |               |             |                 |               |                         | 50.180                     | 20        | <.001           |
| No wait                                                   | 22 (6.7%)     | 3 (2.1%)    | 12 (5.4%)       | 12 (4.7%)     | 4 (2.2%)                |                            |           |                 |
| Up to 1 month                                             | 38 (11.5%)    | 9 (6.2%)    | 9 (4%)          | 13 (5.1%)     | 5 (2.8%)                |                            |           |                 |
| 1-2 months                                                | 27 (8.2%)     | 15 (10.3%)  | 16 (7.1%)       | 16 (6.3%)     | 6 (3.3%)                |                            |           |                 |
| 2-3 months                                                | 36 (10.9%)    | 15 (10.3%)  | 23 (10.3%)      | 30 (11.9%)    | 13 (7.2%)               |                            |           |                 |
| 4-5 months                                                | 28 (8.5%)     | 11 (7.6%)   | 17 (7.6%)       | 27 (10.7%)    | 11 (6.1%)               |                            |           |                 |
| 5+ months                                                 | 179(54.2%)    | 92 (63.4%)  | 147 (65.6%)     | 155 (61.3%)   | 142 (78.5%)             |                            |           |                 |
| <b>Financial stress</b>                                   |               |             |                 |               |                         | 40.368                     | 4         | <.001           |
| Yes                                                       | 176 (53.5%)   | 85 (58.6%)  | 146 (65.8%)     | 174 (69%)     | 143(79.9%)              |                            |           |                 |

|                                                           |             |             |             |             |             |        |    |       |
|-----------------------------------------------------------|-------------|-------------|-------------|-------------|-------------|--------|----|-------|
| No                                                        | 153 (46.5%) | 60(41.4%)   | 76 (34.2%)  | 78 (31%)    | 36 (20.1%)  |        |    |       |
| <b>Homelessness</b>                                       |             |             |             |             |             | 13.393 | 4  | .010  |
| Yes                                                       | 28 (8.5%)   | 15 (10.7%)  | 24 (10.9%)  | 32 (13%)    | 34 (19.3%)  |        |    |       |
| No                                                        | 300 (91.5%) | 125 (89.3%) | 197 (89.1%) | 215 (87%)   | 142 (80.7%) |        |    |       |
| <b>Employment Change</b>                                  |             |             |             |             |             | 31.232 | 4  | <.001 |
| Yes                                                       | 101 (33.8%) | 50 (40.7%)  | 96 (47.1%)  | 113 (51.4%) | 93 (58.1%)  |        |    |       |
| No                                                        | 198 (66.2%) | 73 (59.3%)  | 108 (52.9%) | 107 (48.6%) | 67 (41.9%)  |        |    |       |
| <b>Flight changes or cancellations</b>                    |             |             |             |             |             | 27.073 | 24 | .301  |
| 0 changes                                                 | 28 (11.5%)  | 15 (15%)    | 28 (18.8%)  | 31 (17%)    | 20 (14.8%)  |        |    |       |
| 1 cancelation or delay                                    | 79 (32.4%)  | 26 (26%)    | 43 (28.9%)  | 42 (23.1%)  | 24 (17.8%)  |        |    |       |
| 2 cancelations or delay                                   | 56 (23%)    | 21 (21%)    | 31 (20.8%)  | 36 (19.8%)  | 27 (20%)    |        |    |       |
| 3 cancelations or delay                                   | 36 (14.8%)  | 18 (18%)    | 24 (16.1%)  | 32 (17.6%)  | 23 (17%)    |        |    |       |
| 4 cancelations or delay                                   | 16 (6.6%)   | 6 (6%)      | 11 (7.4%)   | 14 (7.7%)   | 11 (8.1%)   |        |    |       |
| 5 cancelations or delay                                   | 9 (3.7%)    | 2 (2%)      | 2 (1.3%)    | 7 (3.8%)    | 8 (5.9%)    |        |    |       |
| 5+ cancelations or delay                                  | 20 (8.2%)   | 12 (12%)    | 10 (6.7%)   | 20 (11%)    | 22 (16.3%)  |        |    |       |
| <b>Perceived risk of contracted COVID-19 (1-10 scale)</b> |             |             |             |             |             | 66.487 | 40 | .005  |
| 1                                                         | 35 (10.6%)  | 11 (7.6%)   | 14 (6.3%)   | 16 (6.3%)   | 15 (8.3%)   |        |    |       |
| 2                                                         | 34 (10.3%)  | 10 (6.9%)   | 14 (6.3%)   | 11 (4.3%)   | 7 (3.9%)    |        |    |       |
| 3                                                         | 28 (8.5%)   | 14 (9.7%)   | 18 (8%)     | 20 (7.9%)   | 8 (4.4%)    |        |    |       |
| 4                                                         | 17 (5.2%)   | 7 (4.8%)    | 7 (3.1%)    | 13 (5.1%)   | 6 (3.3%)    |        |    |       |
| 5                                                         | 40 (12.1%)  | 15 (10.3%)  | 22 (9.8%)   | 19 (7.5%)   | 15 (8.35)   |        |    |       |
| 6                                                         | 21 (6.4%)   | 6 (4.1%)    | 12 (5.4%)   | 13 (5.1%)   | 9 (5%)      |        |    |       |
| 7                                                         | 34 (10.3%)  | 26 (17.9%)  | 24 (10.7%)  | 27 (10.7%)  | 16 (8.8%)   |        |    |       |
| 8                                                         | 41 (12.4%)  | 18 (12.4%)  | 35 (15.6%)  | 30 (11.9%)  | 26 (14.4%)  |        |    |       |
| 9                                                         | 14 (4.2%)   | 10 (6.9%)   | 20 (8.9%)   | 18 (7.1%)   | 7 (3.9%)    |        |    |       |
| 10                                                        | 62 (18.8%)  | 25 (17.2%)  | 53 (23.7%)  | 78 (30.8%)  | 65 (35.9%)  |        |    |       |
| Not applicable                                            | 4 (1.2%)    | 3 (2.1%)    | 5 (2.2%)    | 8 (3.2%)    | 7 (3.9%)    |        |    |       |



1  
2  
3  
4  
5  
6  
7  
8  
9  
10  
11  
12  
13  
14  
15  
16  
17  
18  
19  
20  
21  
22  
23  
24  
25  
26  
27  
28  
29  
30  
31  
32  
33  
34  
35  
36  
37  
38  
39  
40  
41  
42  
43  
44  
45  
46

|                                                                                                                                   |             |            |             |             |             |       |   |      |
|-----------------------------------------------------------------------------------------------------------------------------------|-------------|------------|-------------|-------------|-------------|-------|---|------|
| <b>Access to crisis support or mental health services</b>                                                                         |             |            |             |             |             | 3.371 | 4 | .498 |
| Yes                                                                                                                               | 113 (34.2%) | 60 (41.4%) | 82 (36.6%)  | 98 (38.7%)  | 61 (33.7%)  |       |   |      |
| No                                                                                                                                | 217 (65.8%) | 85 (58.6%) | 142 (63.4%) | 155 (61.3%) | 120 (66.3%) |       |   |      |
| <b><math>\chi^2</math>, chi squared; df, degrees of freedom; <i>p</i>, probability value (statistically significant &lt;.05).</b> |             |            |             |             |             |       |   |      |

For peer review only

STROBE Statement—Checklist of items that should be included in reports of *cross-sectional studies*

|                              | Item No | Recommendation                                                                                                                                                                                    | Page No  |
|------------------------------|---------|---------------------------------------------------------------------------------------------------------------------------------------------------------------------------------------------------|----------|
| <b>Title and abstract</b>    | 1       | (a) Indicate the study's design with a commonly used term in the title or the abstract                                                                                                            | 1        |
|                              |         | (b) Provide in the abstract an informative and balanced summary of what was done and what was found                                                                                               | 2        |
| <b>Introduction</b>          |         |                                                                                                                                                                                                   |          |
| Background/rationale         | 2       | Explain the scientific background and rationale for the investigation being reported                                                                                                              | 4        |
| Objectives                   | 3       | State specific objectives, including any prespecified hypotheses                                                                                                                                  | 4        |
| <b>Methods</b>               |         |                                                                                                                                                                                                   |          |
| Study design                 | 4       | Present key elements of study design early in the paper                                                                                                                                           | 5        |
| Setting                      | 5       | Describe the setting, locations, and relevant dates, including periods of recruitment, exposure, follow-up, and data collection                                                                   | 5        |
| Participants                 | 6       | (a) Give the eligibility criteria, and the sources and methods of selection of participants                                                                                                       | 5        |
| Variables                    | 7       | Clearly define all outcomes, exposures, predictors, potential confounders, and effect modifiers. Give diagnostic criteria, if applicable                                                          | 5        |
| Data sources/<br>measurement | 8*      | For each variable of interest, give sources of data and details of methods of assessment (measurement). Describe comparability of assessment methods if there is more than one group              | 5        |
| Bias                         | 9       | Describe any efforts to address potential sources of bias                                                                                                                                         | 5        |
| Study size                   | 10      | Explain how the study size was arrived at                                                                                                                                                         |          |
| Quantitative variables       | 11      | Explain how quantitative variables were handled in the analyses. If applicable, describe which groupings were chosen and why                                                                      | 5        |
| Statistical methods          | 12      | (a) Describe all statistical methods, including those used to control for confounding                                                                                                             | 6        |
|                              |         | (b) Describe any methods used to examine subgroups and interactions                                                                                                                               | 6        |
|                              |         | (c) Explain how missing data were addressed                                                                                                                                                       | 6        |
|                              |         | (d) If applicable, describe analytical methods taking account of sampling strategy                                                                                                                | 6        |
|                              |         | (e) Describe any sensitivity analyses                                                                                                                                                             | 6        |
| <b>Results</b>               |         |                                                                                                                                                                                                   |          |
| Participants                 | 13*     | (a) Report numbers of individuals at each stage of study—eg numbers potentially eligible, examined for eligibility, confirmed eligible, included in the study, completing follow-up, and analysed | 7        |
|                              |         | (b) Give reasons for non-participation at each stage                                                                                                                                              | 7        |
|                              |         | (c) Consider use of a flow diagram                                                                                                                                                                | Figure 1 |
| Descriptive data             | 14*     | (a) Give characteristics of study participants (eg demographic, clinical, social) and information on exposures and potential confounders                                                          | 7        |
|                              |         | (b) Indicate number of participants with missing data for each variable of interest                                                                                                               | Tables   |
| Outcome data                 | 15*     | Report numbers of outcome events or summary measures                                                                                                                                              | 7/8      |

1  
2  
3  
4  
5  
6  
7  
8  
9  
10  
11  
12  
13  
14  
15  
16  
17  
18  
19  
20  
21  
22  
23  
24  
25  
26  
27  
28  
29  
30  
31  
32  
33  
34  
35  
36  
37  
38  
39  
40  
41  
42  
43  
44  
45  
46  
47  
48  
49  
50  
51  
52  
53  
54  
55  
56  
57  
58  
59  
60

|                          |    |                                                                                                                                                                                                              |       |
|--------------------------|----|--------------------------------------------------------------------------------------------------------------------------------------------------------------------------------------------------------------|-------|
| Main results             | 16 | (a) Give unadjusted estimates and, if applicable, confounder-adjusted estimates and their precision (eg, 95% confidence interval). Make clear which confounders were adjusted for and why they were included | 7/8   |
|                          |    | (b) Report category boundaries when continuous variables were categorized                                                                                                                                    |       |
|                          |    | (c) If relevant, consider translating estimates of relative risk into absolute risk for a meaningful time period                                                                                             |       |
| Other analyses           | 17 | Report other analyses done—eg analyses of subgroups and interactions, and sensitivity analyses                                                                                                               | 7/8   |
| <b>Discussion</b>        |    |                                                                                                                                                                                                              |       |
| Key results              | 18 | Summarise key results with reference to study objectives                                                                                                                                                     | 9     |
| Limitations              | 19 | Discuss limitations of the study, taking into account sources of potential bias or imprecision. Discuss both direction and magnitude of any potential bias                                                   | 12    |
| Interpretation           | 20 | Give a cautious overall interpretation of results considering objectives, limitations, multiplicity of analyses, results from similar studies, and other relevant evidence                                   | 12    |
| Generalisability         | 21 | Discuss the generalisability (external validity) of the study results                                                                                                                                        | 10-12 |
| <b>Other information</b> |    |                                                                                                                                                                                                              |       |
| Funding                  | 22 | Give the source of funding and the role of the funders for the present study and, if applicable, for the original study on which the present article is based                                                | NA    |

\*Give information separately for exposed and unexposed groups.

**Note:** An Explanation and Elaboration article discusses each checklist item and gives methodological background and published examples of transparent reporting. The STROBE checklist is best used in conjunction with this article (freely available on the Web sites of PLoS Medicine at <http://www.plosmedicine.org/>, Annals of Internal Medicine at <http://www.annals.org/>, and Epidemiology at <http://www.epidem.com/>). Information on the STROBE Initiative is available at [www.strobe-statement.org](http://www.strobe-statement.org).
