# Supplementary material for: Examining the psychological and financial impact of travel restrictions on citizens and permanent residents stranded abroad during the COVID-19 pandemic: international cross-sectional study
Source: PubMed Central journal article supplement — BMJ Open. 2022 May 19;12(5):e059922. doi: 10.1136/bmjopen-2021-059922 (PMC9121108; doi:10.1136/bmjopen-2021-059922), 2022-05-19
Supplement: bmjopen-2021-059922supp001.pdf [file bmjopen-2021-059922supp001.pdf]

**Supplementary file 1. Associations between participant factors and levels of depression, anxiety, and stress**

| Variables                              | Depression  |             |             |             |                  | $\chi^2$ | df | p     |
|----------------------------------------|-------------|-------------|-------------|-------------|------------------|----------|----|-------|
|                                        | Normal      | Mild        | Moderate    | Severe      | Extremely Severe |          |    |       |
| <b>Age</b>                             |             |             |             |             |                  | 33.482   | 12 | <.001 |
| 18-29                                  | 38 (15.4%)  | 19 (14.4%)  | 55 (21.7%)  | 41 (25.8%)  | 73 (27.8%)       |          |    |       |
| 30-49                                  | 121 (49.2%) | 79 (59.8%)  | 131 (51.6%) | 77 (48.4%)  | 137 (52.1%)      |          |    |       |
| 50-69                                  | 76 (30.9%)  | 33 (25%)    | 64 (25.2%)  | 38 (23.9%)  | 51 (19.4%)       |          |    |       |
| 70+                                    | 11 (4.5%)   | 1 (0.8%)    | 4 (1.6%)    | 3 (1.9%)    | 2 (0.8%)         |          |    |       |
| <b>Time stranded abroad</b>            |             |             |             |             |                  | 82.982   | 20 | <.001 |
| No wait                                | 20 (7.8%)   | 4 (2.7%)    | 12 (4.4%)   | 6 (3.5%)    | 11 (3.9%)        |          |    |       |
| Up to 1 month                          | 32 (12.4%)  | 16 (11%)    | 14 (5.1%)   | 5 (2.9%)    | 7 (2.5%)         |          |    |       |
| 1-2 months                             | 32 (12.4%)  | 10 (6.8%)   | 23 (8.4%)   | 7 (4.1%)    | 8 (2.8%)         |          |    |       |
| 2-3 months                             | 32 (12.4%)  | 18 (12.3%)  | 22 (8%)     | 22 (12.8%)  | 23 (8.1%)        |          |    |       |
| 4-5 months                             | 21 (8.1%)   | 15 (10.3%)  | 22 (8%)     | 15 (8.7%)   | 21 (7.4%)        |          |    |       |
| 5+ months                              | 121 (46.9%) | 83 (56.8%)  | 181 (66.1%) | 117 (68%)   | 213 (75.3%)      |          |    |       |
| <b>Financial stress</b>                |             |             |             |             |                  | 35.123   | 4  | <.001 |
| Yes                                    | 140 (54.3%) | 85 (58.6%)  | 172 (63%)   | 109 (64.1%) | 218 (77.6%)      |          |    |       |
| No                                     | 118 (45.7%) | 60 (41.4%)  | 101 (37%)   | 61 (35.9%)  | 63 (22.4%)       |          |    |       |
| <b>Homelessness</b>                    |             |             |             |             |                  | 30.149   | 4  | <.001 |
| Yes                                    | 17 (6.6%)   | 16 (11.3%)  | 26 (9.7%)   | 16 (9.5%)   | 58 (20.9%)       |          |    |       |
| No                                     | 239 (93.4%) | 125 (88.7%) | 243 (90.3%) | 152 (90.5%) | 220 (79.1%)      |          |    |       |
| <b>Employment Change</b>               |             |             |             |             |                  | 22.648   | 4  | <.001 |
| Yes                                    | 89 (38.2%)  | 45 (34.9%)  | 107 (43.5%) | 74 (49%)    | 138 (55.9%)      |          |    |       |
| No                                     | 144 (61.8%) | 84 (65.1%)  | 139 (56.5%) | 77 (51%)    | 109 (44.1%)      |          |    |       |
| <b>Flight changes or cancellations</b> |             |             |             |             |                  | 36.694   | 24 | .029  |
| 0 changes                              | 23 (11.5%)  | 21 (20%)    | 31 (17.3%)  | 21 (16.9%)  | 26 (12.9%)       |          |    |       |
| 1 cancelation or delay                 | 70 (35%)    | 28 (26.7%)  | 48 (26.8%)  | 34 (27.4%)  | 34 (16.8%)       |          |    |       |

|                                                            |               |             |                 |               |                         |                            |           |          |
|------------------------------------------------------------|---------------|-------------|-----------------|---------------|-------------------------|----------------------------|-----------|----------|
| 2 cancelations or delay                                    | 42 (21%)      | 20 (19%)    | 34 (19%)        | 30 (24.2%)    | 45 (22.3%)              |                            |           |          |
| 3 cancelations or delay                                    | 30 (15%)      | 18 (17.1%)  | 32 (17.9%)      | 21 (16.9%)    | 32 (15.8%)              |                            |           |          |
| 4 cancelations or delay                                    | 14 (7%)       | 6 (5.7%)    | 13 (7.3%)       | 6 (4.8%)      | 19 (9.4%)               |                            |           |          |
| 5 cancelations or delay                                    | 4 (2%)        | 3 (2.9%)    | 5 (2.8%)        | 3 (2.4%)      | 13 (6.4%)               |                            |           |          |
| 5+ cancelations or delay                                   | 17 (8.5%)     | 9 (8.6%)    | 16 (8.9%)       | 9 (7.3%)      | 33 (16.3%)              |                            |           |          |
| <b>Perceived risk of contracting COVID-19 (1-10 scale)</b> |               |             |                 |               |                         | 67.542                     | 40        | .004     |
| 1                                                          | 29 (11.2%)    | 13 (8.9%)   | 21 (7.7%)       | 8 (4.7%)      | 20 (7.1%)               |                            |           |          |
| 2                                                          | 34 (13.2%)    | 10 (6.8%)   | 12 (4.4%)       | 6 (3.5%)      | 14 (4.9%)               |                            |           |          |
| 3                                                          | 25 (9.7%)     | 11 (7.5%)   | 21 (7.7%)       | 14 (8.1%)     | 17 (6%)                 |                            |           |          |
| 4                                                          | 13 (5%)       | 7 (4.8%)    | 12 (4.4%)       | 6 (3.5%)      | 12 (4.2%)               |                            |           |          |
| 5                                                          | 31 (12%)      | 19 (13%)    | 21 (7.7%)       | 16 (9.3%)     | 24 (8.5%)               |                            |           |          |
| 6                                                          | 10 (3.9%)     | 8 (5.5%)    | 19 (6.9%)       | 11 (6.4%)     | 13 (4.6%)               |                            |           |          |
| 7                                                          | 28 (10.9%)    | 16 (11%)    | 35 (12.8%)      | 19 (11%)      | 29 (10.2%)              |                            |           |          |
| 8                                                          | 30 (11.6%)    | 14 (9.6%)   | 35 (12.8%)      | 31 (18%)      | 40 (14.1%)              |                            |           |          |
| 9                                                          | 14 (5.4%)     | 12 (8.2%)   | 17 (6.2%)       | 5 (2.9%)      | 21 (7.4%)               |                            |           |          |
| 10                                                         | 42 (16.3%)    | 32 (21.9%)  | 75 (27.4%)      | 51 (29.7%)    | 83 (29.3%)              |                            |           |          |
| Not Applicable                                             | 2 (0.8%)      | 4 (2.7%)    | 6 (2.2%)        | 5 (2.9%)      | 10 (3.5%)               |                            |           |          |
| <b>Access to crisis support or mental health services</b>  |               |             |                 |               |                         | 3.314                      | 4         | .507     |
| Yes                                                        | 95 (36.8%)    | 55 (37.7%)  | 109 (39.8%)     | 63 (36.6%)    | 92 (32.5%)              |                            |           |          |
| No                                                         | 163 (63.2%)   | 91 (62.35)  | 165 (60.2%)     | 109 (63.4%)   | 191 (67.5%)             |                            |           |          |
| <b>Anxiety</b>                                             |               |             |                 |               |                         |                            |           |          |
| <b>Variables</b>                                           | <b>Normal</b> | <b>Mild</b> | <b>Moderate</b> | <b>Severe</b> | <b>Extremely Severe</b> | <b><math>\chi^2</math></b> | <b>df</b> | <b>p</b> |
| <b>Age</b>                                                 |               |             |                 |               |                         | 35.225                     | 12        | <.001    |
| 18-29                                                      | 69 (15.4%)    | 36 (22.5%)  | 35 (25.7%)      | 36 (32.7%)    | 50 (25.1%)              |                            |           |          |
| 30-49                                                      | 229 (51%)     | 86 (53.8%)  | 66 (48.55)      | 52 (47.3%)    | 112 (56.3%)             |                            |           |          |
| 50-69                                                      | 138 (30.7%)   | 35 (21.9%)  | 32 (23.5%)      | 21 (19.1%)    | 36 (18.1%)              |                            |           |          |
| 70+                                                        | 13 (2.9%)     | 3 (1.9%)    | 3 (2.2%)        | 1 (0.9%)      | 1 (0.5%)                |                            |           |          |

|                                                           |             |             |             |             |             |        |    |       |
|-----------------------------------------------------------|-------------|-------------|-------------|-------------|-------------|--------|----|-------|
| <b>Time stranded abroad</b>                               |             |             |             |             |             | 49.486 | 20 | <.001 |
| No wait                                                   | 22 (4.5%)   | 12 (7%)     | 9 (6.3%)    | 3 (2.6%)    | 7 (3.3%)    |        |    |       |
| Up to 1 month                                             | 51 (10.5%)  | 8 (4.7%)    | 7 (4.9%)    | 3 (2.6%)    | 5 (2.3%)    |        |    |       |
| 1-2 months                                                | 43 (8.8%)   | 12 (7%)     | 6 (4.2%)    | 10 (8.6%)   | 9 (4.2%)    |        |    |       |
| 2-3 months                                                | 55 (11.3%)  | 20 (11.6%)  | 11 (7.7%)   | 15 (12.9%)  | 16 (7.4%)   |        |    |       |
| 4-5 months                                                | 38 (7.8%)   | 15 (8.7%)   | 17 (12.0%)  | 5 (4.3%)    | 19 (8.8%)   |        |    |       |
| 5+ months                                                 | 279 (57.2%) | 105 (61%)   | 92 (64.8%)  | 80 (69%)    | 7 (3.3%)    |        |    |       |
| <b>Financial stress</b>                                   |             |             |             |             |             | 53.944 | 4  | <.001 |
| Yes                                                       | 258 (53.2%) | 114 (66.3%) | 97 (68.8%)  | 85 (73.3%)  | 170 (79.8%) |        |    |       |
| No                                                        | 227 (46.8%) | 58 (33.7%)  | 44 (31.2%)  | 31 (26.7%)  | 43 (20.2%)  |        |    |       |
| <b>Homelessness</b>                                       |             |             |             |             |             | 18.517 | 4  | <.001 |
| Yes                                                       | 44 (9.2%)   | 15 (8.9%)   | 16 (11.4%)  | 16 (13.8%)  | 42 (20.1%)  |        |    |       |
| No                                                        | 434 (90.8%) | 154 (91.1%) | 124 (88.6%) | 100 (86.2%) | 167 (79.9%) |        |    |       |
| <b>Employment Change</b>                                  |             |             |             |             |             | 34.917 | 4  | <.001 |
| Yes                                                       | 156 (35.7%) | 66 (44.6%)  | 65 (50%)    | 57 (52.8%)  | 109 (59.6%) |        |    |       |
| No                                                        | 281 (64.3%) | 82 (55.4%)  | 65 (50%)    | 51 (47.2%)  | 74 (40.4%)  |        |    |       |
| <b>Flight changes or cancellations</b>                    |             |             |             |             |             | 29.009 | 24 | .220  |
| 0 changes                                                 | 50 (14.3%)  | 16 (13.7%)  | 19 (19.4%)  | 15 (17.2%)  | 22 (13.8%)  |        |    |       |
| 1 cancelation or delay                                    | 110 (31.5%) | 27 (23.1%)  | 21 (21.4%)  | 23 (26.4%)  | 33 (20.8%)  |        |    |       |
| 2 cancelations or delay                                   | 79 (22.6%)  | 23 (19.7%)  | 15 (15.3%)  | 13 (14.9%)  | 41 (25.8%)  |        |    |       |
| 3 cancelations or delay                                   | 48 (13.8%)  | 23 (19.7%)  | 22 (22.4%)  | 19 (21.8%)  | 21 (13.2%)  |        |    |       |
| 4 cancelations or delay                                   | 21 (6%)     | 9 (7.7%)    | 8 (8.2%)    | 7 (8%)      | 13 (8.2%)   |        |    |       |
| 5 cancelations or delay                                   | 9 (2.6%)    | 7 (6%)      | 2 (2%)      | 2 (2.3%)    | 8 (5%)      |        |    |       |
| 5+ cancelations or delay                                  | 32 (9.2%)   | 12 (10.3%)  | 11 (11.2%)  | 8 (9.2%)    | 21 (13.2%)  |        |    |       |
| <b>Perceived risk of contracted COVID-19 (1-10 scale)</b> |             |             |             |             |             | 81.128 | 40 | <.001 |
| 1                                                         | 47 (9.6%)   | 8 (4.7%)    | 12 (8.5%)   | 9 (7.8%)    | 15 (7%)     |        |    |       |
| 2                                                         | 49 (10%)    | 5 (2.9%)    | 7 (4.9%)    | 1 (0.9%)    | 14 (6.5%)   |        |    |       |

|                                                           |               |             |                 |               |                         |                            |           |          |
|-----------------------------------------------------------|---------------|-------------|-----------------|---------------|-------------------------|----------------------------|-----------|----------|
| 3                                                         | 43 (8.8%)     | 11 (6.4%)   | 14 (9.9%)       | 6 (5.2%)      | 14 (6.5%)               |                            |           |          |
| 4                                                         | 20 (4.1%)     | 14 (8.1%)   | 7 (4.9%)        | 2 (1.7%)      | 7 (3.3%)                |                            |           |          |
| 5                                                         | 62 (12.7%)    | 13 (7.6%)   | 8 (5.6%)        | 9 (7.8%)      | 19 (8.8%)               |                            |           |          |
| 6                                                         | 25 (5.1%)     | 13 (7.6%)   | 9 (6.3%)        | 5 (4.3%)      | 9 (4.2%)                |                            |           |          |
| 7                                                         | 62 (12.7%)    | 15 (8.7%)   | 13 (9.2%)       | 17 (14.7%)    | 20 (9.3%)               |                            |           |          |
| 8                                                         | 54 (11.1%)    | 32 (18.6%)  | 20 (14.1%)      | 15 (12.9%)    | 29 (13.5%)              |                            |           |          |
| 9                                                         | 24 (4.9%)     | 17 (9.9%)   | 10 (7%)         | 7 (6%)        | 11 (5.1%)               |                            |           |          |
| 10                                                        | 92 (18.9%)    | 39 (22.7%)  | 39 (27.5%)      | 41 (35.3%)    | 72 (33.5%)              |                            |           |          |
| Not applicable                                            | 10 (2%)       | 5 (2.9%)    | 3 (2.1%)        | 4 (3.4%)      | 5 (2.3%)                |                            |           |          |
| <b>Access to crisis support or mental health services</b> |               |             |                 |               |                         | 2.210                      | 4         | .697     |
| Yes                                                       | 188 (38.5%)   | 59 (34.3%)  | 49 (34.5%)      | 38 (32.8%)    | 80 (37.2%)              |                            |           |          |
| No                                                        | 300 (61.5%)   | 113 (65.7%) | 93 (65.5%)      | 78 (67.2%)    | 135 (62.8%)             |                            |           |          |
|                                                           | <b>Stress</b> |             |                 |               |                         |                            |           |          |
| <b>Variables</b>                                          | <b>Normal</b> | <b>Mild</b> | <b>Moderate</b> | <b>Severe</b> | <b>Extremely Severe</b> | <b><math>\chi^2</math></b> | <b>df</b> | <b>p</b> |
| <b>Age</b>                                                |               |             |                 |               |                         | 51.326                     | 12        | <.001    |
| 18-29                                                     | 47 (15%)      | 23 (17.2%)  | 44 (21.3%)      | 69 (29.9%)    | 43 (25.4%)              |                            |           |          |
| 30-49                                                     | 154 (49.2%)   | 76 (56.7%)  | 106 (51.2%)     | 113 (48.9%)   | 96 (56.8%)              |                            |           |          |
| 50-69                                                     | 96 (30.7%)    | 34 (25.4%)  | 56 (27.1%)      | 46 (19.9%)    | 30 (17.8%)              |                            |           |          |
| 70+                                                       | 16 (5.1%)     | 1 (0.7%)    | 1 (0.5%)        | 3 (1.3%)      | 0                       |                            |           |          |
| <b>Time stranded abroad</b>                               |               |             |                 |               |                         | 50.180                     | 20        | <.001    |
| No wait                                                   | 22 (6.7%)     | 3 (2.1%)    | 12 (5.4%)       | 12 (4.7%)     | 4 (2.2%)                |                            |           |          |
| Up to 1 month                                             | 38 (11.5%)    | 9 (6.2%)    | 9 (4%)          | 13 (5.1%)     | 5 (2.8%)                |                            |           |          |
| 1-2 months                                                | 27 (8.2%)     | 15 (10.3%)  | 16 (7.1%)       | 16 (6.3%)     | 6 (3.3%)                |                            |           |          |
| 2-3 months                                                | 36 (10.9%)    | 15 (10.3%)  | 23 (10.3%)      | 30 (11.9%)    | 13 (7.2%)               |                            |           |          |
| 4-5 months                                                | 28 (8.5%)     | 11 (7.6%)   | 17 (7.6%)       | 27 (10.7%)    | 11 (6.1%)               |                            |           |          |
| 5+ months                                                 | 179(54.2%)    | 92 (63.4%)  | 147 (65.6%)     | 155 (61.3%)   | 142 (78.5%)             |                            |           |          |
| <b>Financial stress</b>                                   |               |             |                 |               |                         | 40.368                     | 4         | <.001    |
| Yes                                                       | 176 (53.5%)   | 85 (58.6%)  | 146 (65.8%)     | 174 (69%)     | 143(79.9%)              |                            |           |          |

|                                                           |             |             |             |             |             |        |    |       |
|-----------------------------------------------------------|-------------|-------------|-------------|-------------|-------------|--------|----|-------|
| No                                                        | 153 (46.5%) | 60(41.4%)   | 76 (34.2%)  | 78 (31%)    | 36 (20.1%)  |        |    |       |
| <b>Homelessness</b>                                       |             |             |             |             |             | 13.393 | 4  | .010  |
| Yes                                                       | 28 (8.5%)   | 15 (10.7%)  | 24 (10.9%)  | 32 (13%)    | 34 (19.3%)  |        |    |       |
| No                                                        | 300 (91.5%) | 125 (89.3%) | 197 (89.1%) | 215 (87%)   | 142 (80.7%) |        |    |       |
| <b>Employment Change</b>                                  |             |             |             |             |             | 31.232 | 4  | <.001 |
| Yes                                                       | 101 (33.8%) | 50 (40.7%)  | 96 (47.1%)  | 113 (51.4%) | 93 (58.1%)  |        |    |       |
| No                                                        | 198 (66.2%) | 73 (59.3%)  | 108 (52.9%) | 107 (48.6%) | 67 (41.9%)  |        |    |       |
| <b>Flight changes or cancellations</b>                    |             |             |             |             |             | 27.073 | 24 | .301  |
| 0 changes                                                 | 28 (11.5%)  | 15 (15%)    | 28 (18.8%)  | 31 (17%)    | 20 (14.8%)  |        |    |       |
| 1 cancelation or delay                                    | 79 (32.4%)  | 26 (26%)    | 43 (28.9%)  | 42 (23.1%)  | 24 (17.8%)  |        |    |       |
| 2 cancelations or delay                                   | 56 (23%)    | 21 (21%)    | 31 (20.8%)  | 36 (19.8%)  | 27 (20%)    |        |    |       |
| 3 cancelations or delay                                   | 36 (14.8%)  | 18 (18%)    | 24 (16.1%)  | 32 (17.6%)  | 23 (17%)    |        |    |       |
| 4 cancelations or delay                                   | 16 (6.6%)   | 6 (6%)      | 11 (7.4%)   | 14 (7.7%)   | 11 (8.1%)   |        |    |       |
| 5 cancelations or delay                                   | 9 (3.7%)    | 2 (2%)      | 2 (1.3%)    | 7 (3.8%)    | 8 (5.9%)    |        |    |       |
| 5+ cancelations or delay                                  | 20 (8.2%)   | 12 (12%)    | 10 (6.7%)   | 20 (11%)    | 22 (16.3%)  |        |    |       |
| <b>Perceived risk of contracted COVID-19 (1-10 scale)</b> |             |             |             |             |             | 66.487 | 40 | .005  |
| 1                                                         | 35 (10.6%)  | 11 (7.6%)   | 14 (6.3%)   | 16 (6.3%)   | 15 (8.3%)   |        |    |       |
| 2                                                         | 34 (10.3%)  | 10 (6.9%)   | 14 (6.3%)   | 11 (4.3%)   | 7 (3.9%)    |        |    |       |
| 3                                                         | 28 (8.5%)   | 14 (9.7%)   | 18 (8%)     | 20 (7.9%)   | 8 (4.4%)    |        |    |       |
| 4                                                         | 17 (5.2%)   | 7 (4.8%)    | 7 (3.1%)    | 13 (5.1%)   | 6 (3.3%)    |        |    |       |
| 5                                                         | 40 (12.1%)  | 15 (10.3%)  | 22 (9.8%)   | 19 (7.5%)   | 15 (8.35)   |        |    |       |
| 6                                                         | 21 (6.4%)   | 6 (4.1%)    | 12 (5.4%)   | 13 (5.1%)   | 9 (5%)      |        |    |       |
| 7                                                         | 34 (10.3%)  | 26 (17.9%)  | 24 (10.7%)  | 27 (10.7%)  | 16 (8.8%)   |        |    |       |
| 8                                                         | 41 (12.4%)  | 18 (12.4%)  | 35 (15.6%)  | 30 (11.9%)  | 26 (14.4%)  |        |    |       |
| 9                                                         | 14 (4.2%)   | 10 (6.9%)   | 20 (8.9%)   | 18 (7.1%)   | 7 (3.9%)    |        |    |       |
| 10                                                        | 62 (18.8%)  | 25 (17.2%)  | 53 (23.7%)  | 78 (30.8%)  | 65 (35.9%)  |        |    |       |
| Not applicable                                            | 4 (1.2%)    | 3 (2.1%)    | 5 (2.2%)    | 8 (3.2%)    | 7 (3.9%)    |        |    |       |

|                                                                                                                                   |             |            |             |             |             |       |   |      |
|-----------------------------------------------------------------------------------------------------------------------------------|-------------|------------|-------------|-------------|-------------|-------|---|------|
| <b>Access to crisis support or mental health services</b>                                                                         |             |            |             |             |             | 3.371 | 4 | .498 |
| Yes                                                                                                                               | 113 (34.2%) | 60 (41.4%) | 82 (36.6%)  | 98 (38.7%)  | 61 (33.7%)  |       |   |      |
| No                                                                                                                                | 217 (65.8%) | 85 (58.6%) | 142 (63.4%) | 155 (61.3%) | 120 (66.3%) |       |   |      |
| <b><math>\chi^2</math>, chi squared; df, degrees of freedom; <i>p</i>, probability value (statistically significant &lt;.05).</b> |             |            |             |             |             |       |   |      |
